# Supplementary material for: Glycoproteomics of a Single Protein: Revealing Tens of Thousands of Myozyme Glycoforms by Hybrid HPLC-MS Approaches
Source: PubMed Central journal article supplement (PMC10470421; doi:10.1016/j.mcpro.2023.100622), 2023-07-20

## Supplementary information 2

# Glycoproteomics of a single protein: revealing tens of thousands of Myozyme<sup>®</sup> glycoforms by hybrid HPLC-MS approaches

Fiammetta Di Marco<sup>a,b</sup>, Constantin Blöchl<sup>a,c</sup>, Wolfgang Esser-Skala<sup>b,d</sup>, Veronika Schäpertöns<sup>a,d</sup>, Tao Zhang<sup>c</sup>, Manfred Wuhrer<sup>c</sup>, Koen Sandra<sup>e</sup>, Therese Wohlschlager<sup>a,b</sup>, Christian G. Huber<sup>a,b</sup>

a. Department of Biosciences and Medical Biology, Bioanalytical Research Labs, University of Salzburg, Hellbrunner Straße 34, 5020 Salzburg, Austria

b. Christian Doppler Laboratory for Innovative Tools for Biosimilar Characterization, University of Salzburg, Hellbrunner Straße 34, 5020 Salzburg, Austria

c. Center for Proteomics and Metabolomics, Leiden University Medical Center, Albinusdreef 2, 2333 ZA Leiden, The Netherlands

d. Department of Biosciences and Medical Biology, Computational Systems Biology Group, University of Salzburg, Hellbrunner Straße 34, 5020 Salzburg, Austria

e. Research Institute for Chromatography (RIC), President Kennedypark 26, 8500 Kortrijk, Belgium

\* Correspondence: [c.huber@sbg.ac.at](mailto:c.huber@sbg.ac.at), [c.blochl@lumc.nl](mailto:c.blochl@lumc.nl), [m.wuhrer@lumc.nl](mailto:m.wuhrer@lumc.nl), [t.zhang@lumc.nl](mailto:t.zhang@lumc.nl)

# Glycan 1

M2F (H2N2F1)

Monoisotopic mass: 896.35 Da  
Charge observed: 1-  
Theoretical ion:  $m/z$  895.34  
Observed ion:  $m/z$  895.45  
Mass deviation:  $m/z$  0.11  
Retention time: 58.6 min

UniCarb-DB: #2223

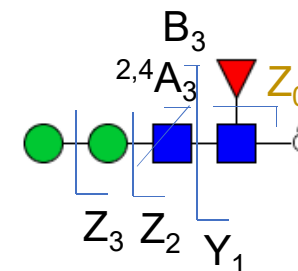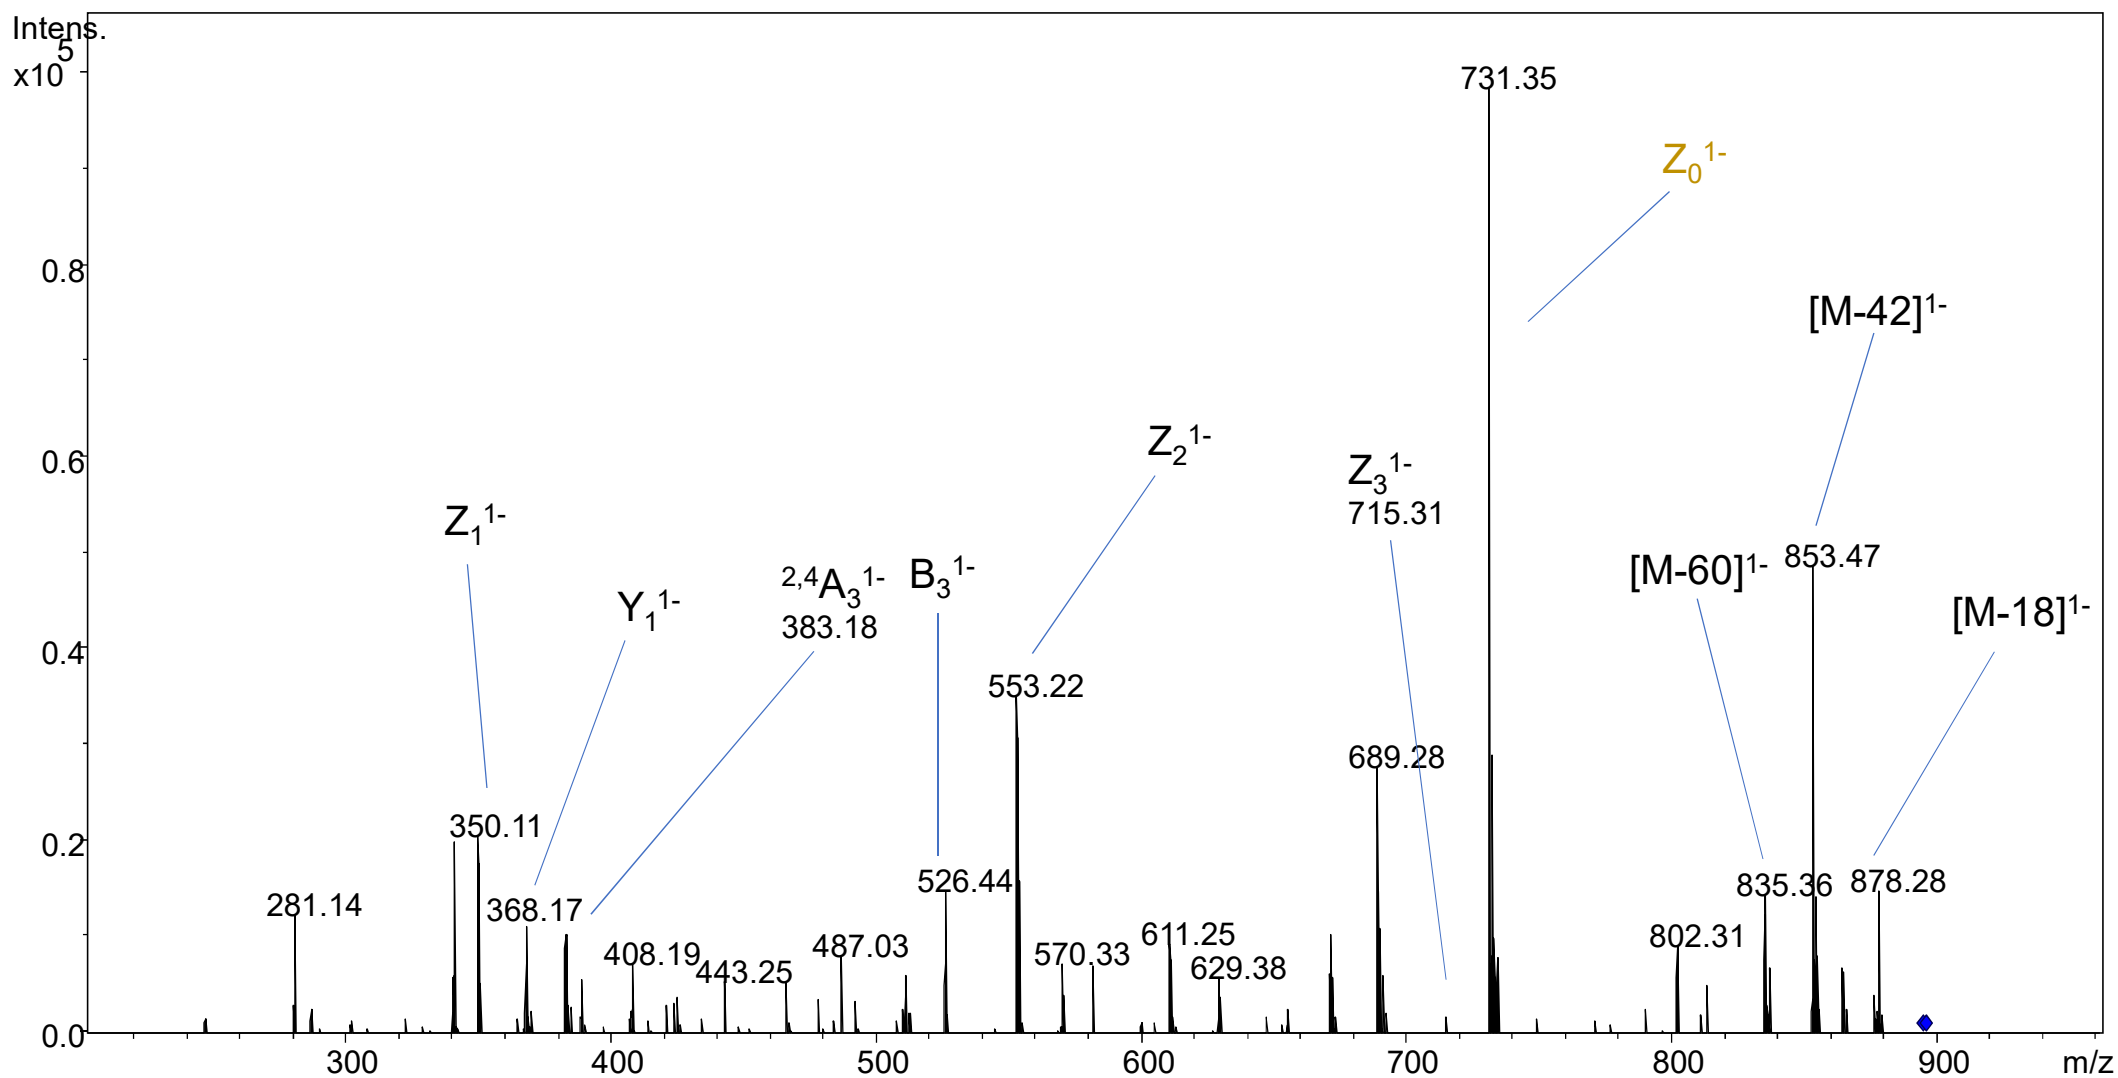



# Glycan 3

## M3F (H3N2F1)

Monoisotopic mass: 1058.40 Da  
Charge observed: 1-  
Theoretical ion:  $m/z$  1057.39  
Observed ion:  $m/z$  1057.53  
Mass deviation:  $m/z$  0.14  
Retention time: 66.4 min

UniCarb-DB: #441

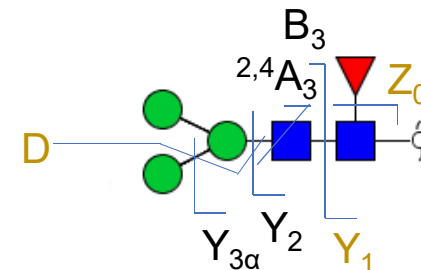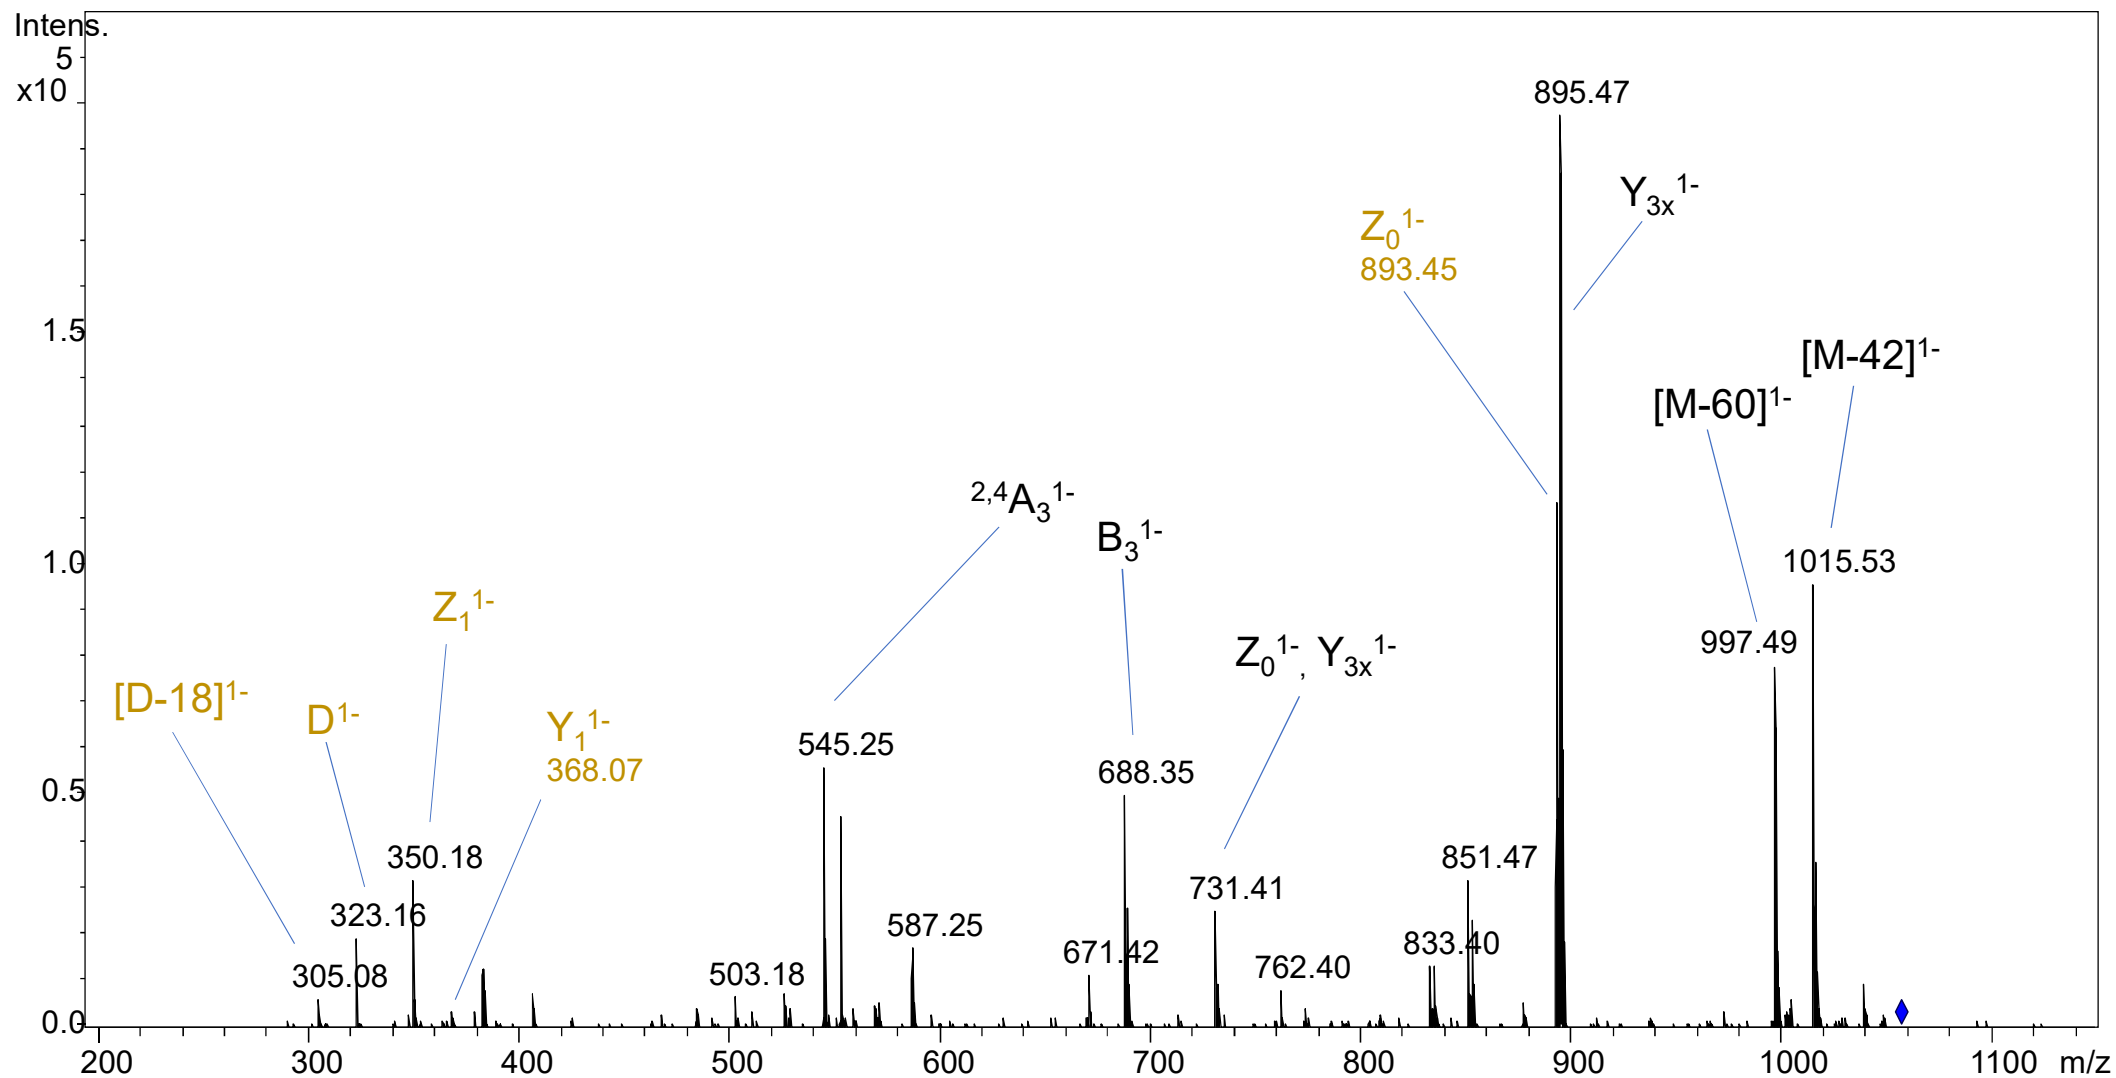

# Glycan 4

## M4 (H4N2)

Monoisotopic mass: 1074.40 Da  
Charge observed: 1-  
Theoretical ion:  $m/z$  1073.39  
Observed ion:  $m/z$  1073.53  
Mass deviation:  $m/z$  0.14  
Retention time: 52.2 min

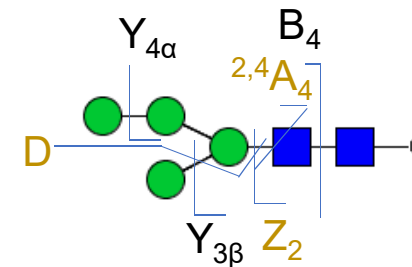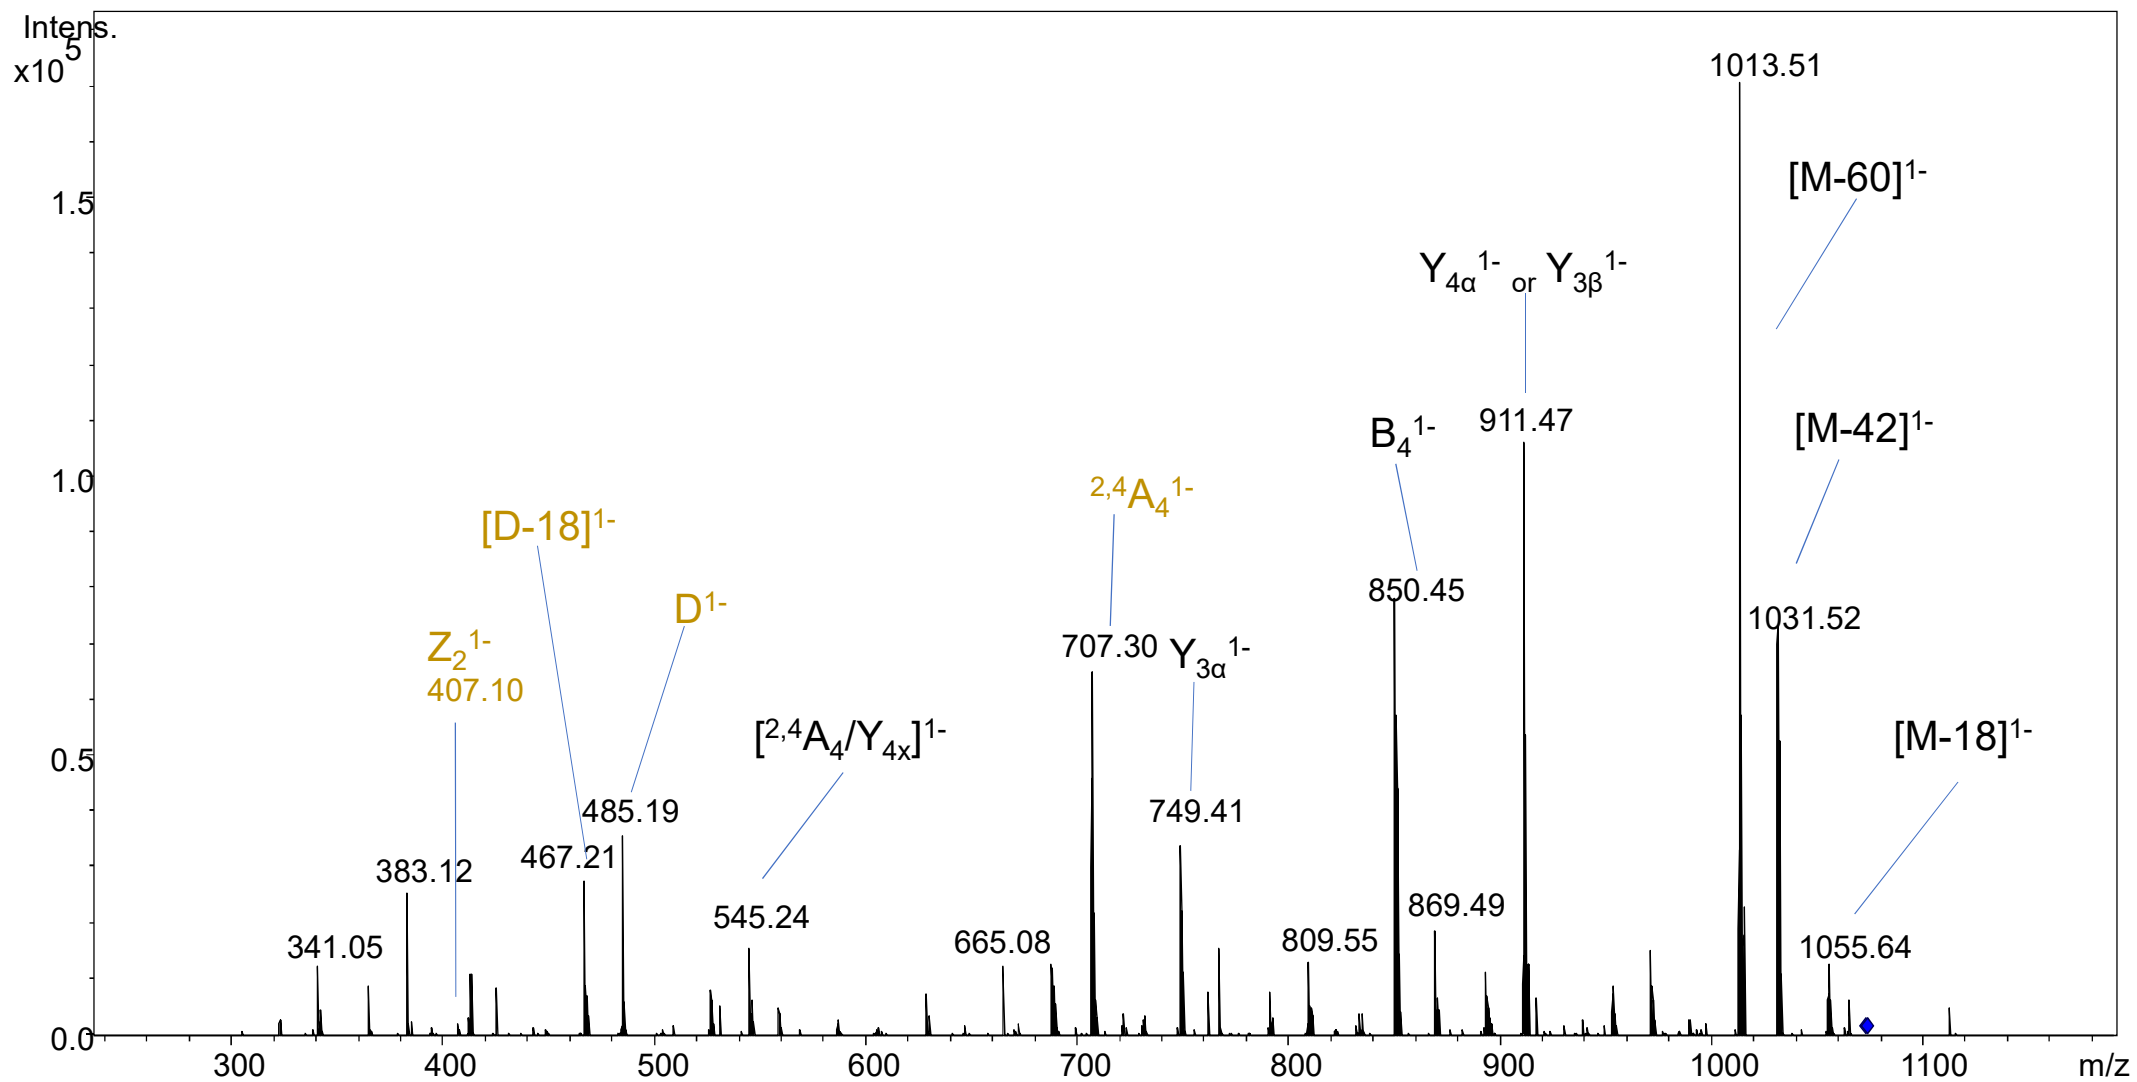

# Glycan 5a

M5 (H5N2)

Monoisotopic mass: 1236.45 Da  
Charge observed: 1-  
Theoretical ion:  $m/z$  1235.44  
Observed ion:  $m/z$  1235.57  
Mass deviation:  $m/z$  0.13  
Retention time: 42.6 min

UniCarb-DB: #2213

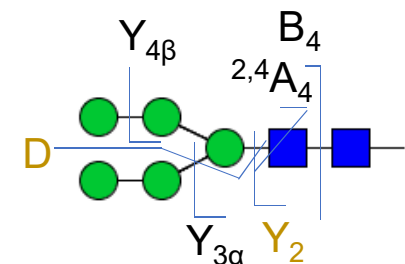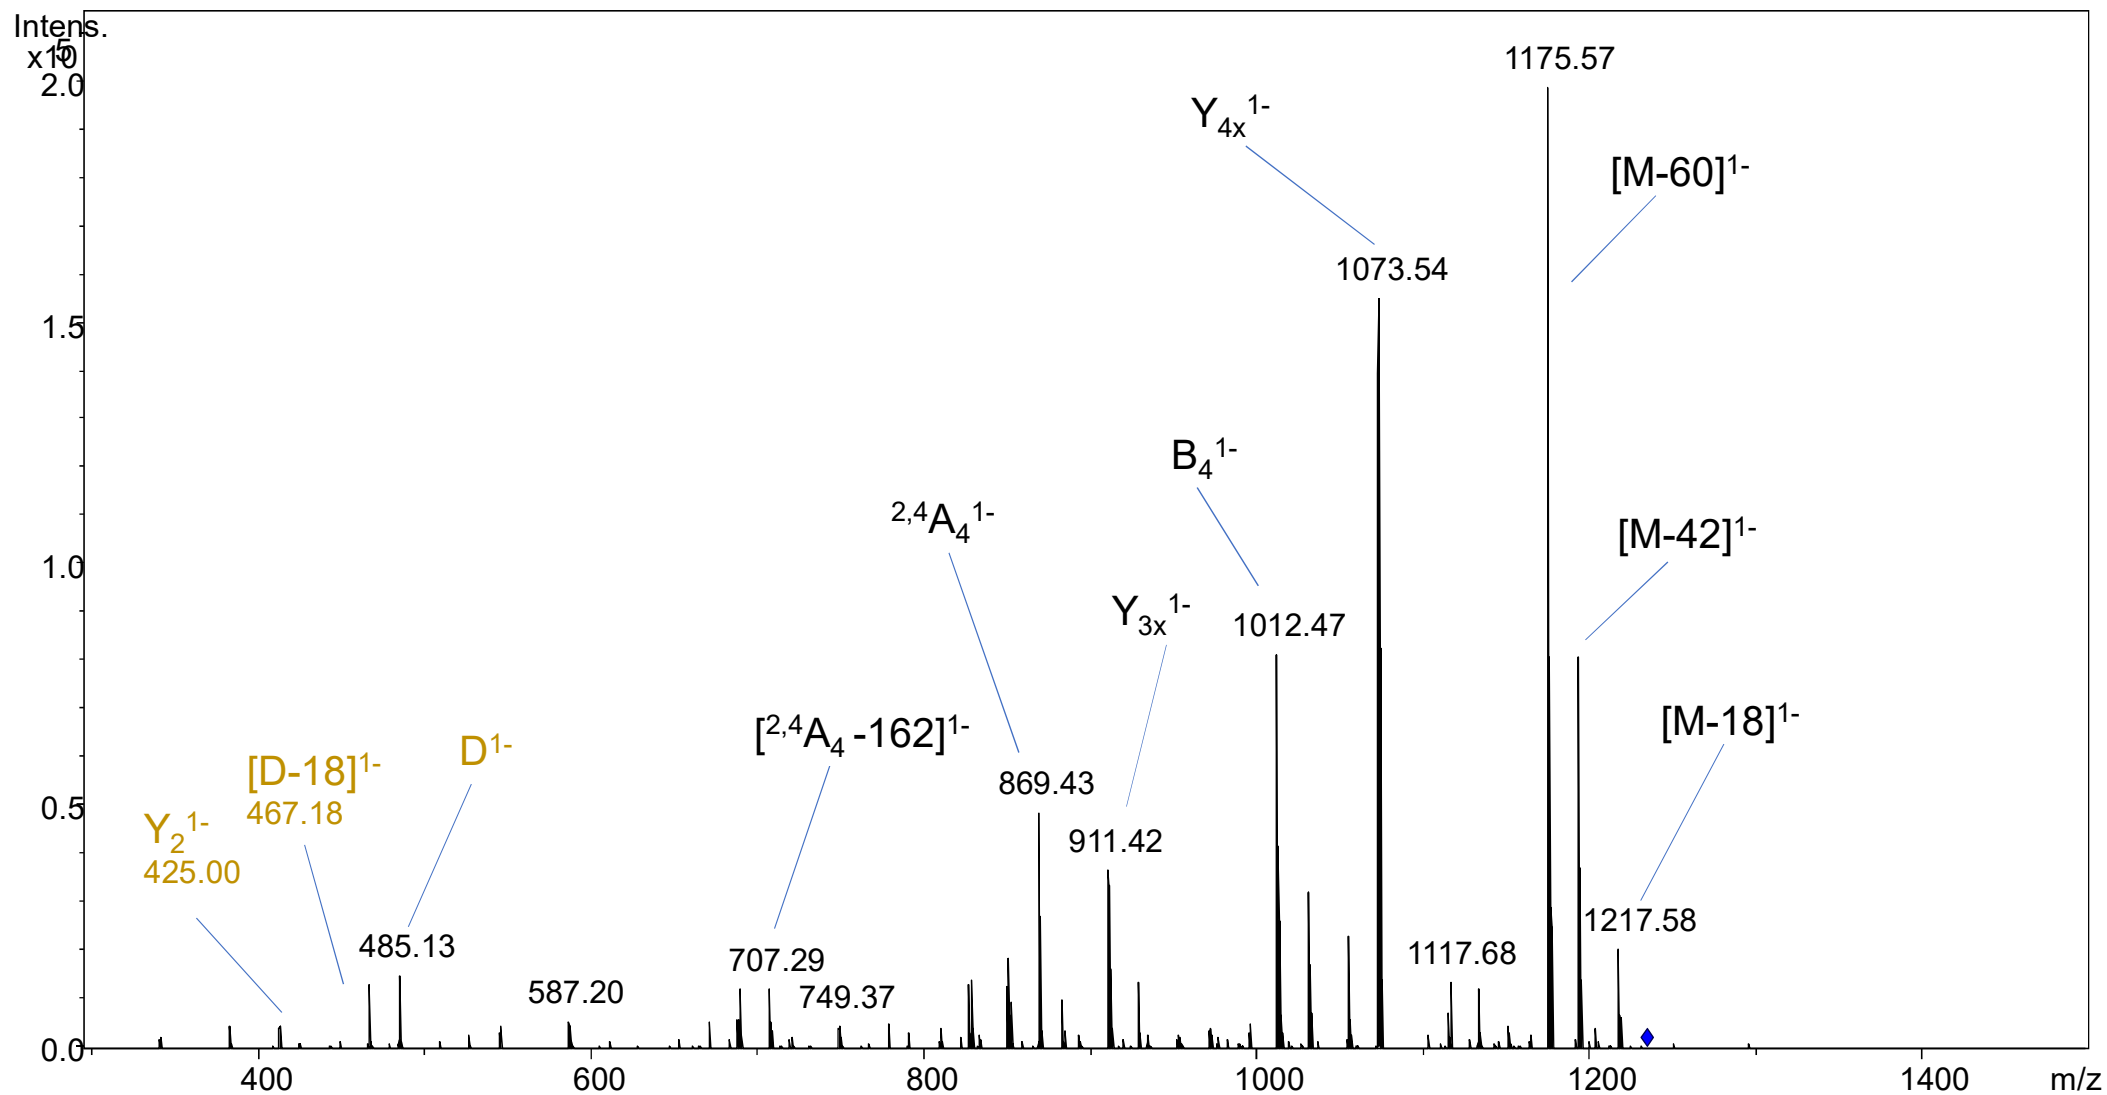

# Glycan 5b

M5 (H5N2)

Monoisotopic mass: 1236.45 Da  
Charge observed: 1-  
Theoretical ion:  $m/z$  1235.44  
Observed ion:  $m/z$  1235.60  
Mass deviation:  $m/z$  0.16  
Retention time: 57.6 min

UniCarb-DB: #395

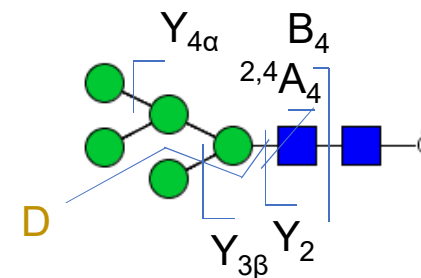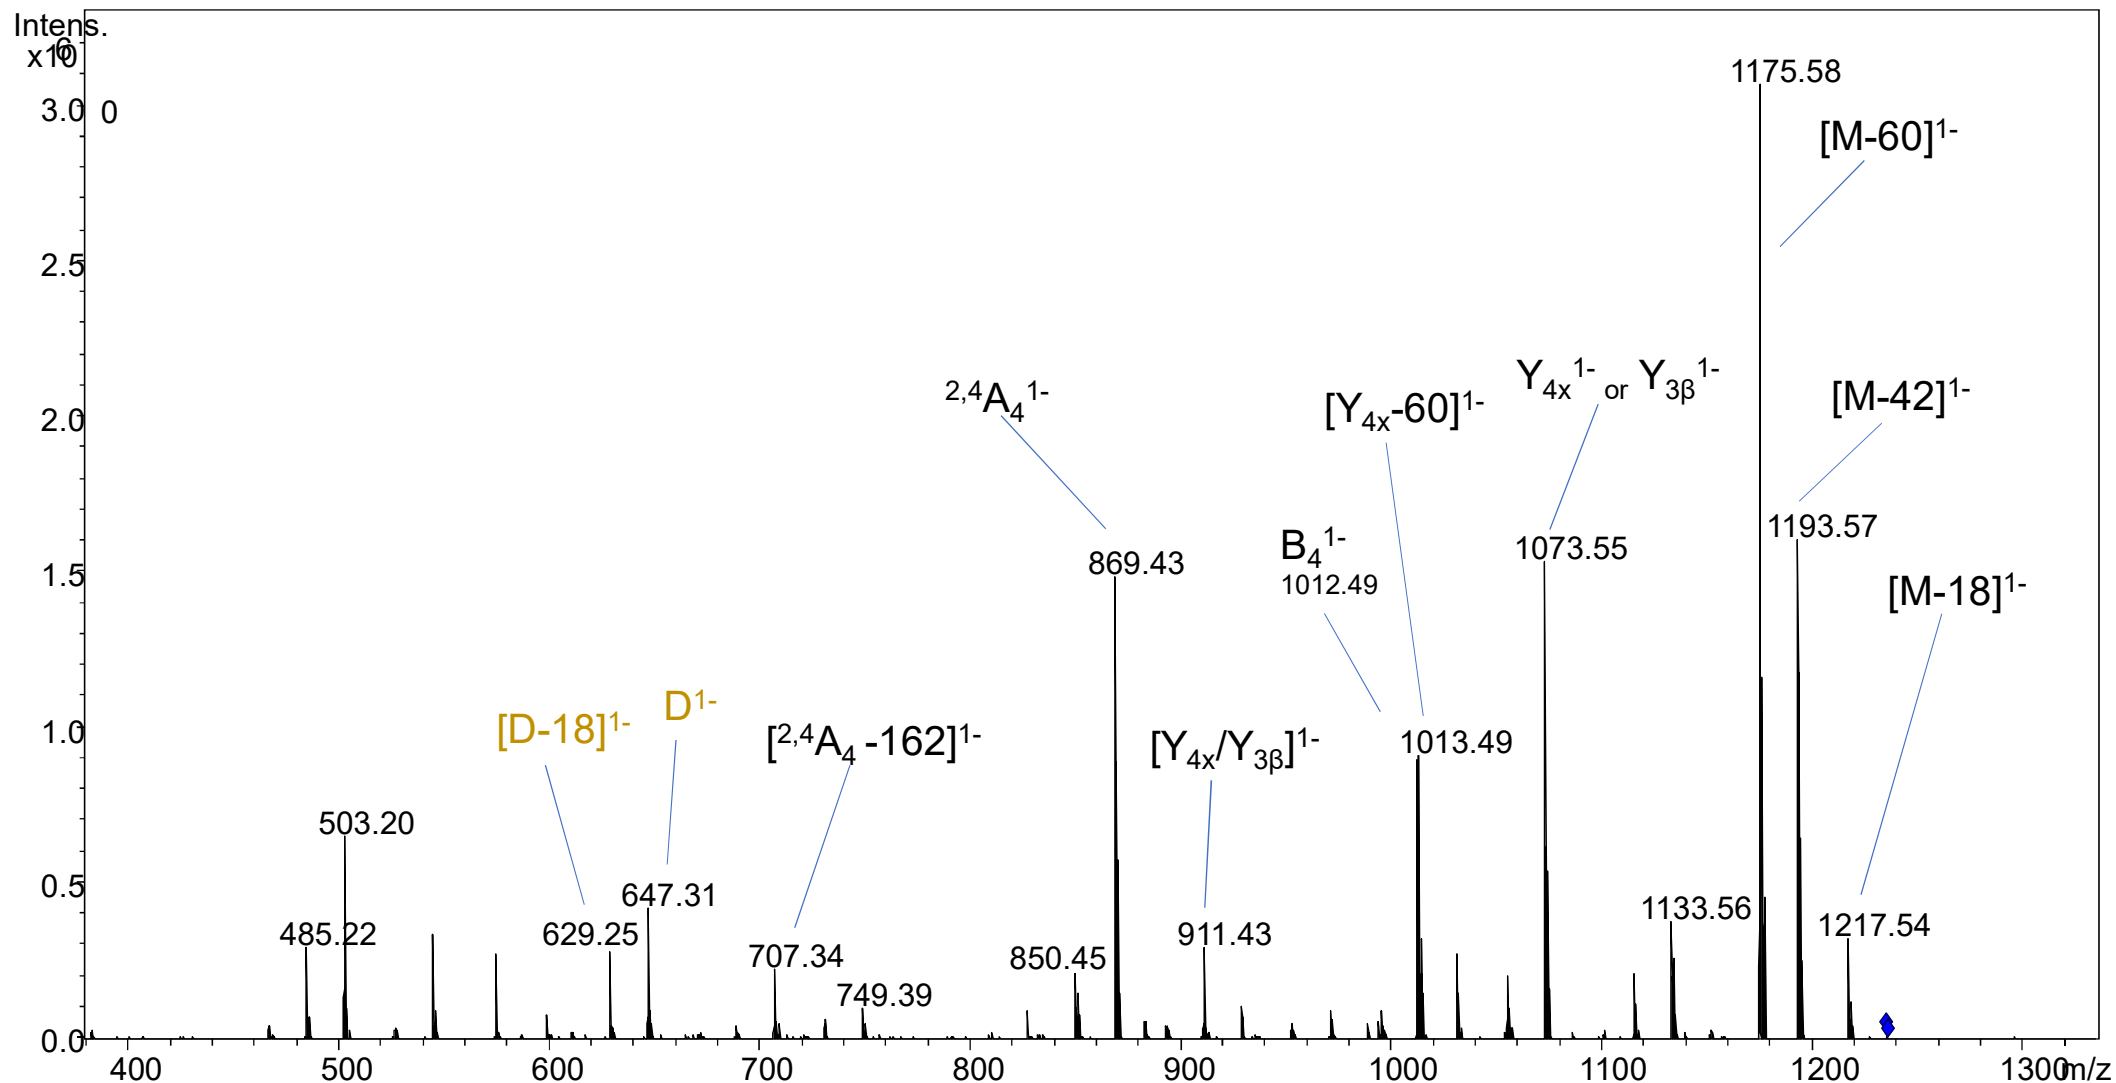

# Glycan 6

## M6 (H6N2)

Monoisotopic mass: 1398.51 Da  
Charge observed: 1-  
Theoretical ion:  $m/z$  1397.50  
Observed ion:  $m/z$  1397.67  
Mass deviation:  $m/z$  0.17  
Retention time: 48.4 min

UniCarb-DB: #613

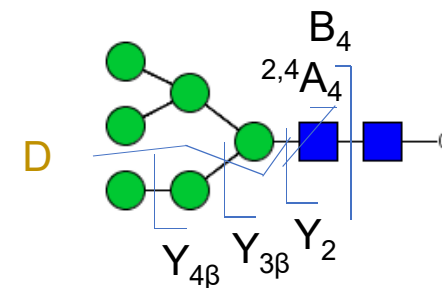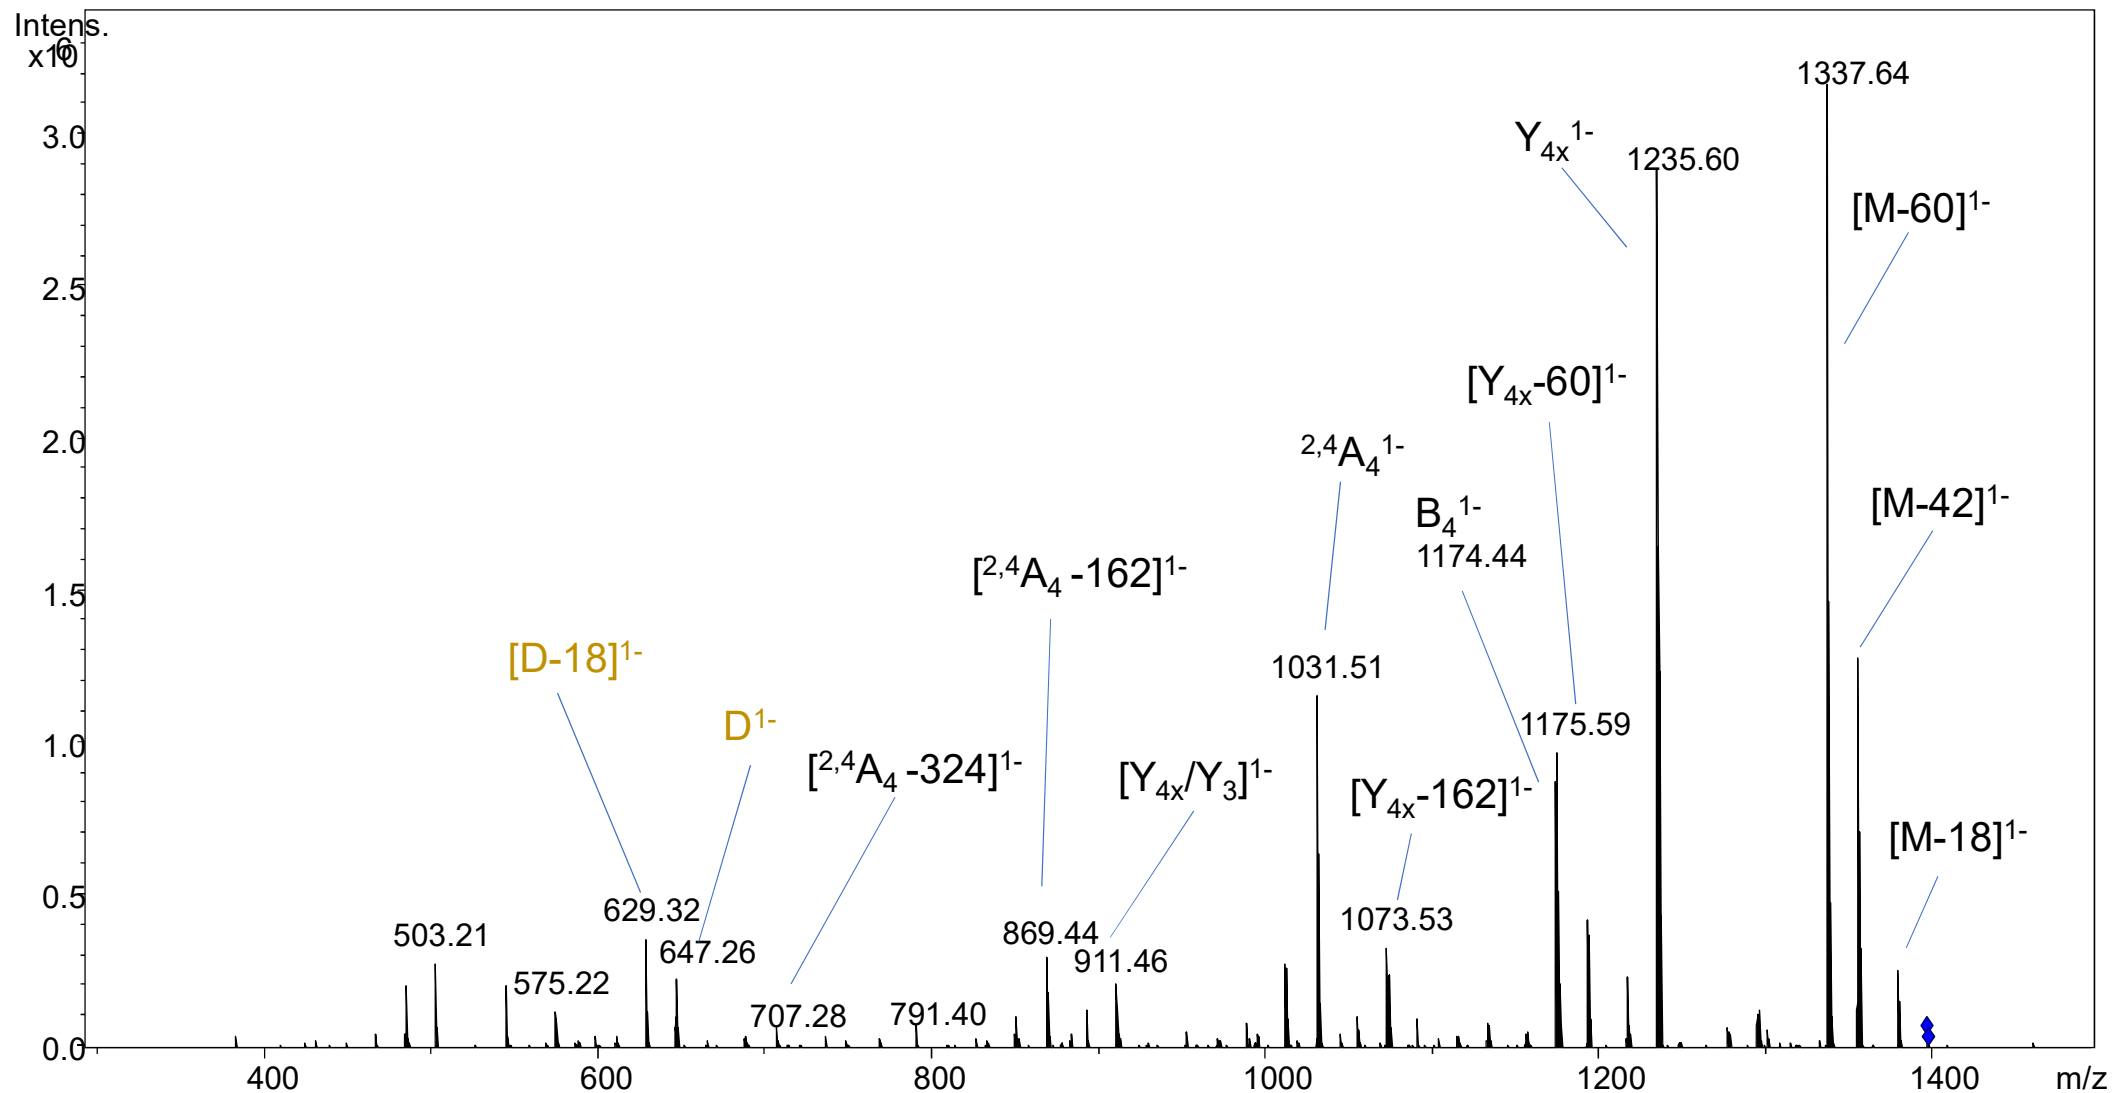



# Glycan 7a

M7 (H7N2)

Monoisotopic mass: 1560.55 Da  
Charge observed: 2-  
Theoretical ion:  $m/z$  779.27  
Observed ion:  $m/z$  779.42  
Mass deviation:  $m/z$  0.15  
Retention time: 46.6 min

UniCarb-DB: #403

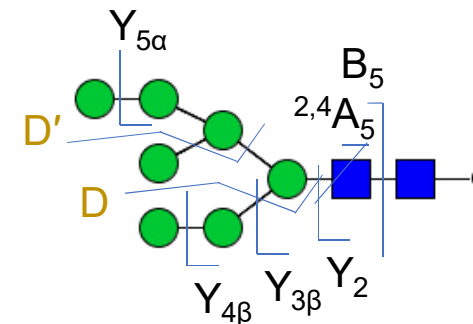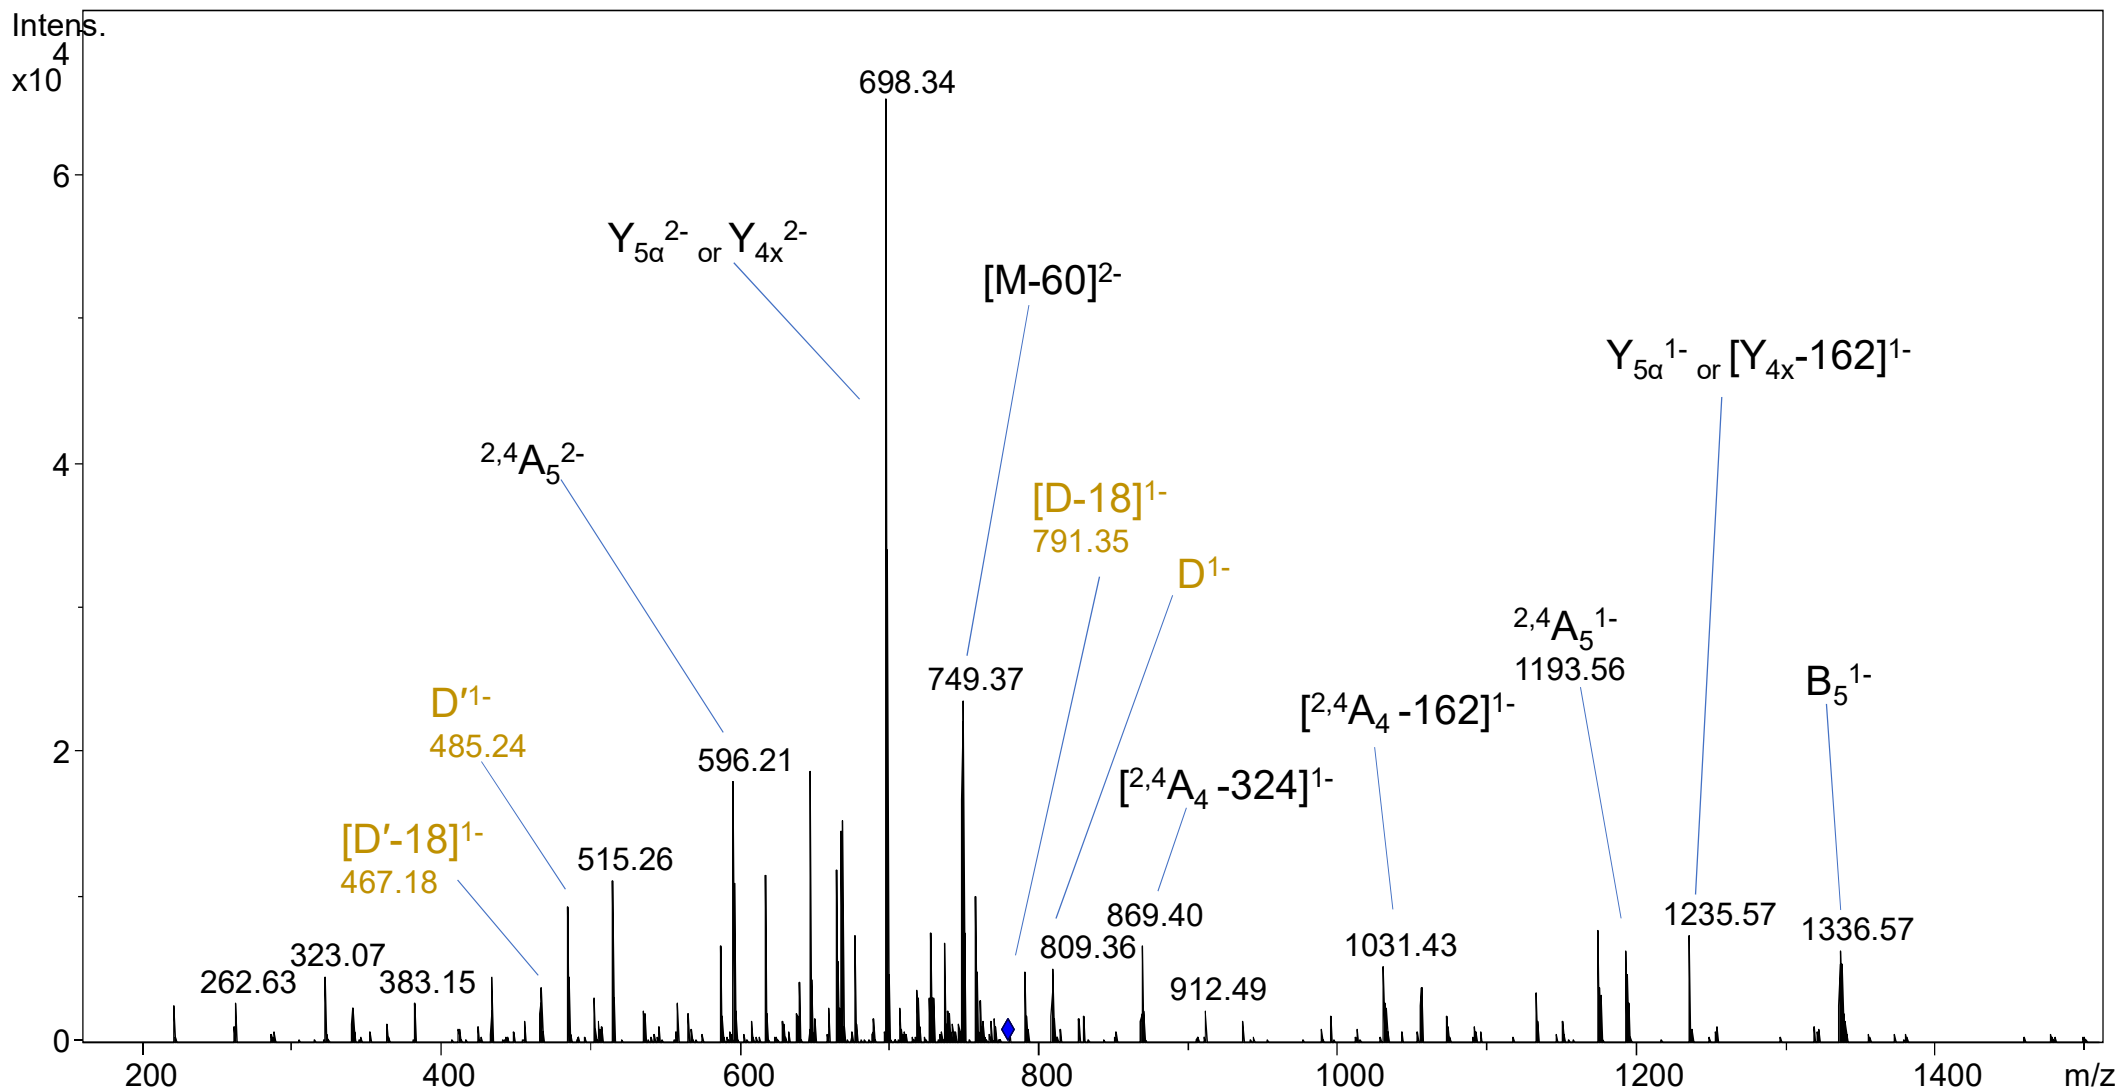



# Glycan 8

## M5P (H5N2P1)

Monoisotopic mass: 1316.42 Da  
Charge observed: 1-  
Theoretical ion:  $m/z$  1315.41  
Observed ion:  $m/z$  1315.58  
Mass deviation:  $m/z$  0.17  
Retention time: 33.4 min

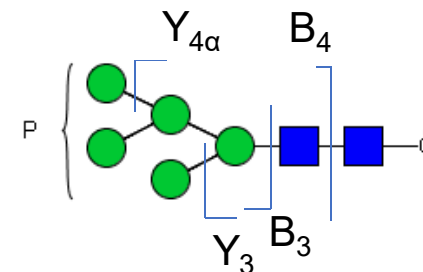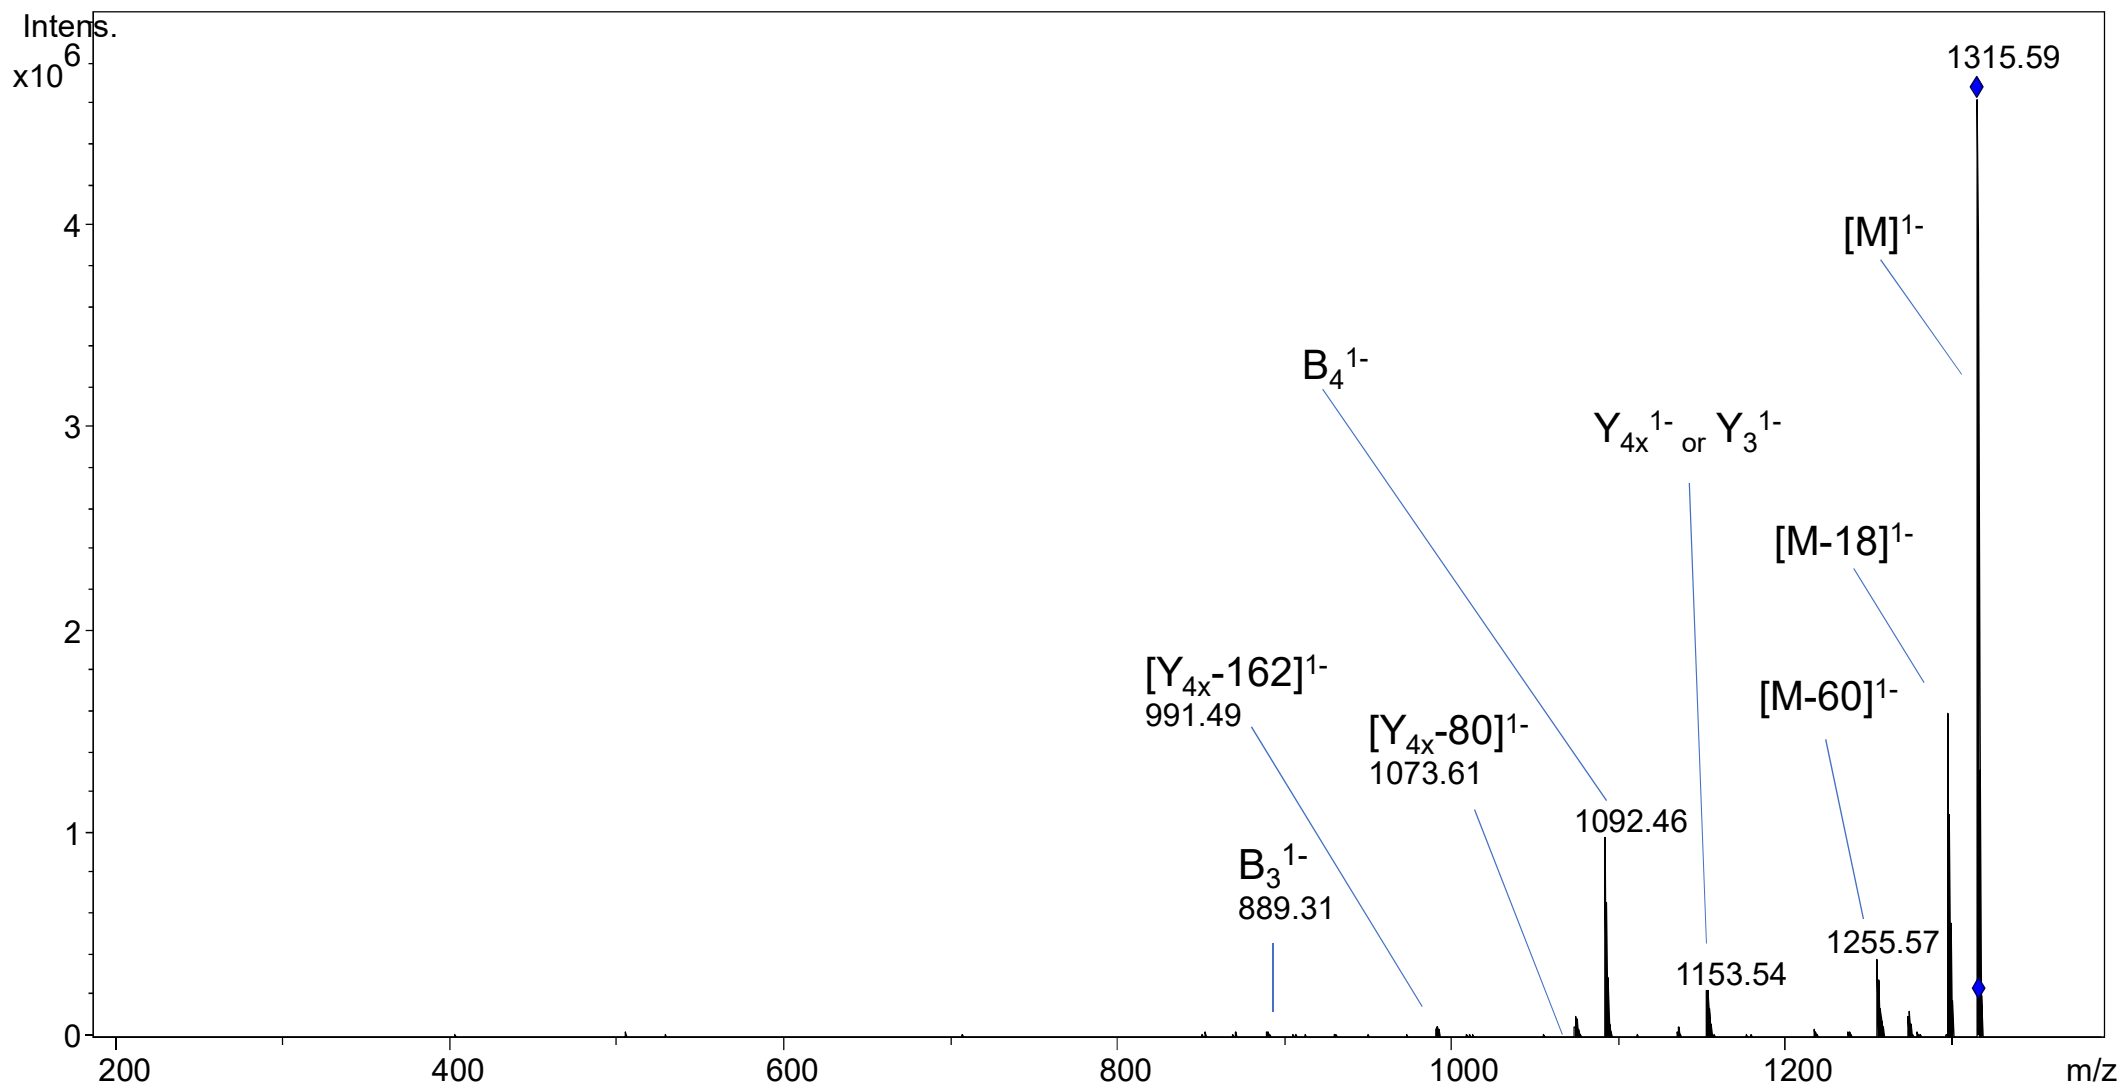





# Glycan 10

M6P2 (H6N2P2)

Monoisotopic mass: 1558.43 Da  
Charge observed: 2-  
Theoretical ion:  $m/z$  778.21  
Observed ion:  $m/z$  778.33  
Mass deviation:  $m/z$  0.12  
Retention time: 30.6 min

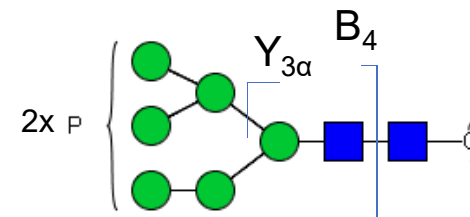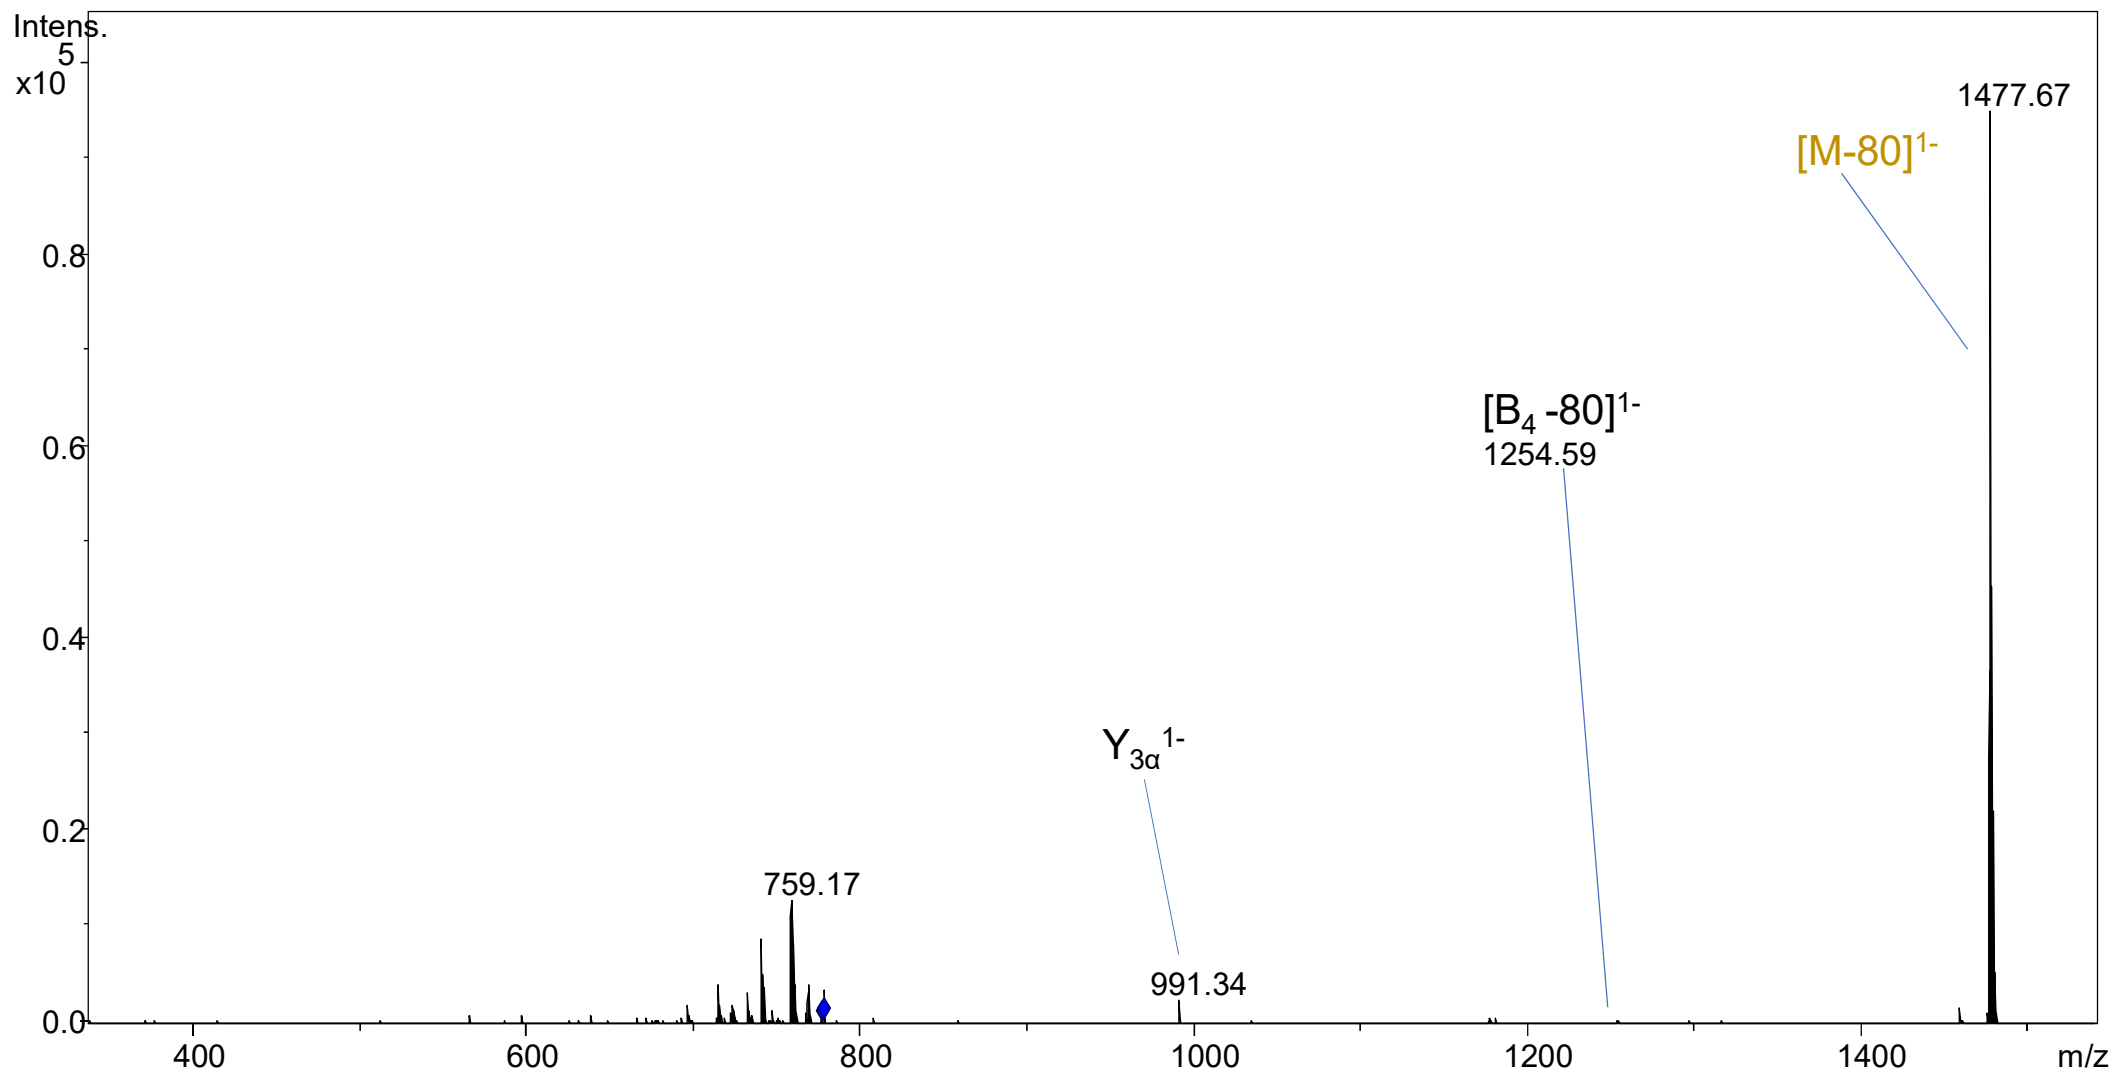







# Glycan 13

M7P2  
(H7N2P2)

Monoisotopic mass: 1720.49 Da  
Charge observed: 2-  
Theoretical ion:  $m/z$  859.24  
Observed ion:  $m/z$  859.38  
Mass deviation:  $m/z$  0.14  
Retention time: 31.7 min

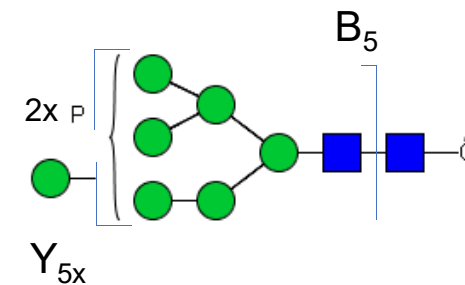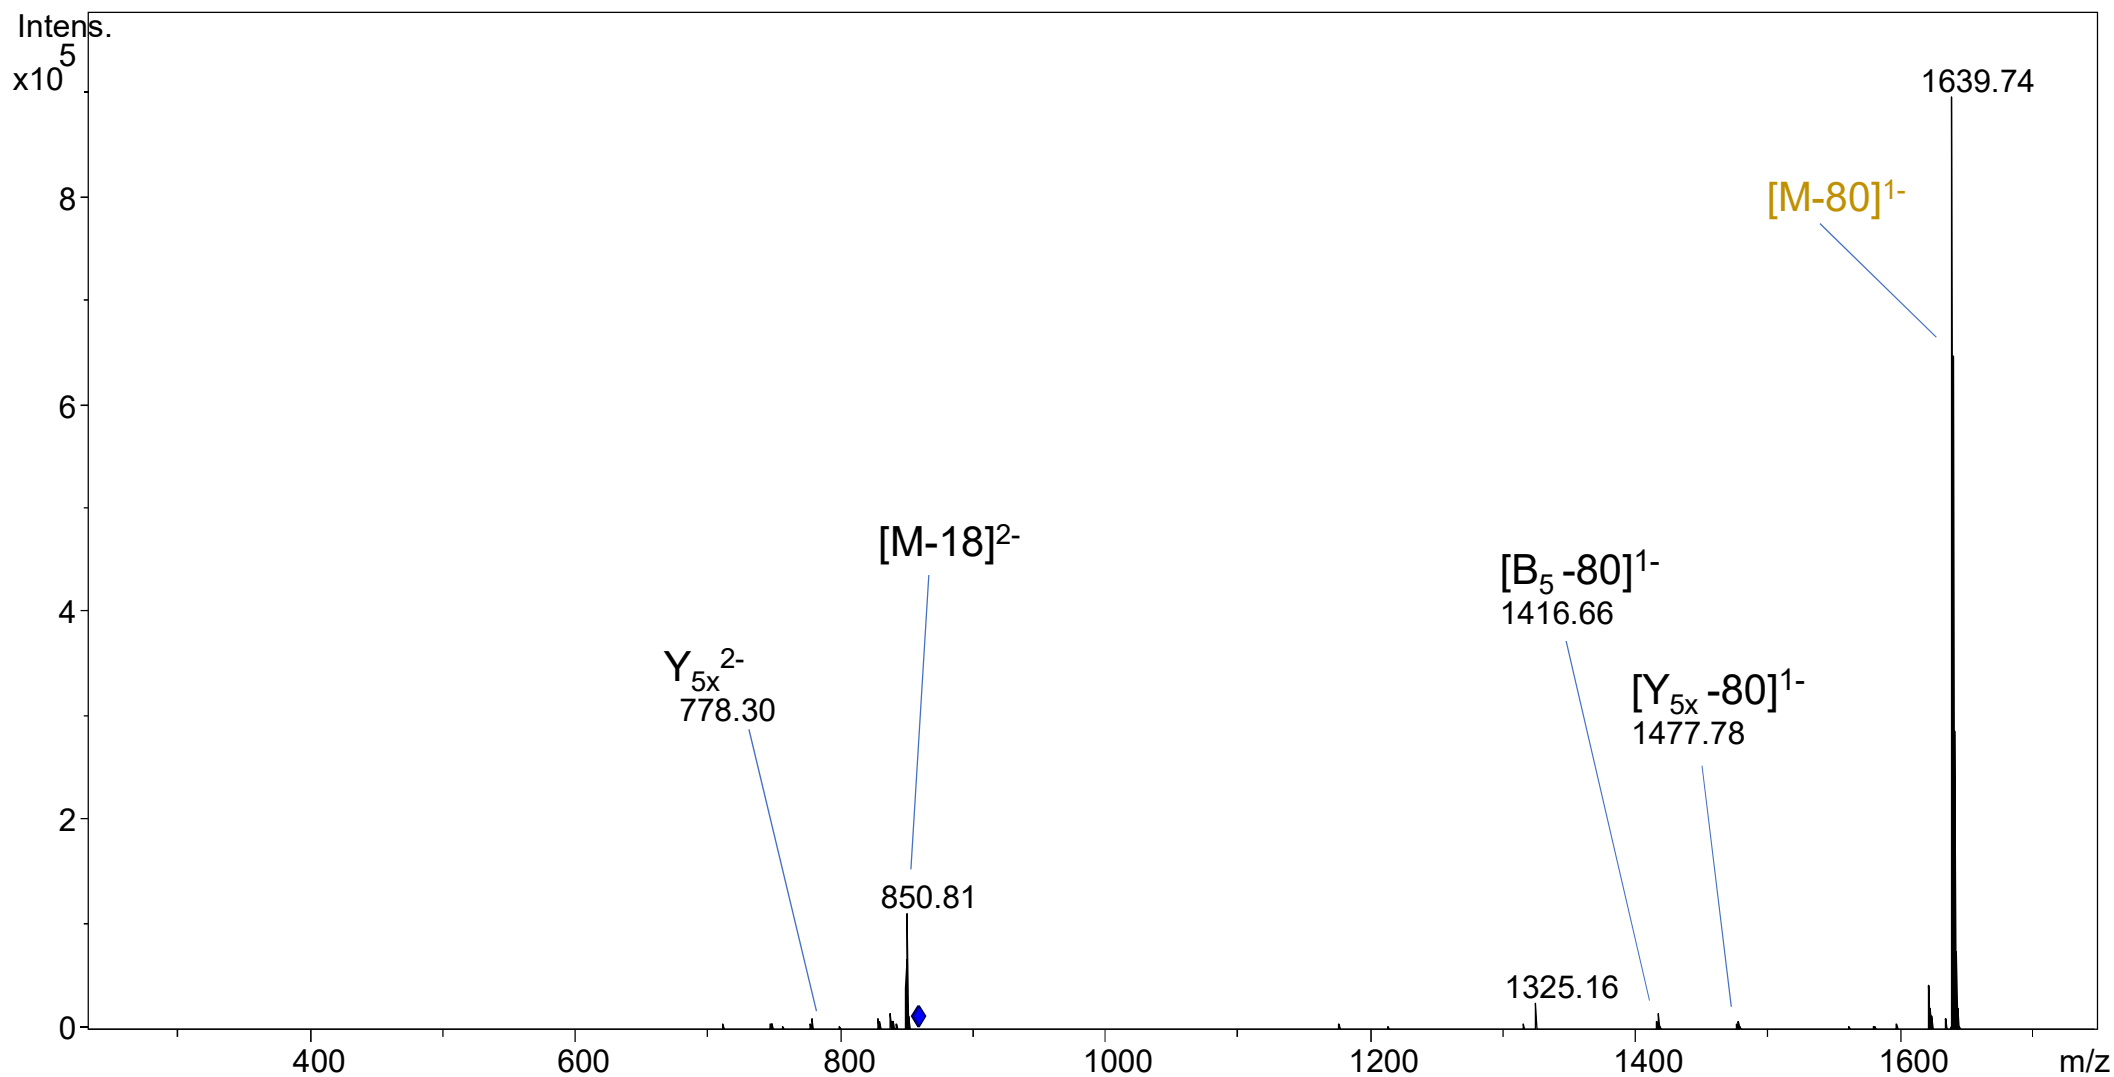

# Glycan 14

## M8P (H8N2P1)

Monoisotopic mass: 1802.57 Da  
 Charge observed: 2-  
 Theoretical ion:  $m/z$  900.28  
 Observed ion:  $m/z$  900.40  
 Mass deviation:  $m/z$  0.12  
 Retention time: 38.6 min

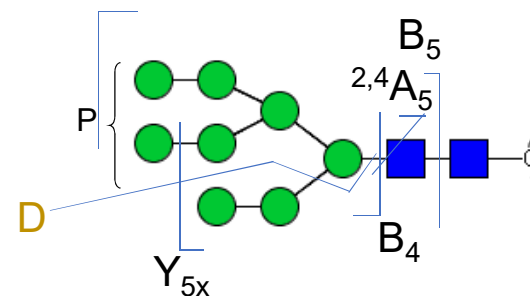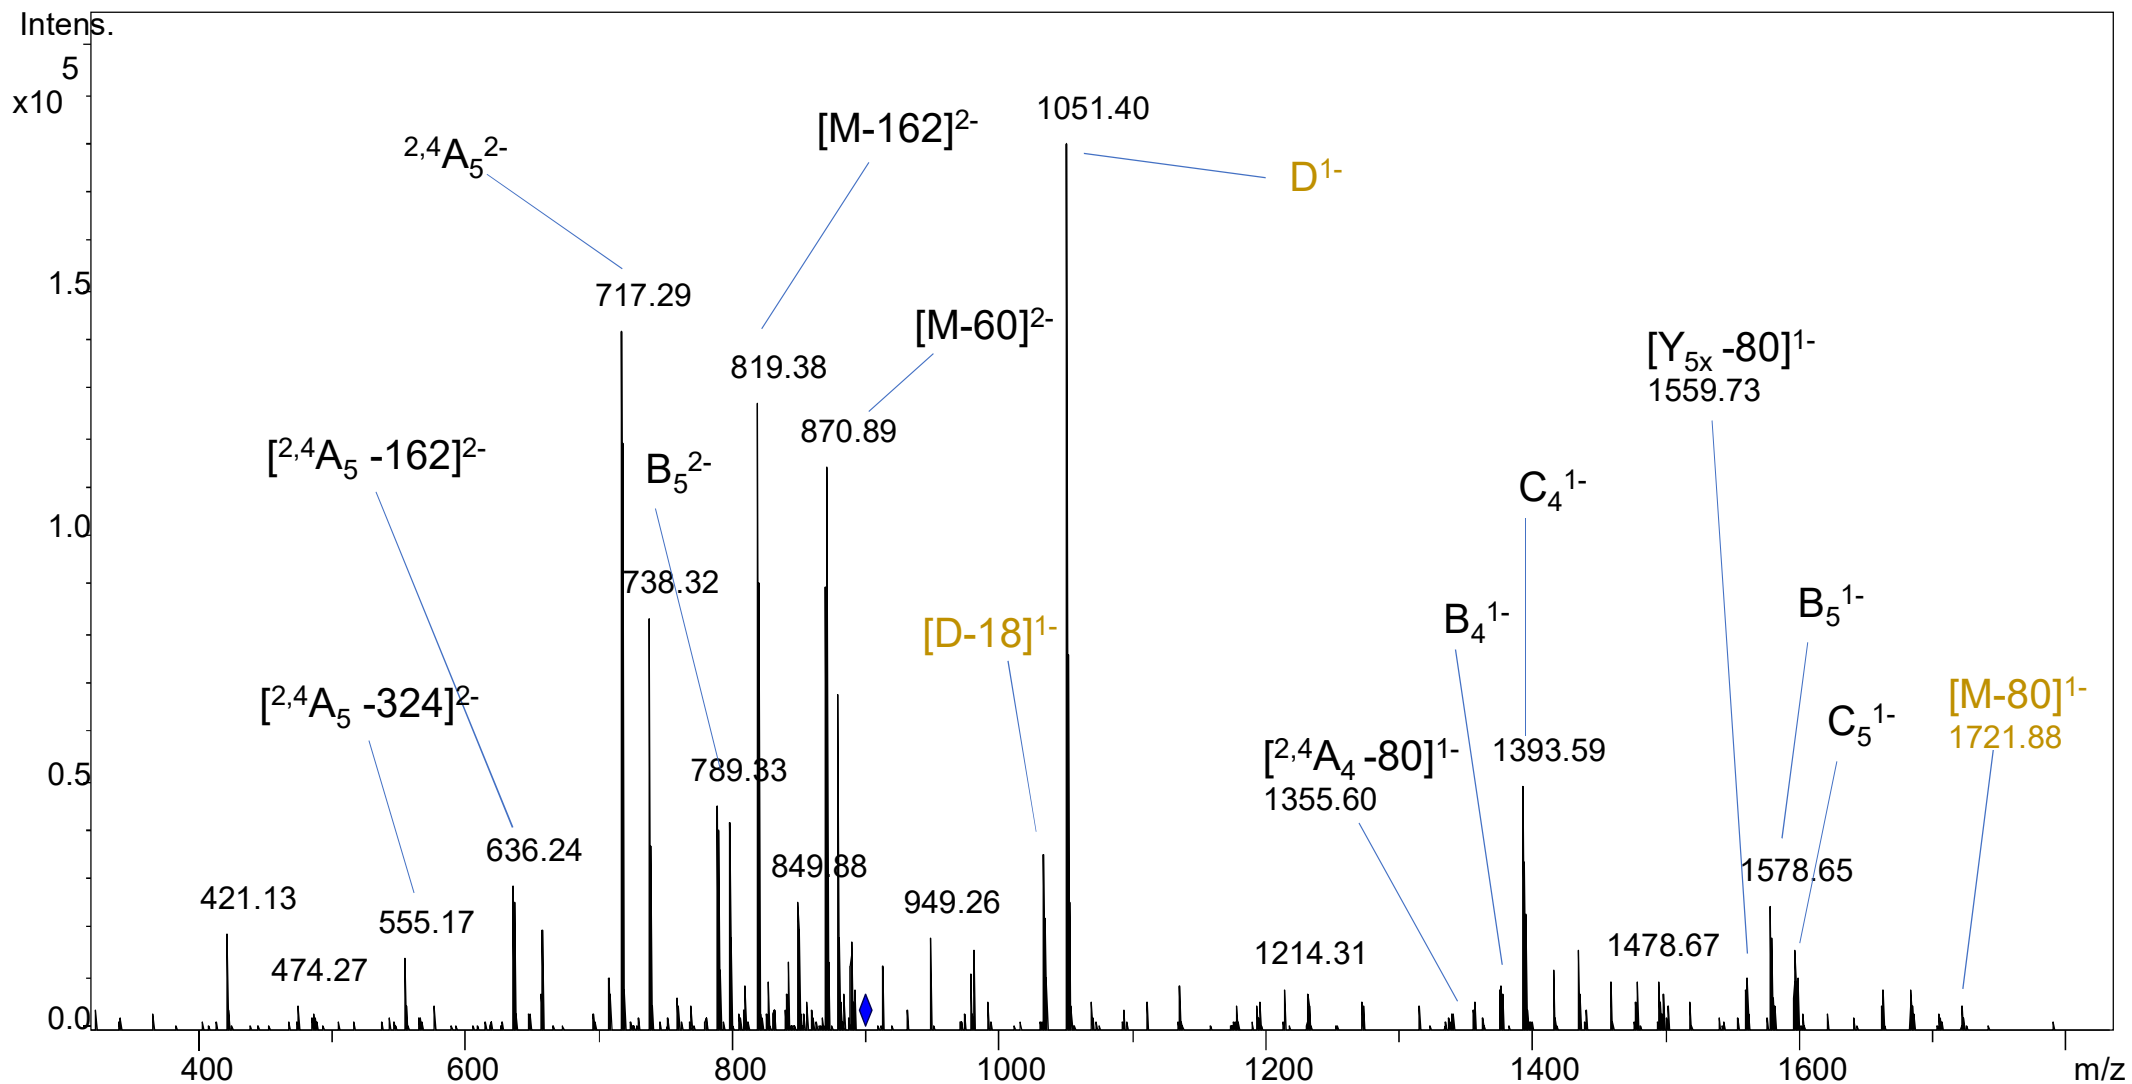

# Glycan 15

M7PGIcNAc  
(H7N3P1)

Monoisotopic mass: 1843.60 Da  
Charge observed: 2-  
Theoretical ion:  $m/z$  920.79  
Observed ion:  $m/z$  920.91  
Mass deviation:  $m/z$  0.12  
Retention time: 42.4 min  
Note: Isomer to glycan 44.

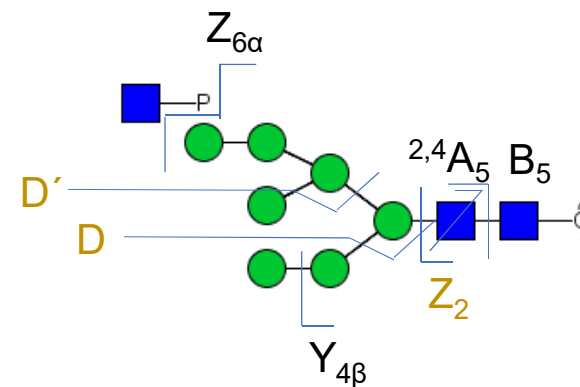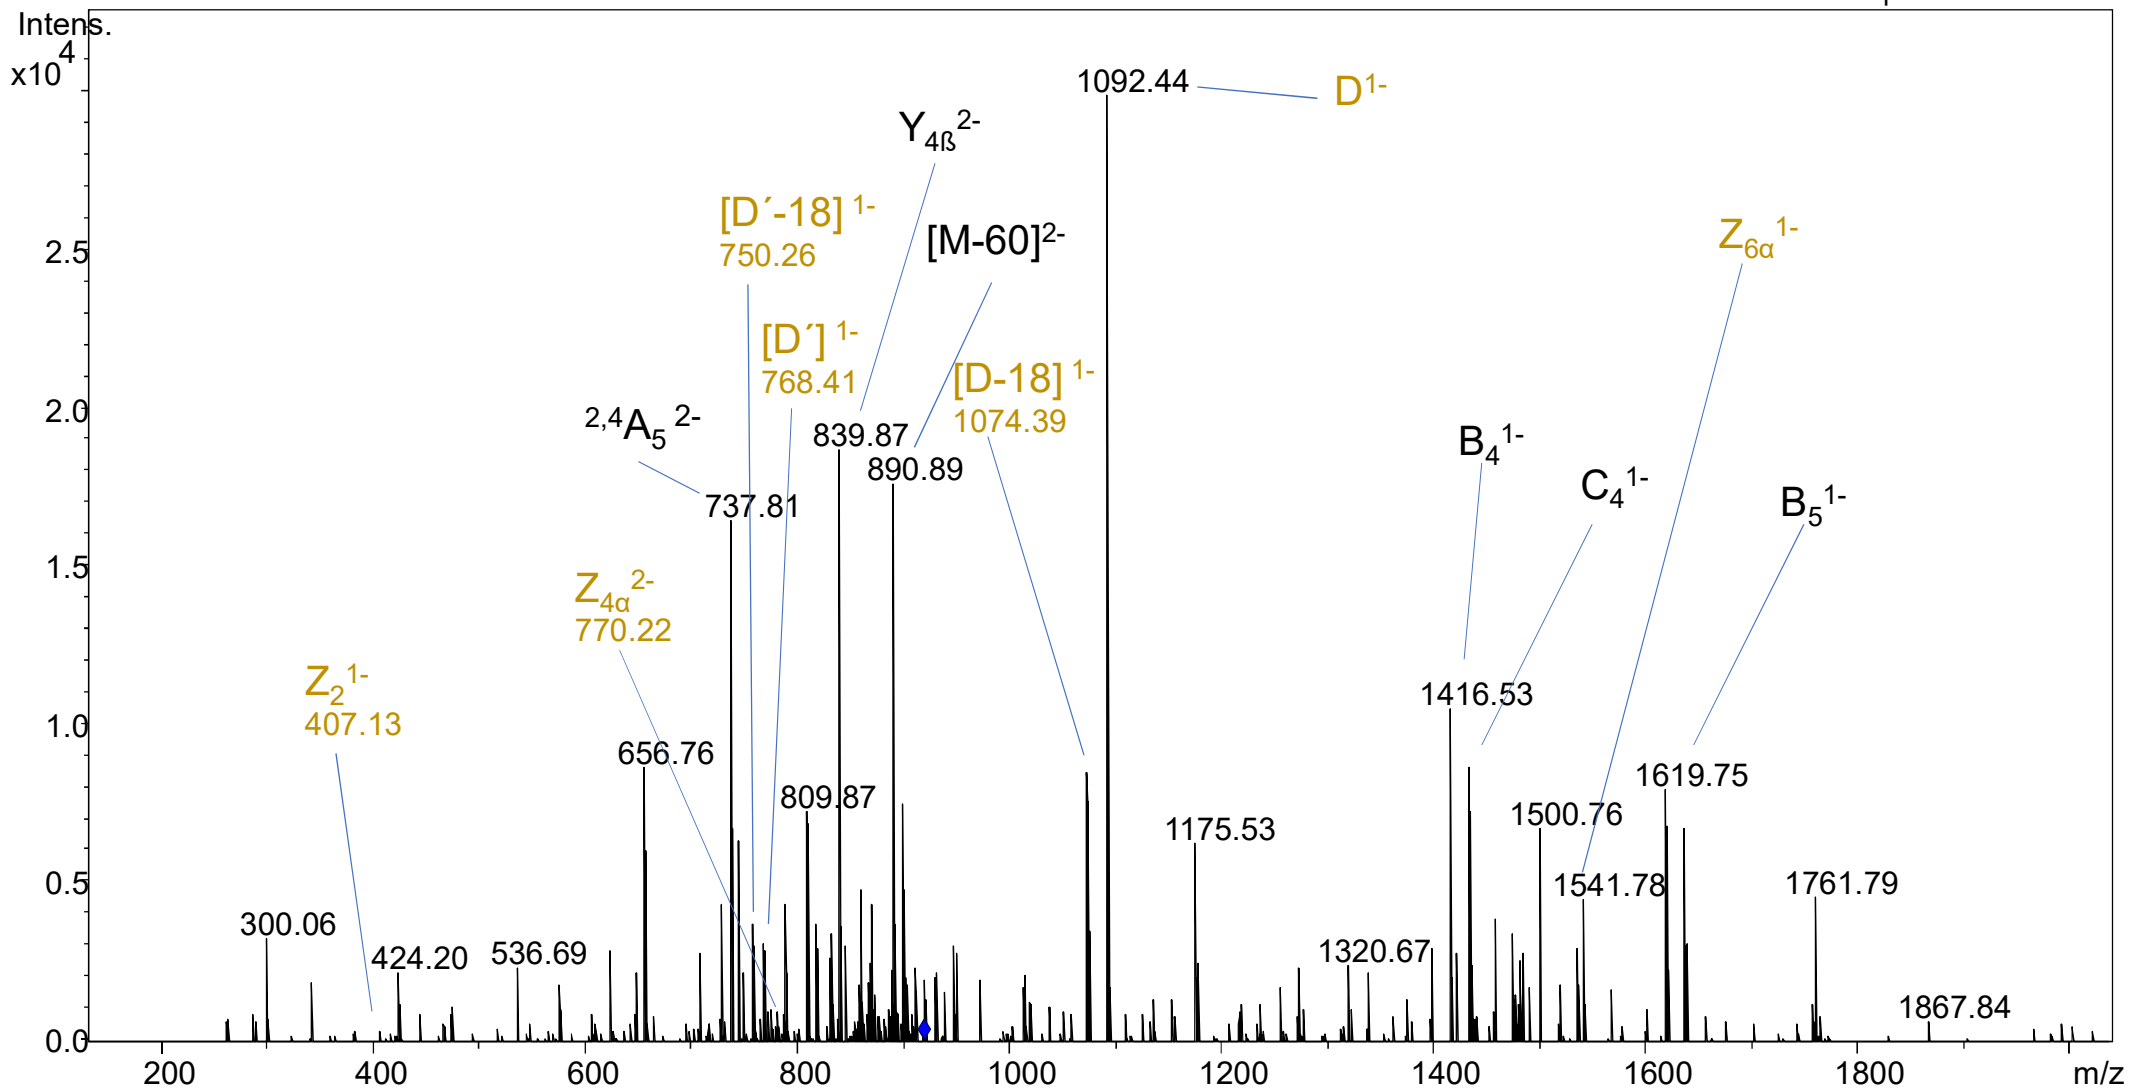

# Glycan 16

M8P2  
(H8N2P2)

Monoisotopic mass: 1882.53 Da  
Charge observed: 2-  
Theoretical ion:  $m/z$  940.26  
Observed ion:  $m/z$  940.37  
Mass deviation:  $m/z$  0.11  
Retention time: 31.4 min

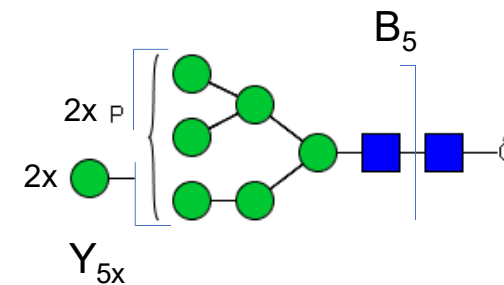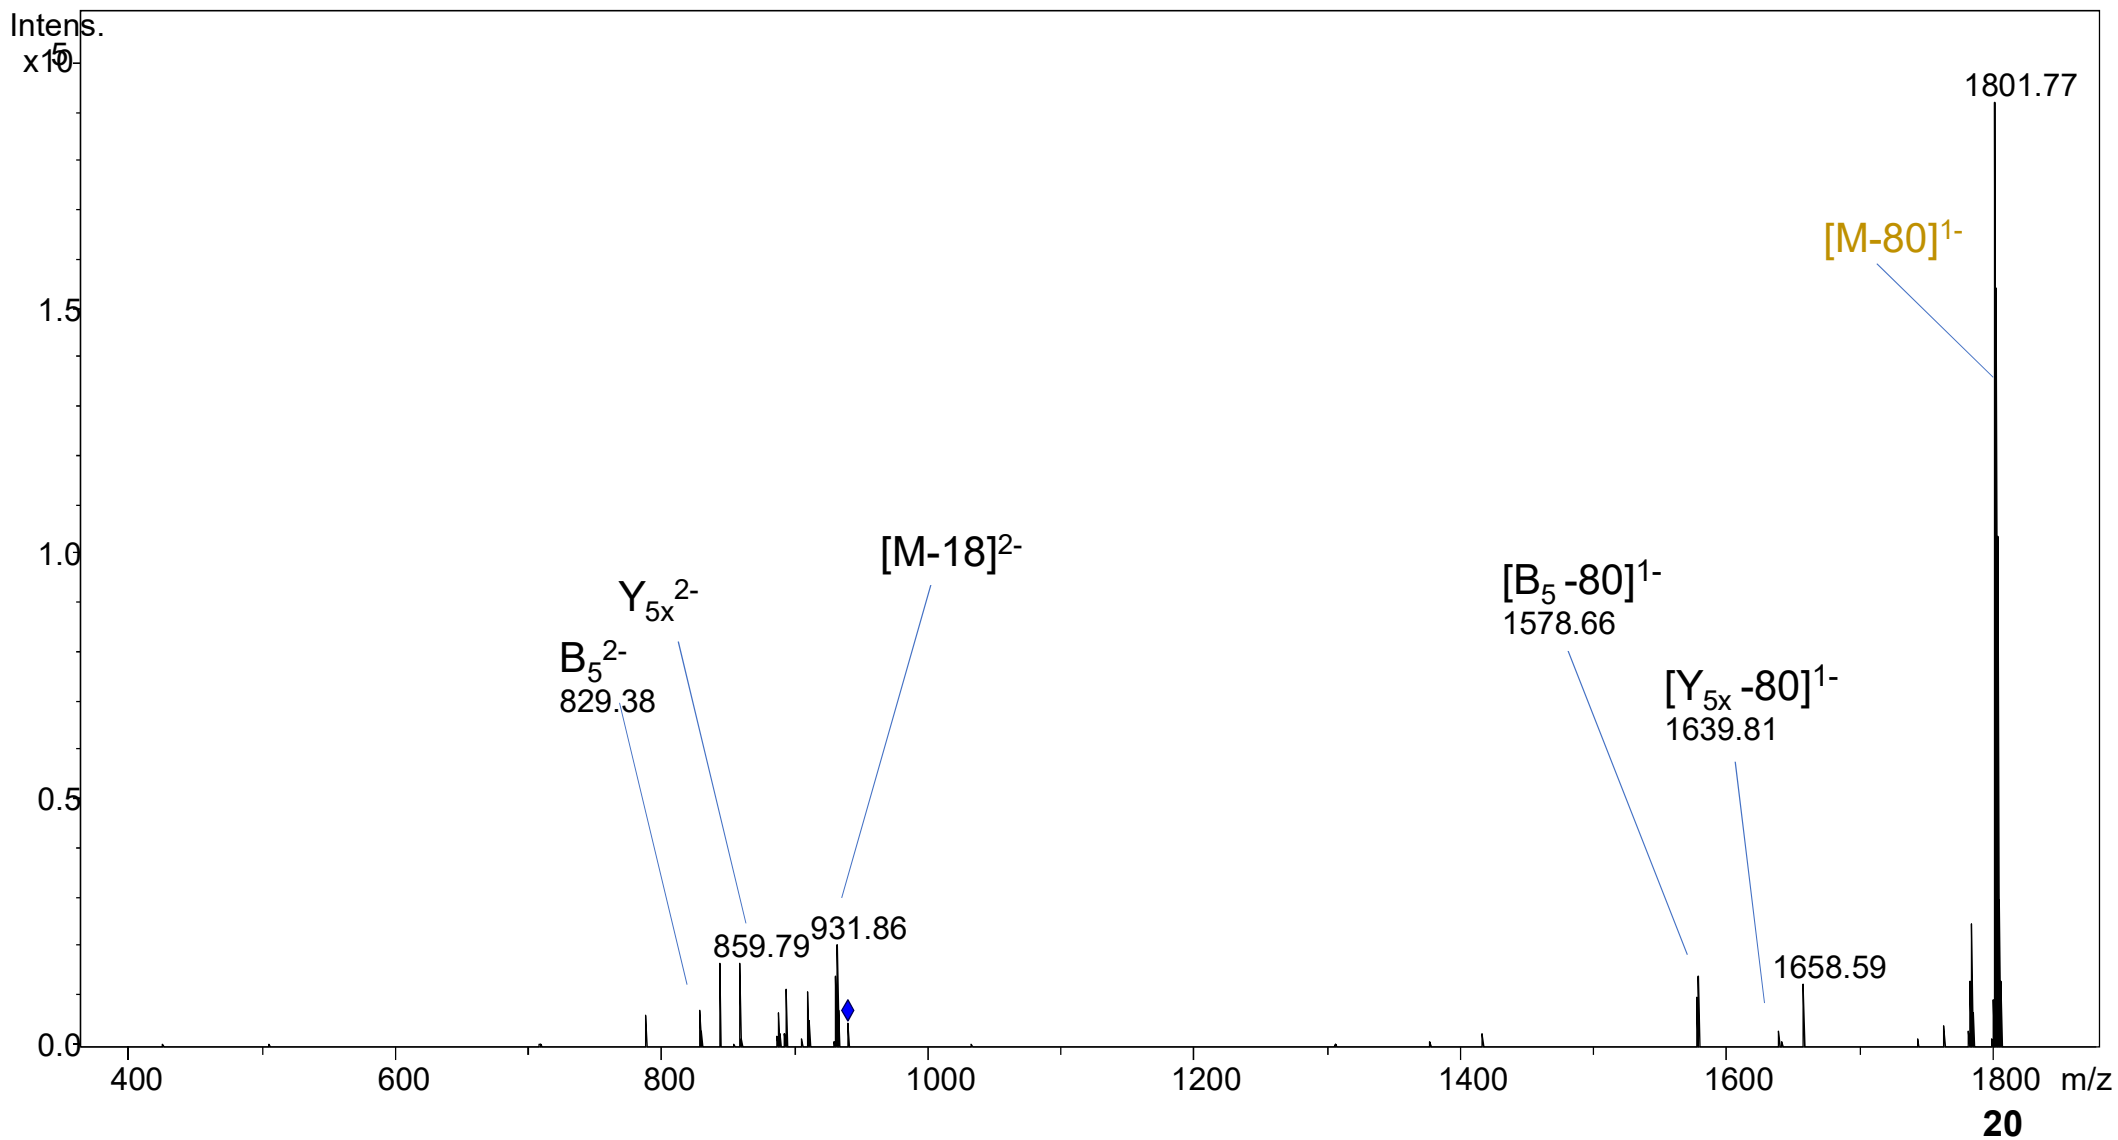



# Glycan 18

A2G2  
(H5N4)

Monoisotopic mass: 1642.61 Da  
Charge observed: 2-  
Theoretical ion:  $m/z$  820.30  
Observed ion:  $m/z$  820.44  
Mass deviation:  $m/z$  0.14  
Retention time: 55.9 min

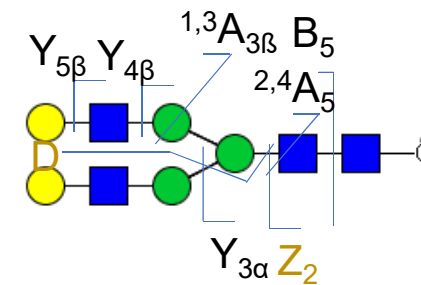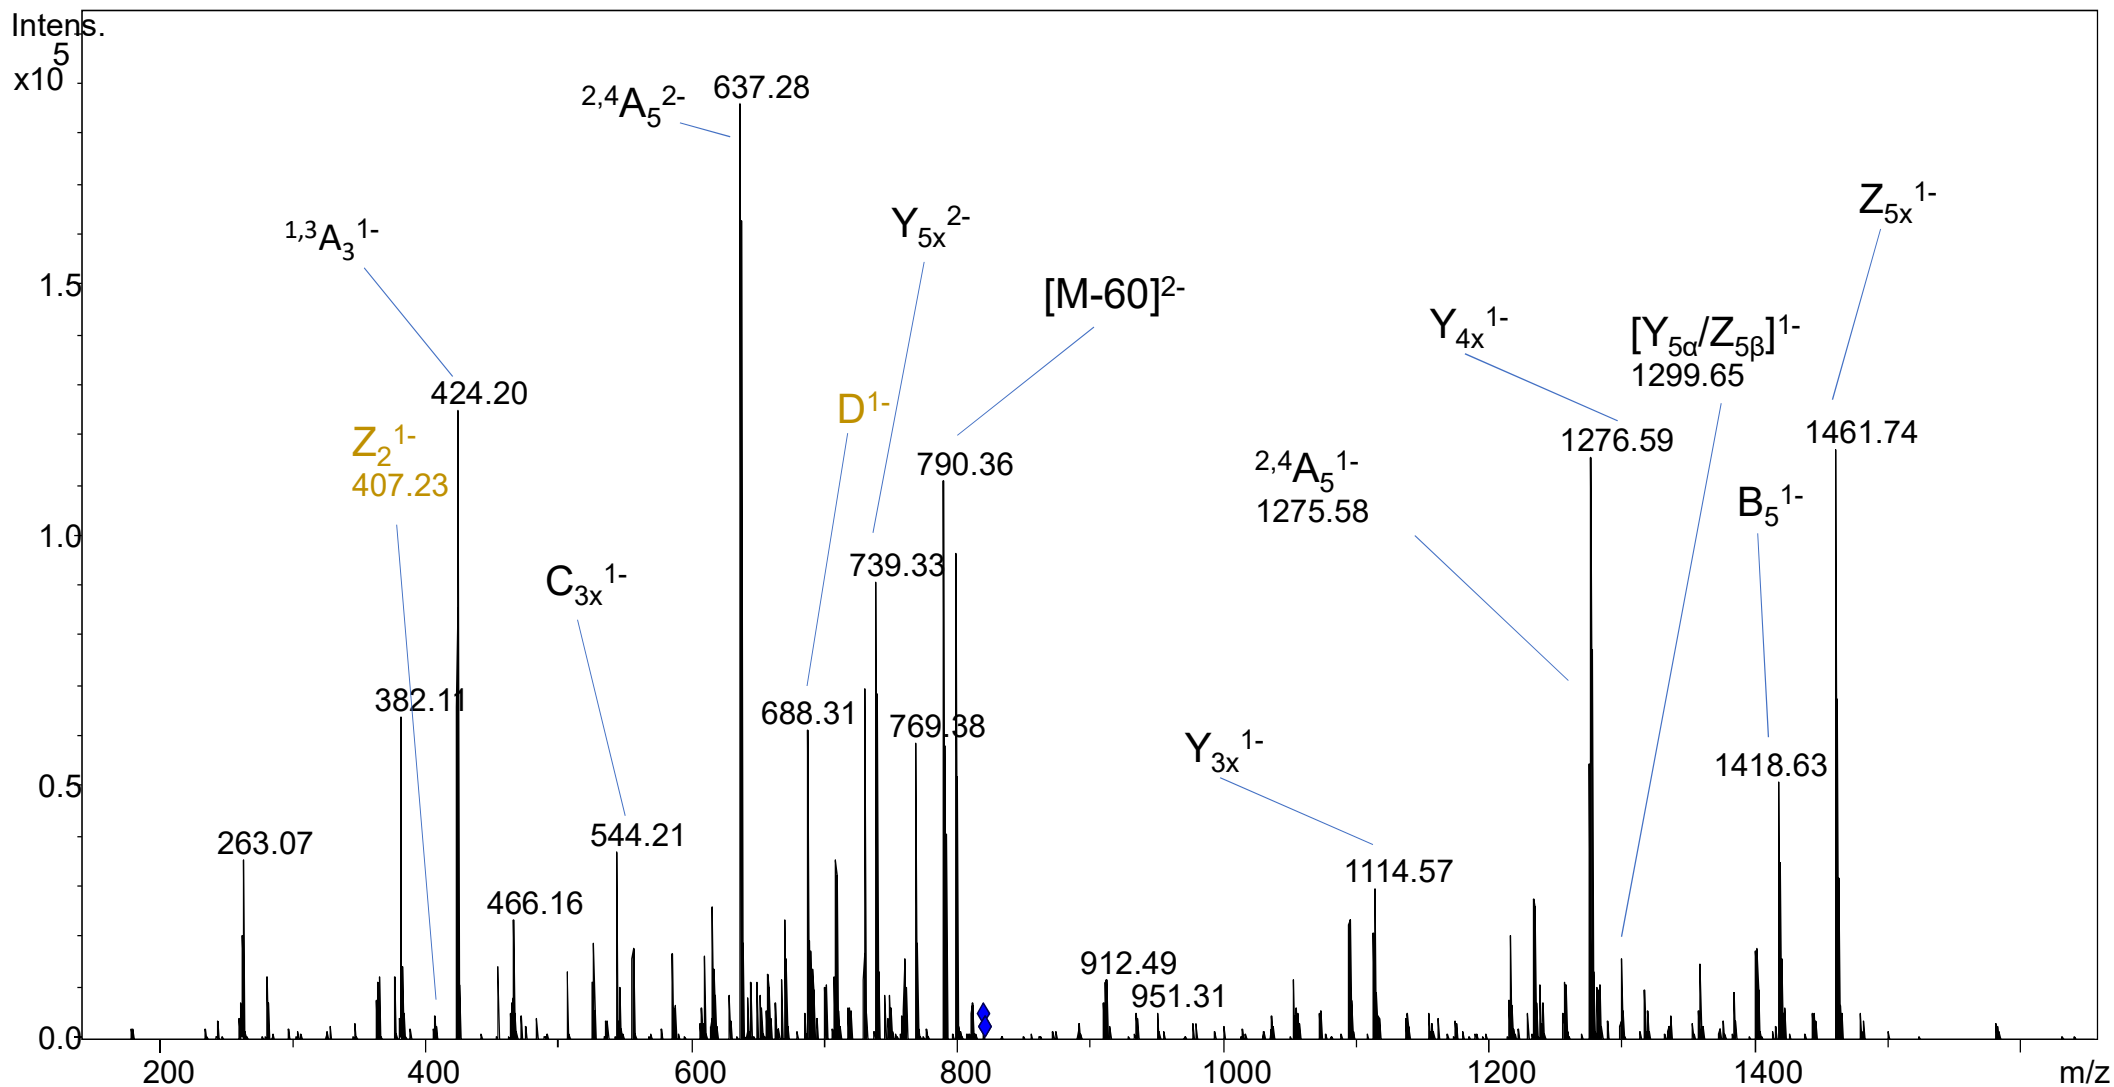



# Glycan 19b

A1S1  
(H4N4S1)

Monoisotopic mass: 1771.64 Da  
Charge observed: 1-  
Theoretical ion:  $m/z$  884.82  
Observed ion:  $m/z$  884.97  
Mass deviation:  $m/z$  0.13  
Retention time: 61.6 min

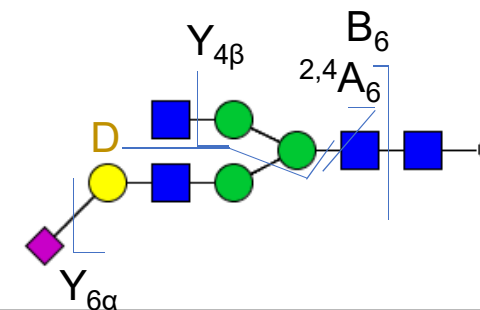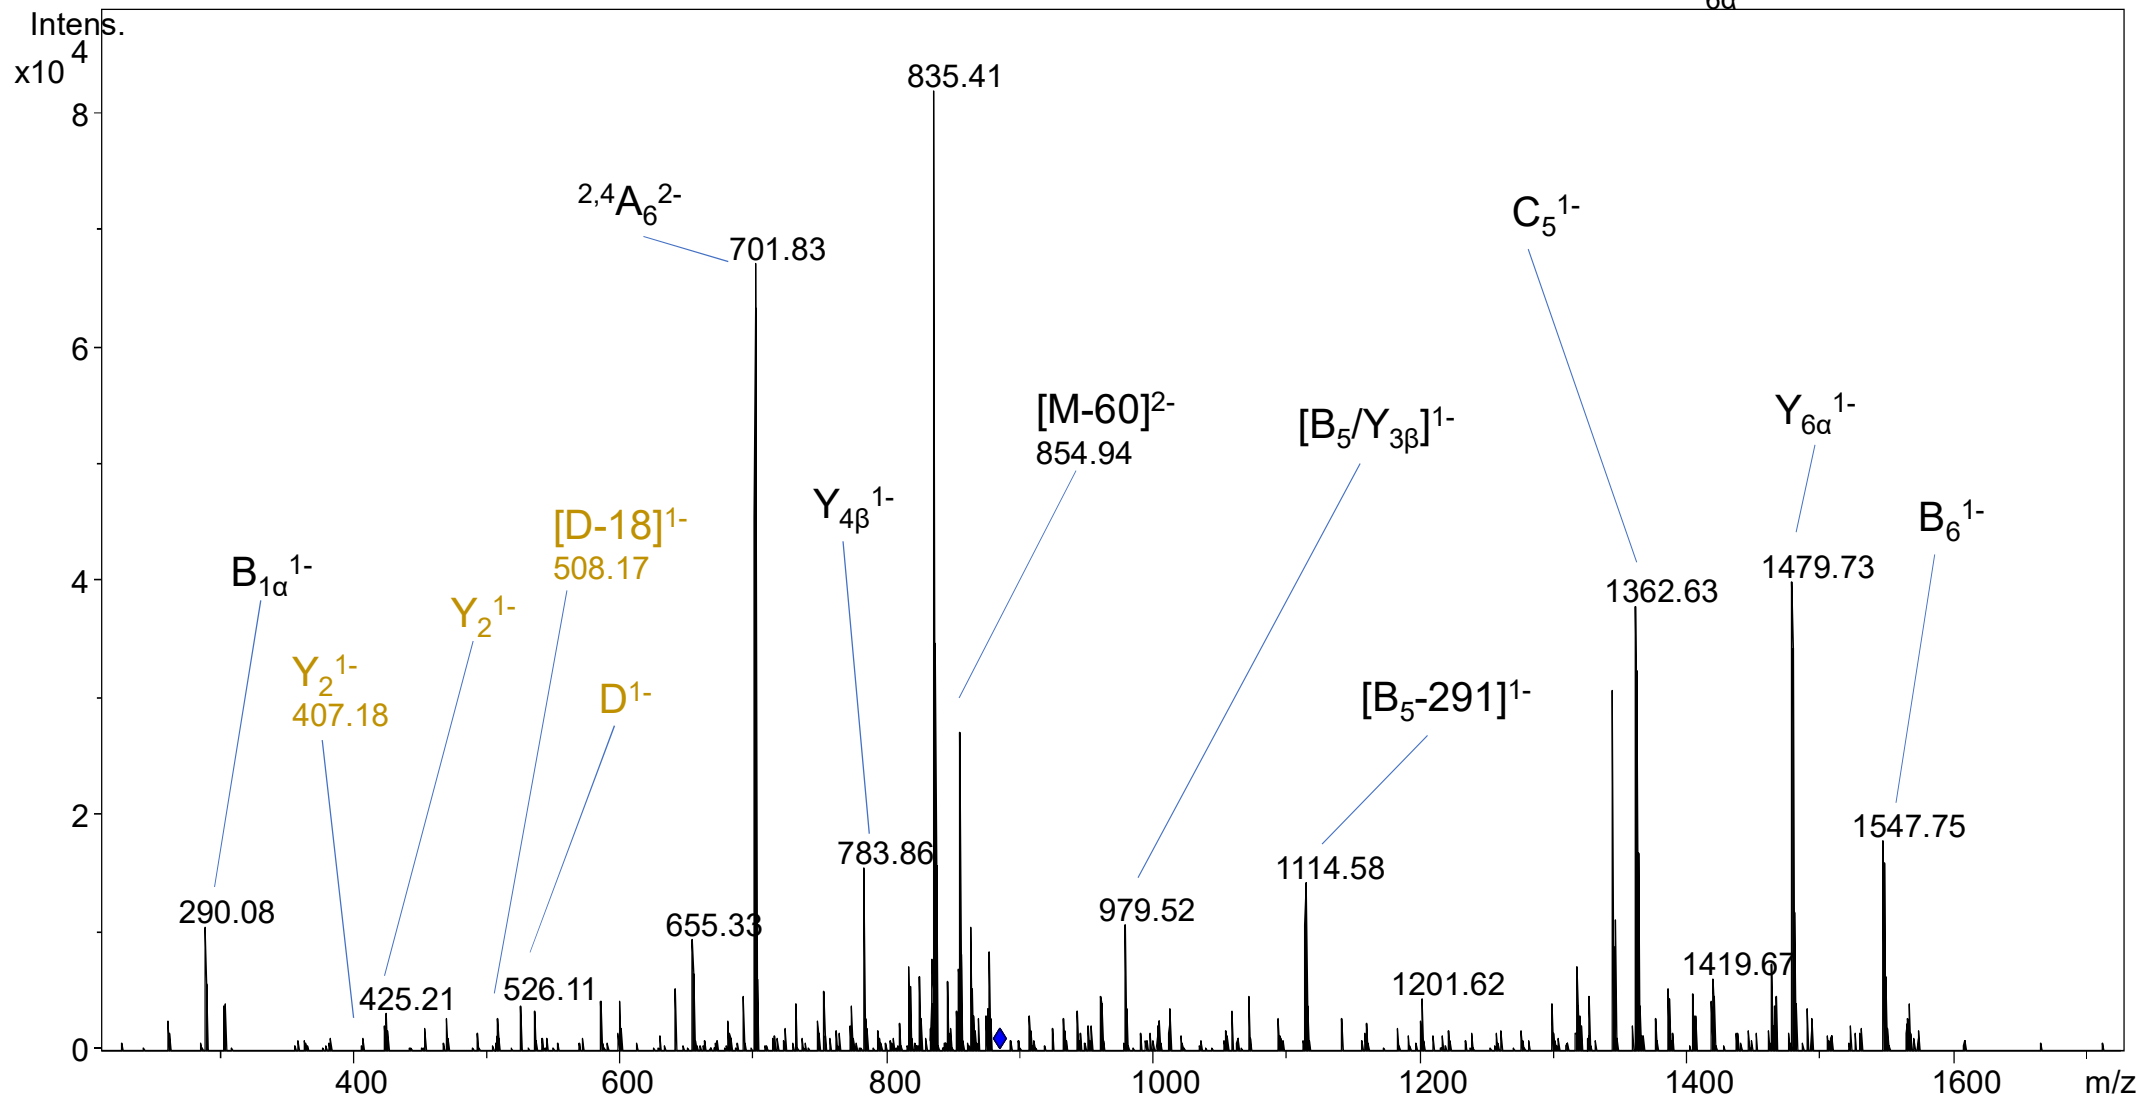



# Glycan 20

A2G2F  
(H5N4F1)

Monoisotopic mass: 1788.67 Da  
Charge observed: 2-  
Theoretical ion:  $m/z$  893.32  
Observed ion:  $m/z$  893.46  
Mass deviation:  $m/z$  0.14  
Retention time: 63.3 min

UniCarb-DB: #425

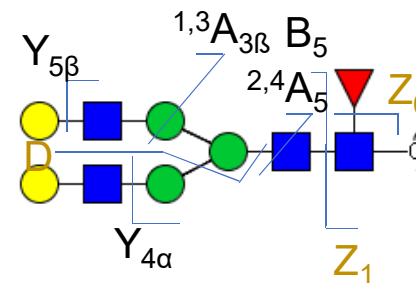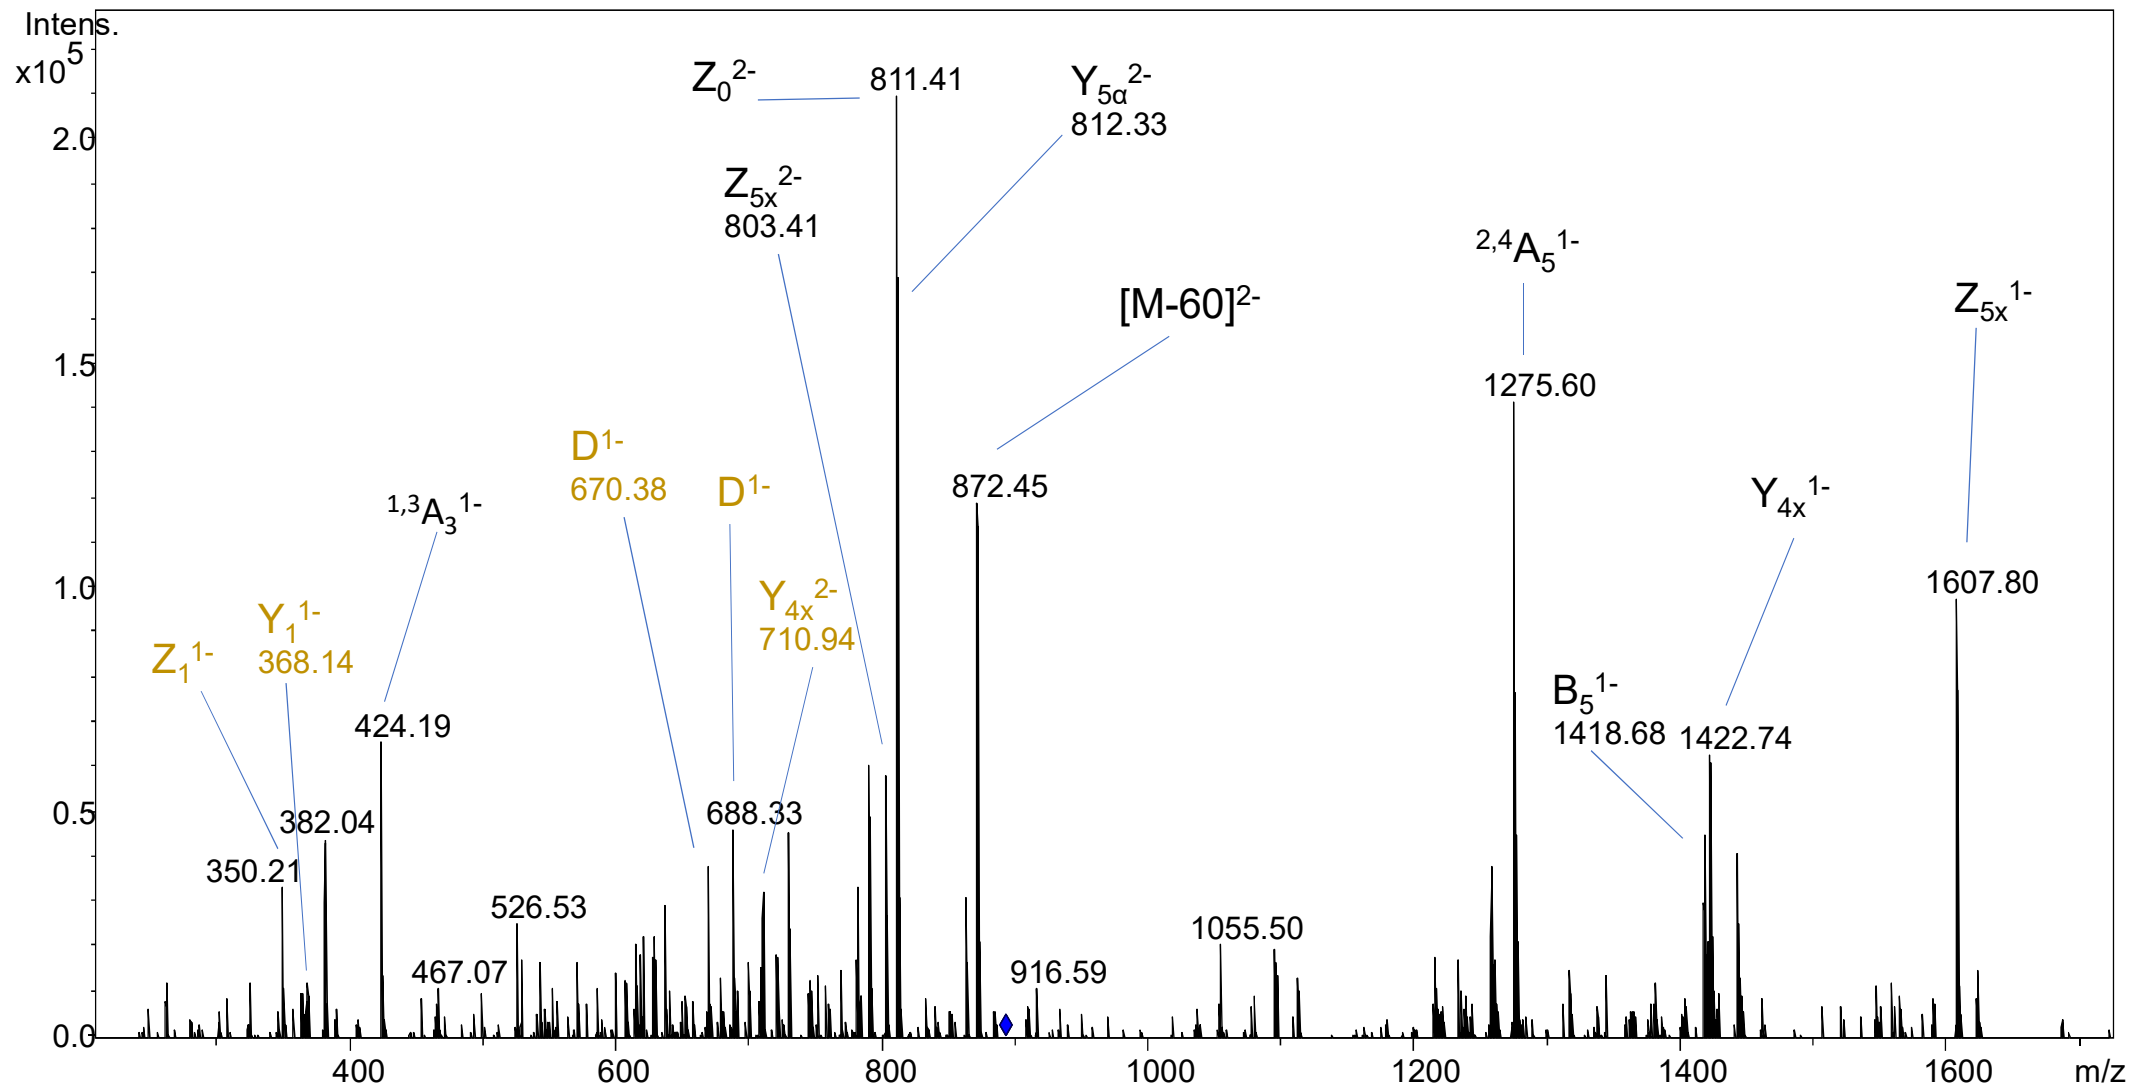

# Glycan 21

A2G1S1  
(H5N4S1)

Monoisotopic mass: 1933.70 Da  
Charge observed: 2-  
Theoretical ion:  $m/z$  965.84  
Observed ion:  $m/z$  965.99  
Mass deviation:  $m/z$  0.15  
Retention time: 63.8 min

UniCarb-DB: #2338

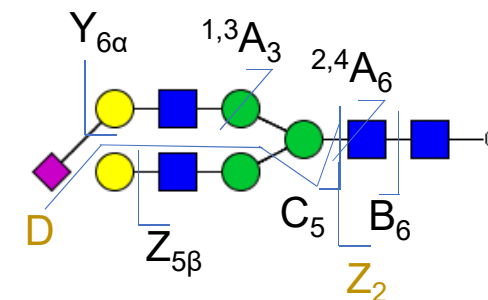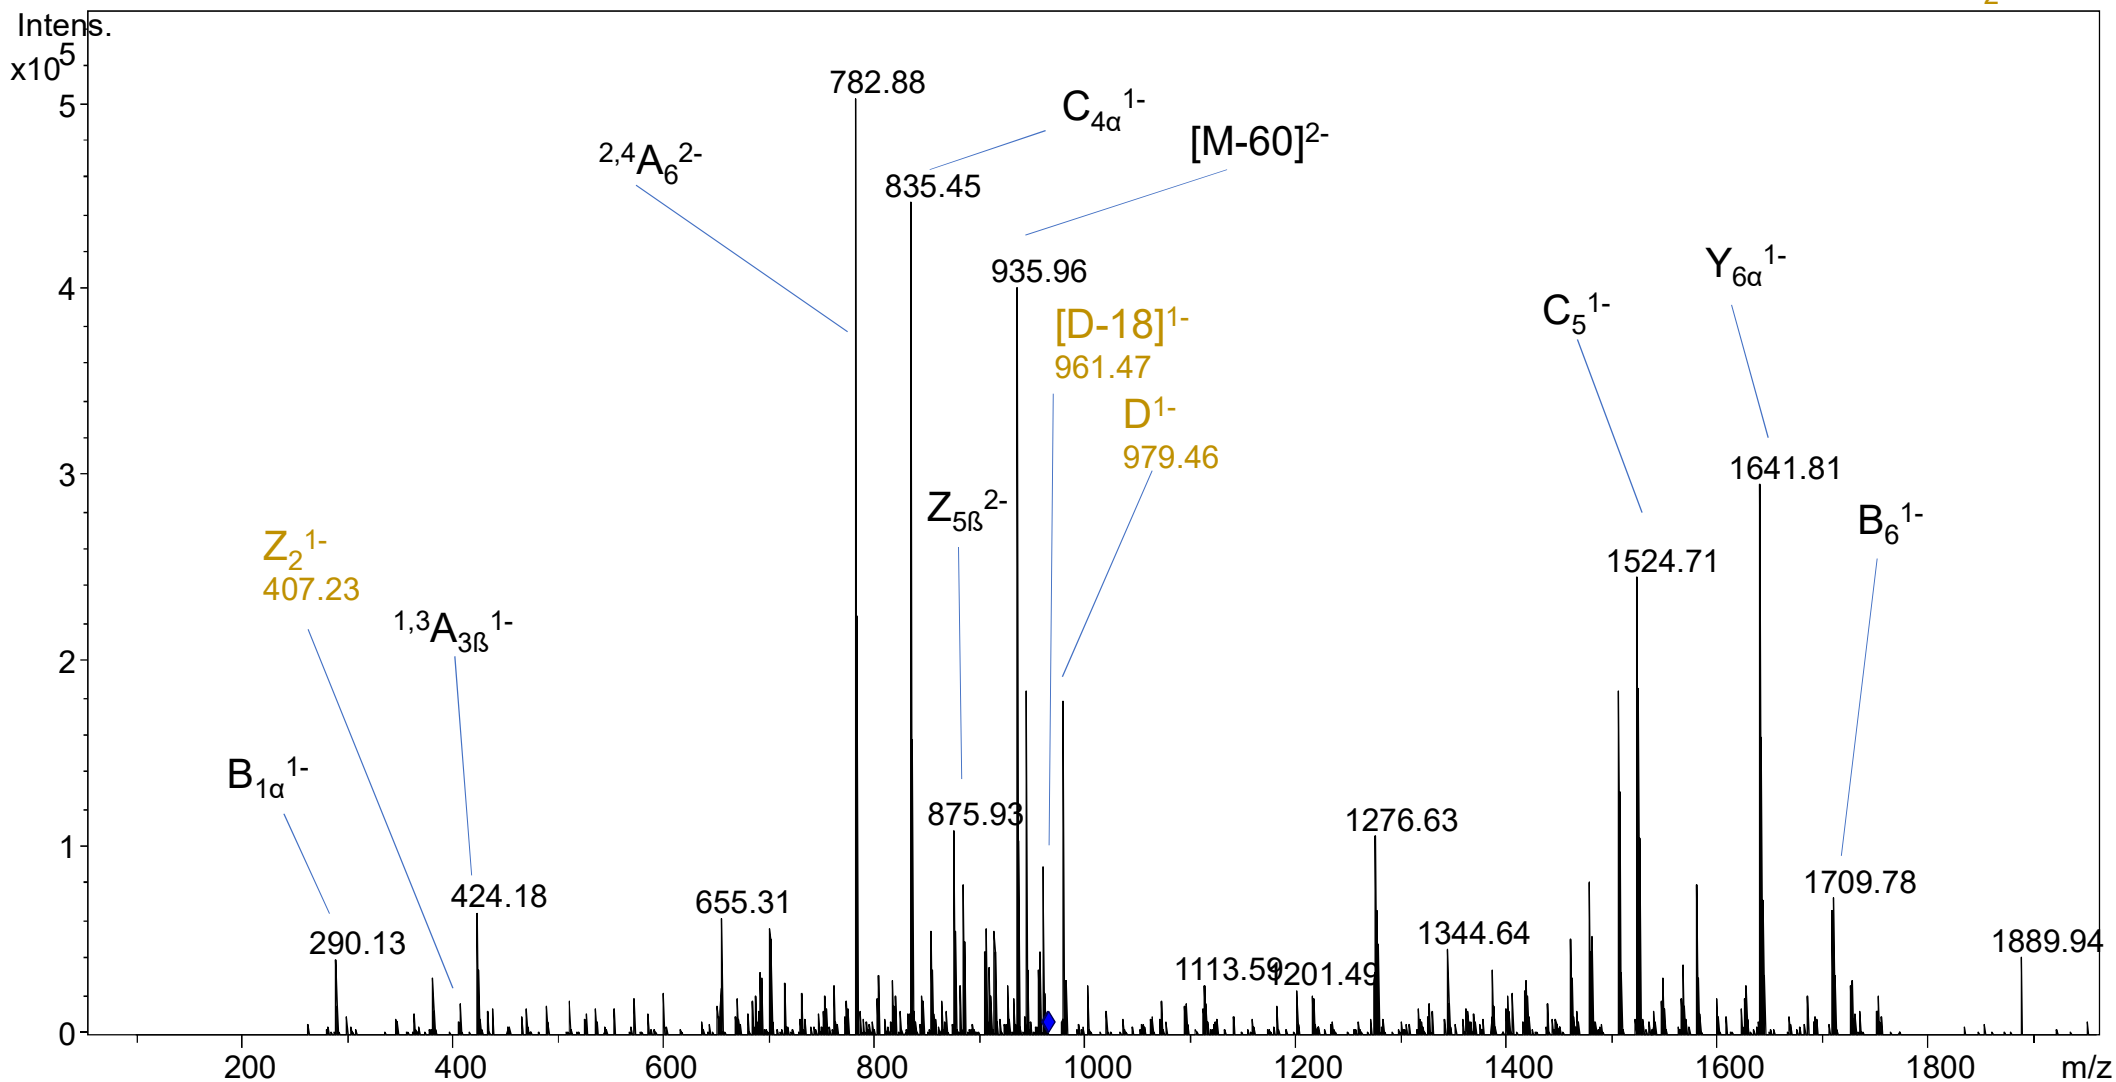

# Glycan 22

A2G1S1Ac2  
(H5N4S1Ac2)

Monoisotopic mass: 2017.72 Da  
Charge observed: 2-  
Theoretical ion:  $m/z$  1007.86  
Observed ion:  $m/z$  1007.92  
Mass deviation:  $m/z$  0.08  
Retention time: 63.9 min  
Note: No insightful MS2 available.

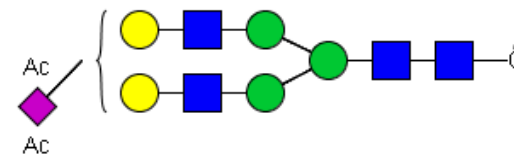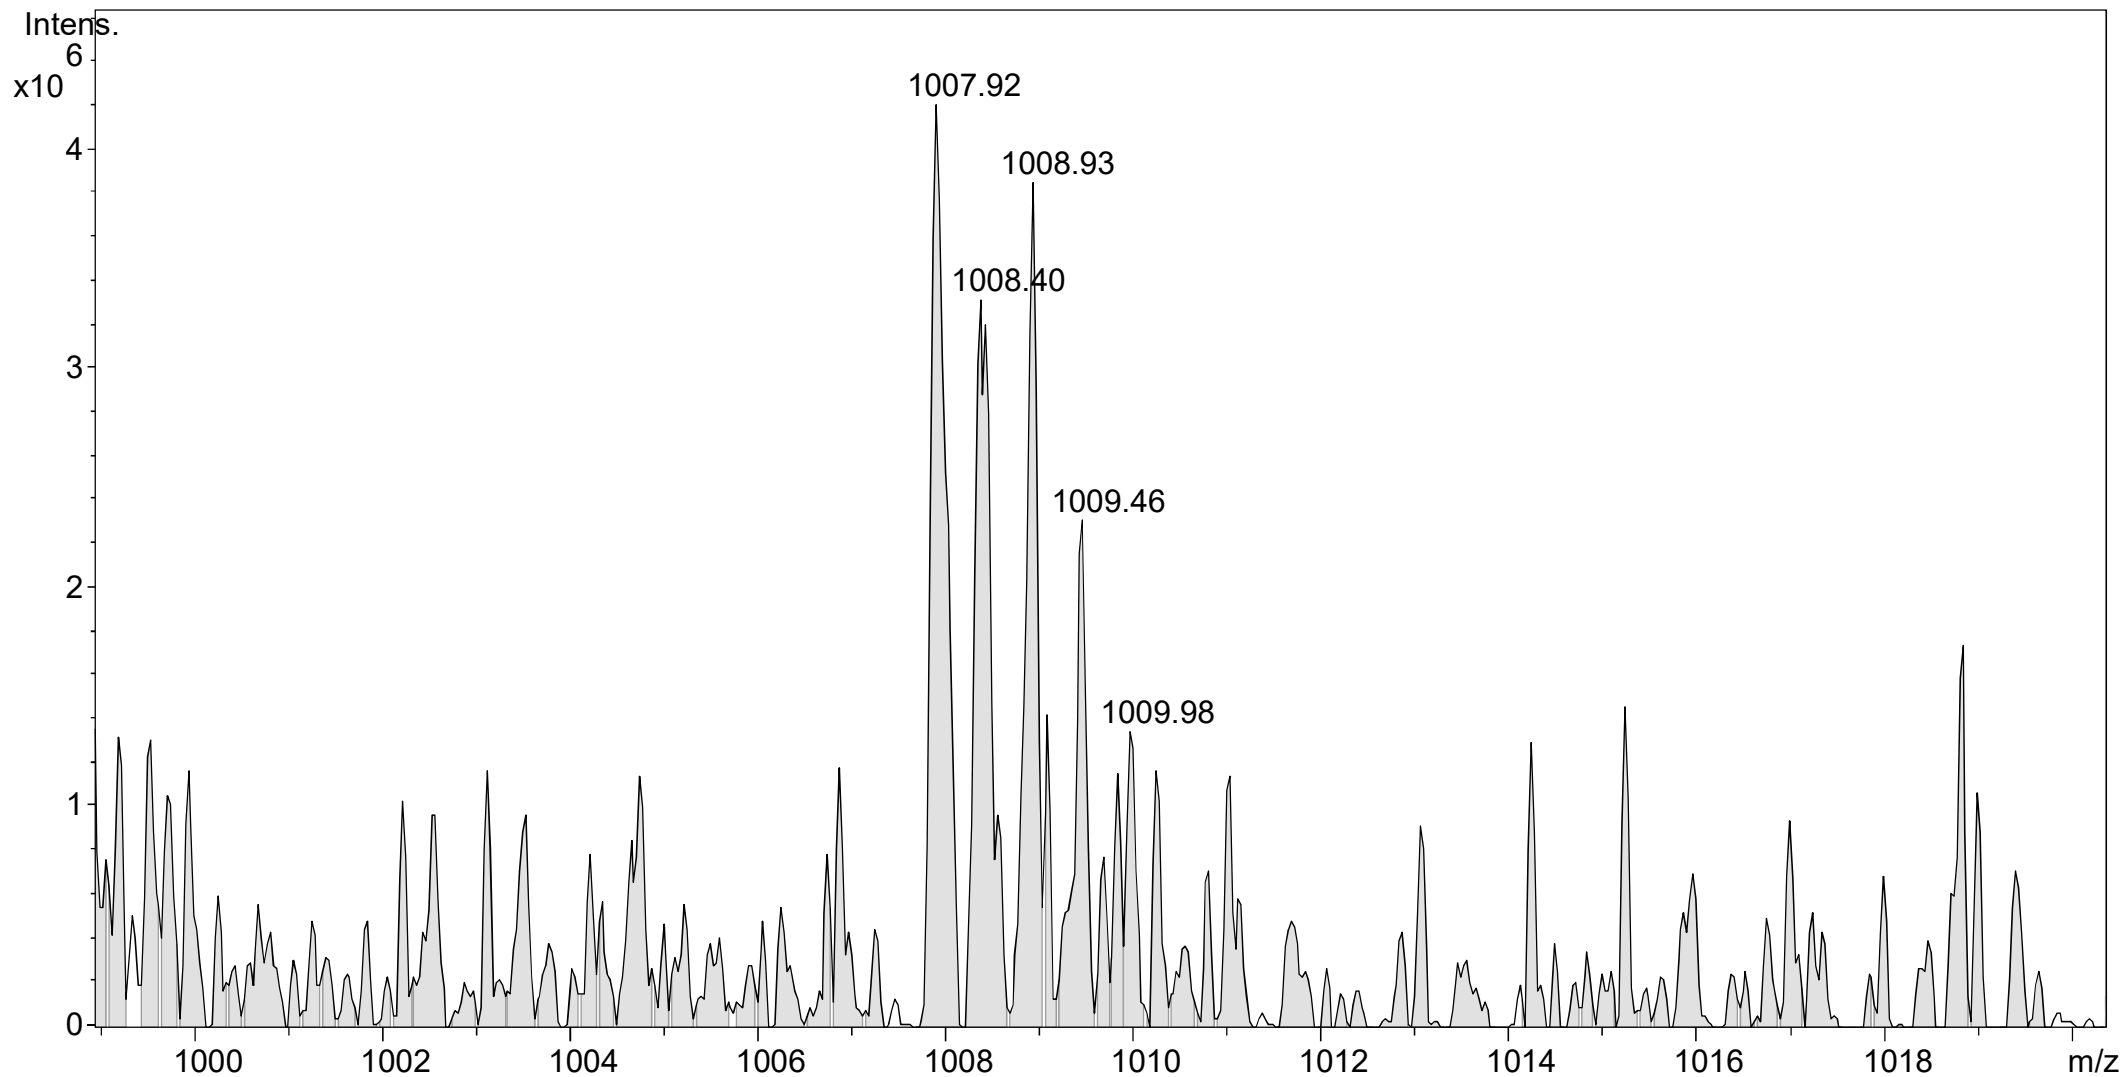

# Glycan 23

A2G1S1F  
(H5N4F1S1)

Monoisotopic mass: 2079.76 Da  
Charge observed: 2-  
Theoretical ion:  $m/z$  1038.87  
Observed ion:  $m/z$  1039.00  
Mass deviation:  $m/z$  0.13  
Retention time: 69.6 min

UniCarb-DB: #2364

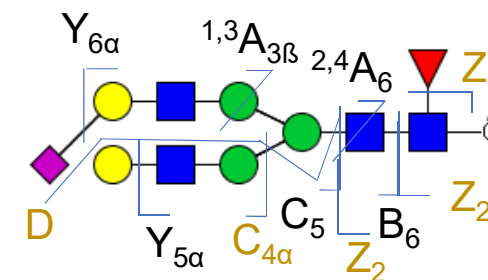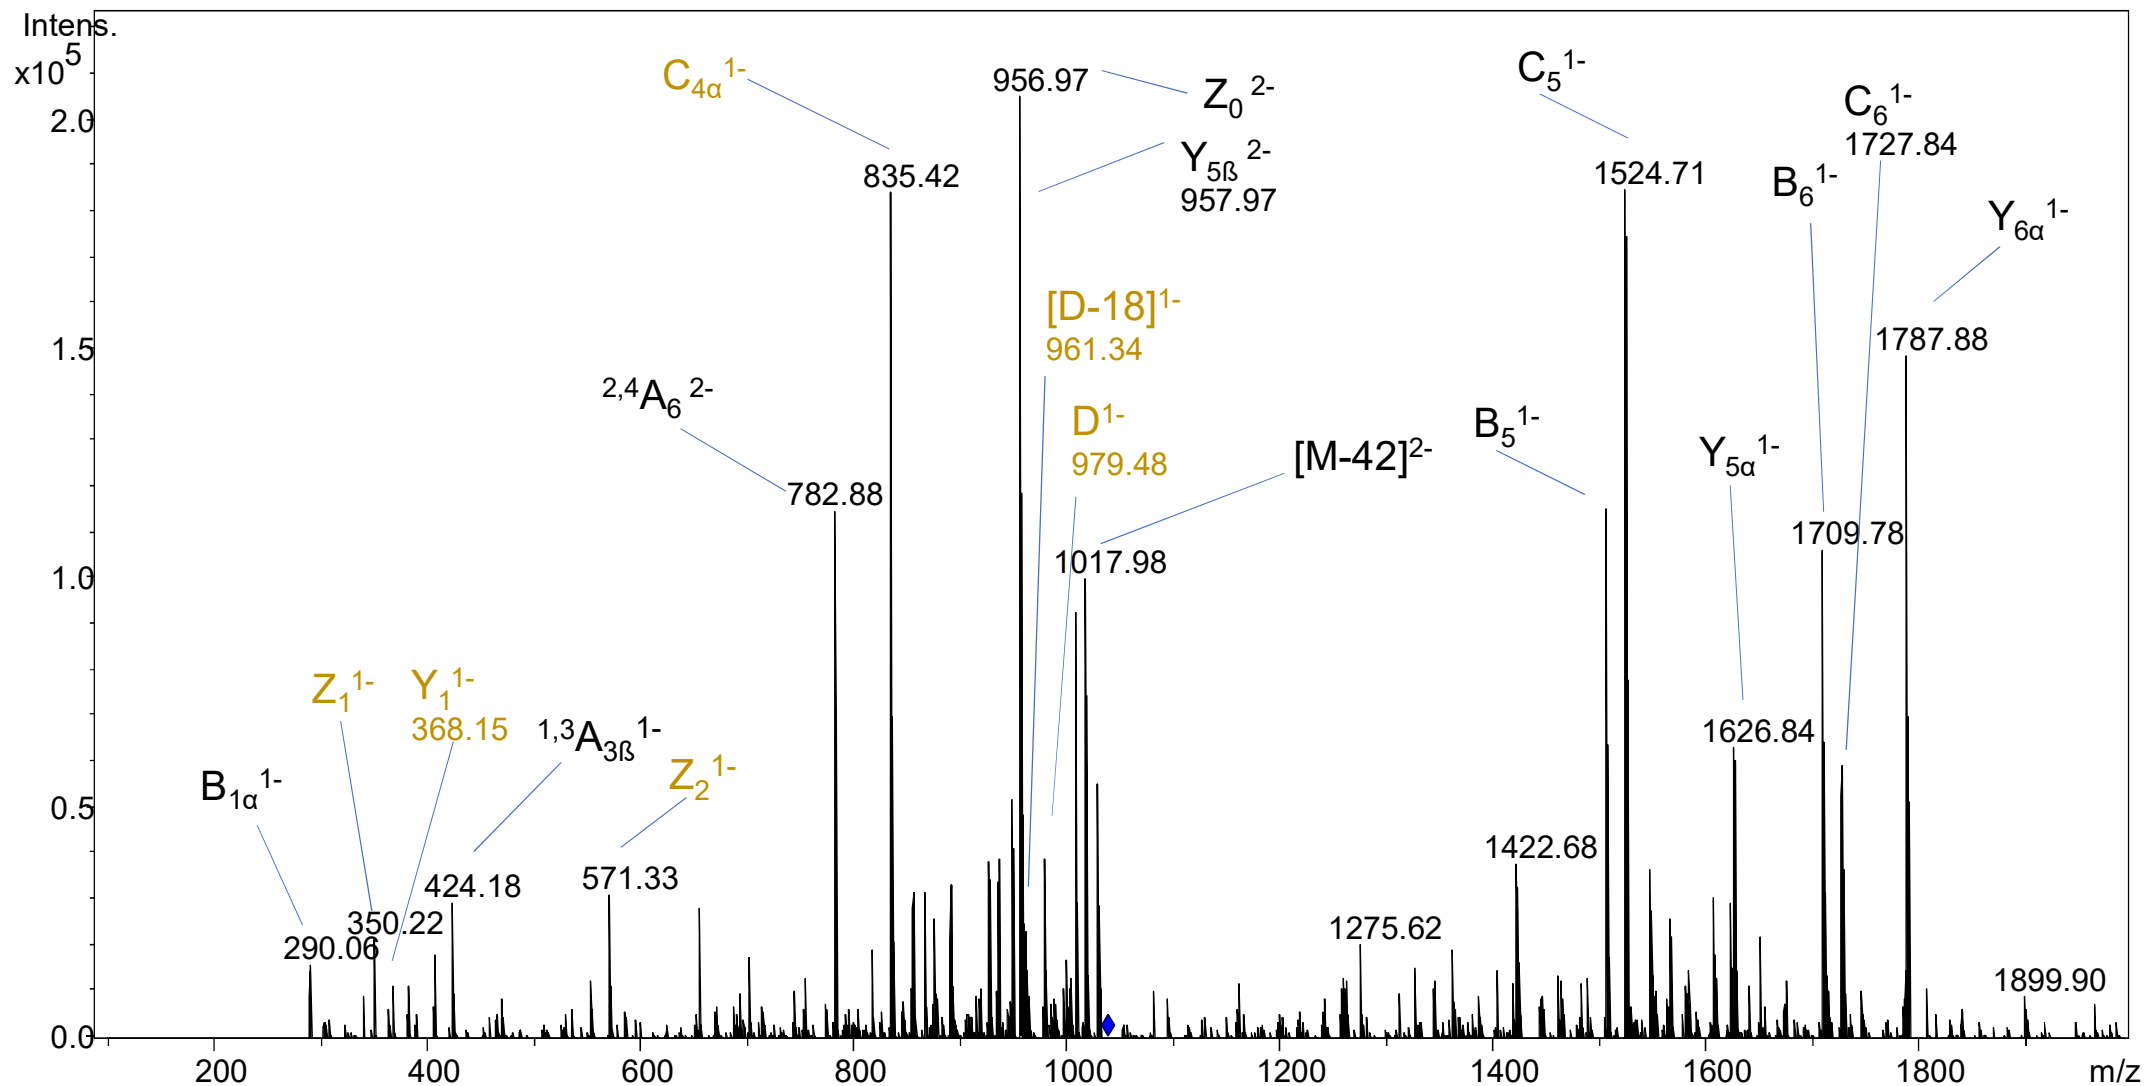

# Glycan 24

A2G1S1FAc2  
(H5N4F1S1Ac2)

Monoisotopic mass: 2163.78 Da  
Charge observed: 2-  
Theoretical ion:  $m/z$  1080.88  
Observed ion:  $m/z$  1080.96  
Mass deviation:  $m/z$  0.08  
Retention time: 69.3 min  
Note: No insightful MS2 available.

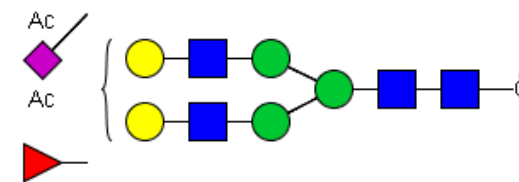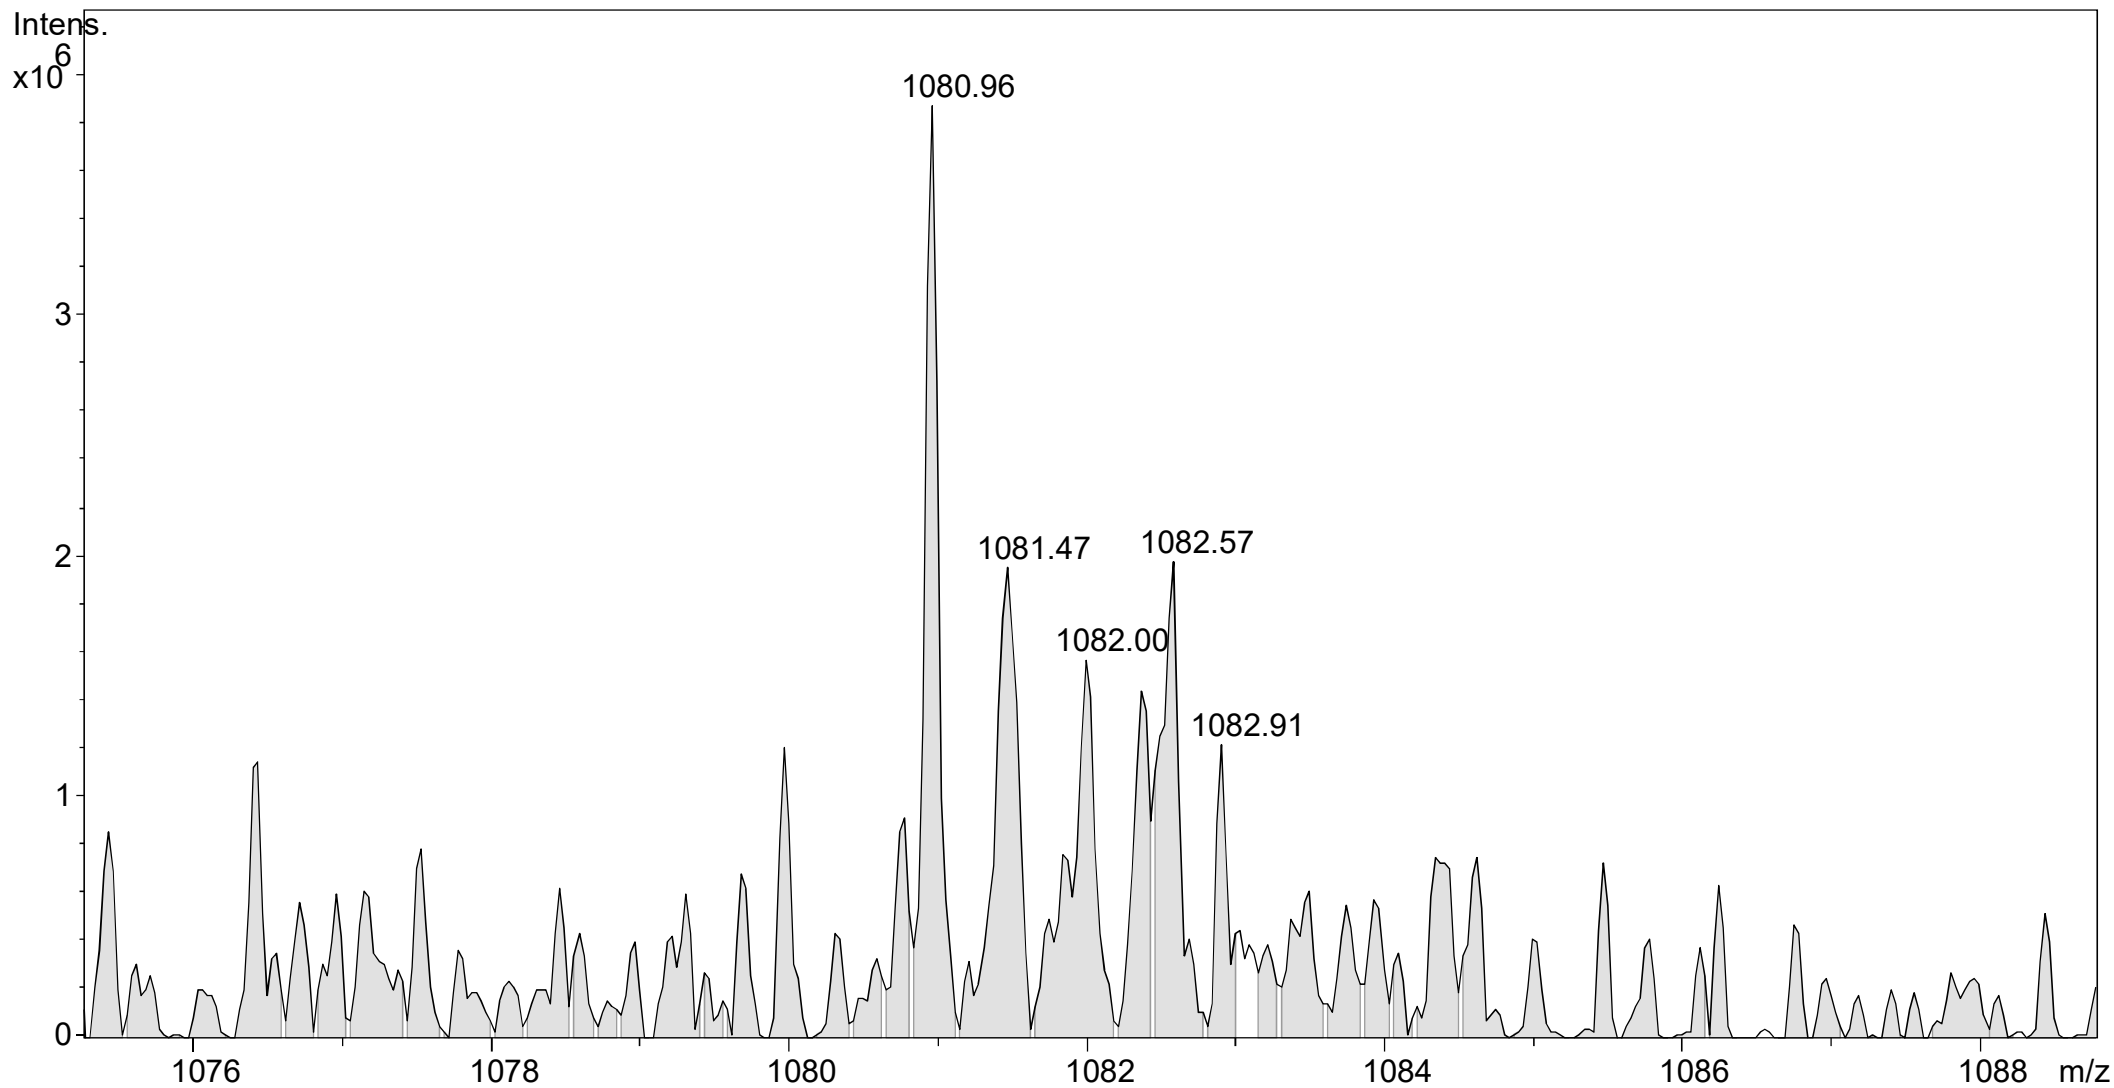

# Glycan 25a

A2S2  
(H5N4S2)

Monoisotopic mass: 2224.80 Da  
Charge observed: 2-  
Theoretical ion:  $m/z$  1111.42  
Observed ion:  $m/z$  1111.50  
Mass deviation:  $m/z$  0.08  
Retention time: 62.1 min

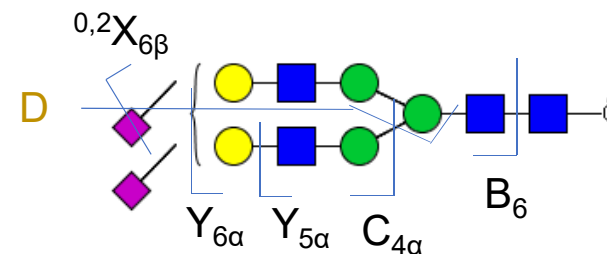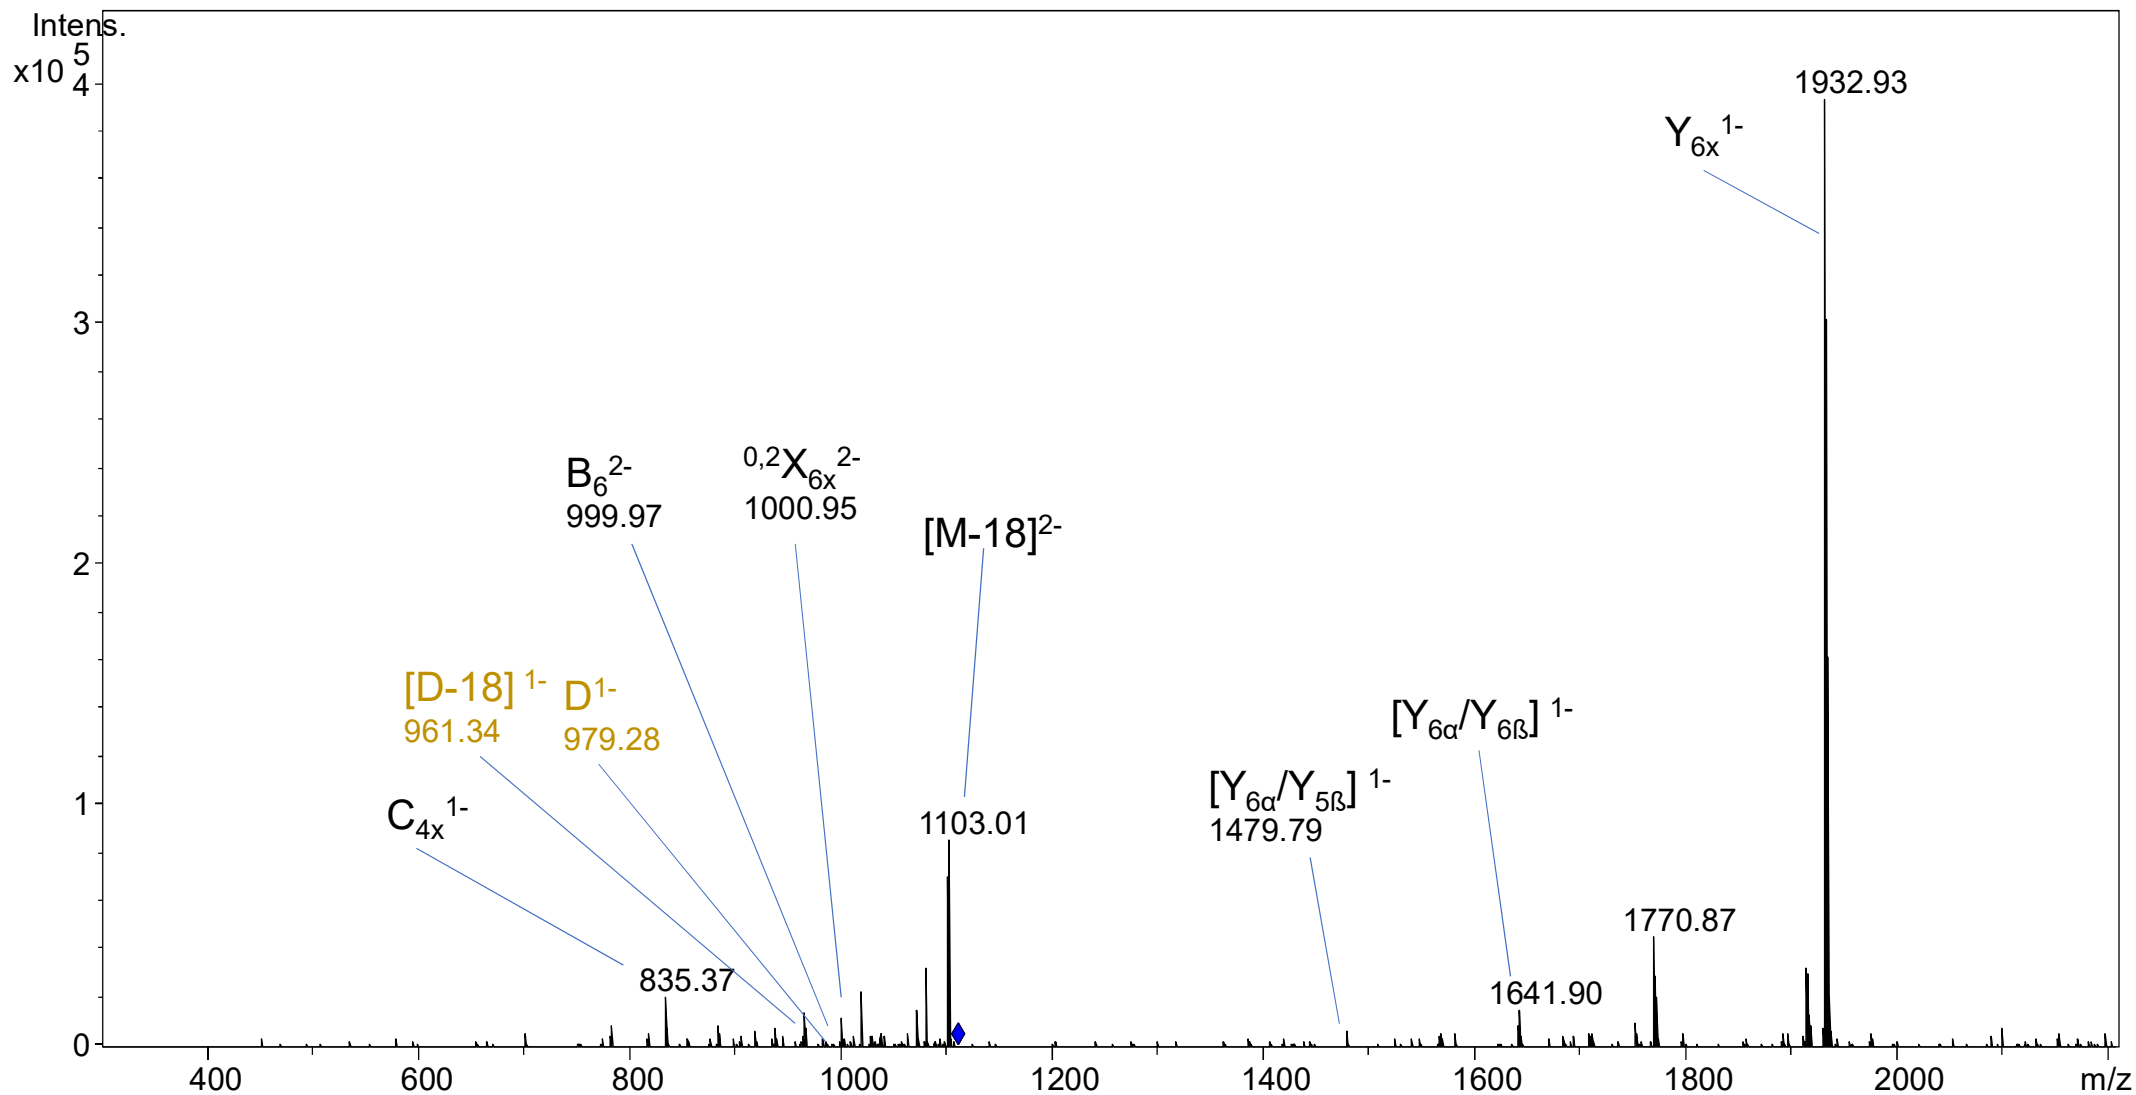

# Glycan 25b

A2S2  
(H5N4S2)

Monoisotopic mass: 2224.80 Da  
Charge observed: 2-  
Theoretical ion:  $m/z$  1111.42  
Observed ion:  $m/z$  1111.54  
Mass deviation:  $m/z$  0.12  
Retention time: 70.0 min

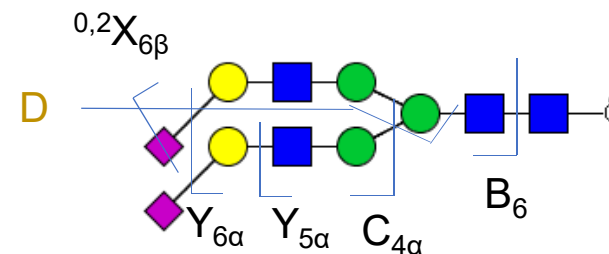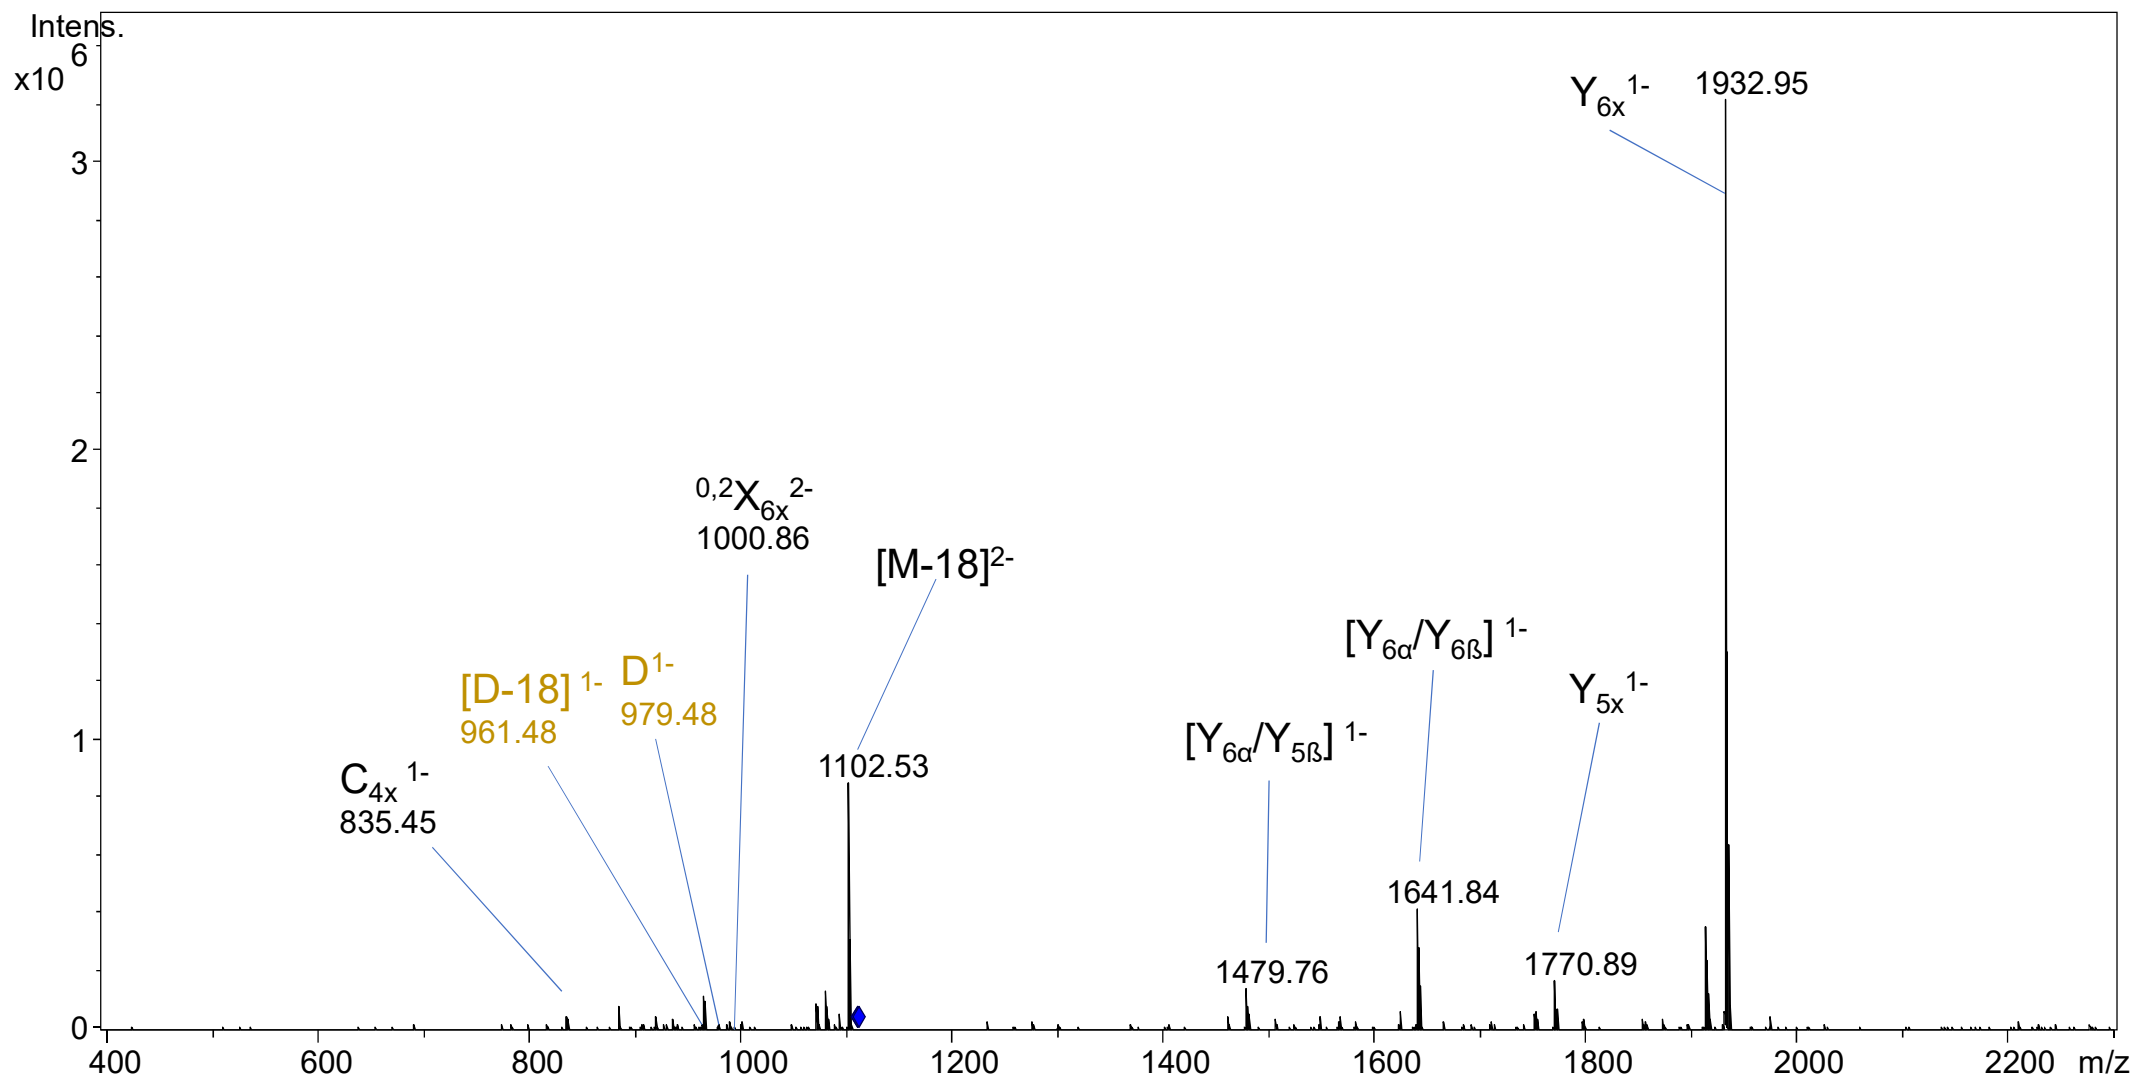

# Glycan 26

A2S1Sg1  
(H5N4S1G1)

Monoisotopic mass: 2240.79 Da  
Charge observed: 2-  
Theoretical ion:  $m/z$  1119.39  
Observed ion:  $m/z$  1111.52  
Mass deviation:  $m/z$  0.13  
Retention time: 69.3 min  
Note: Isomers comprising the Neu5Ac either on the 3- or 6-arm potentially co-elute, which would explain the presence of both D-ions.

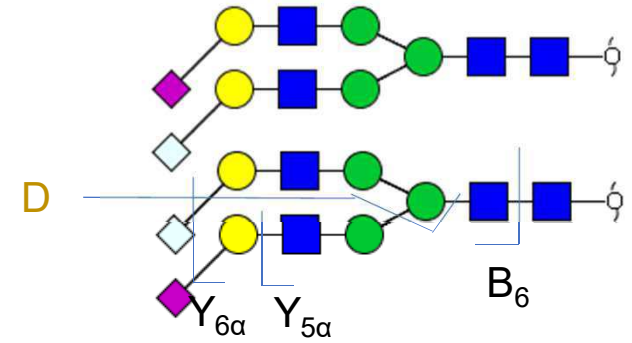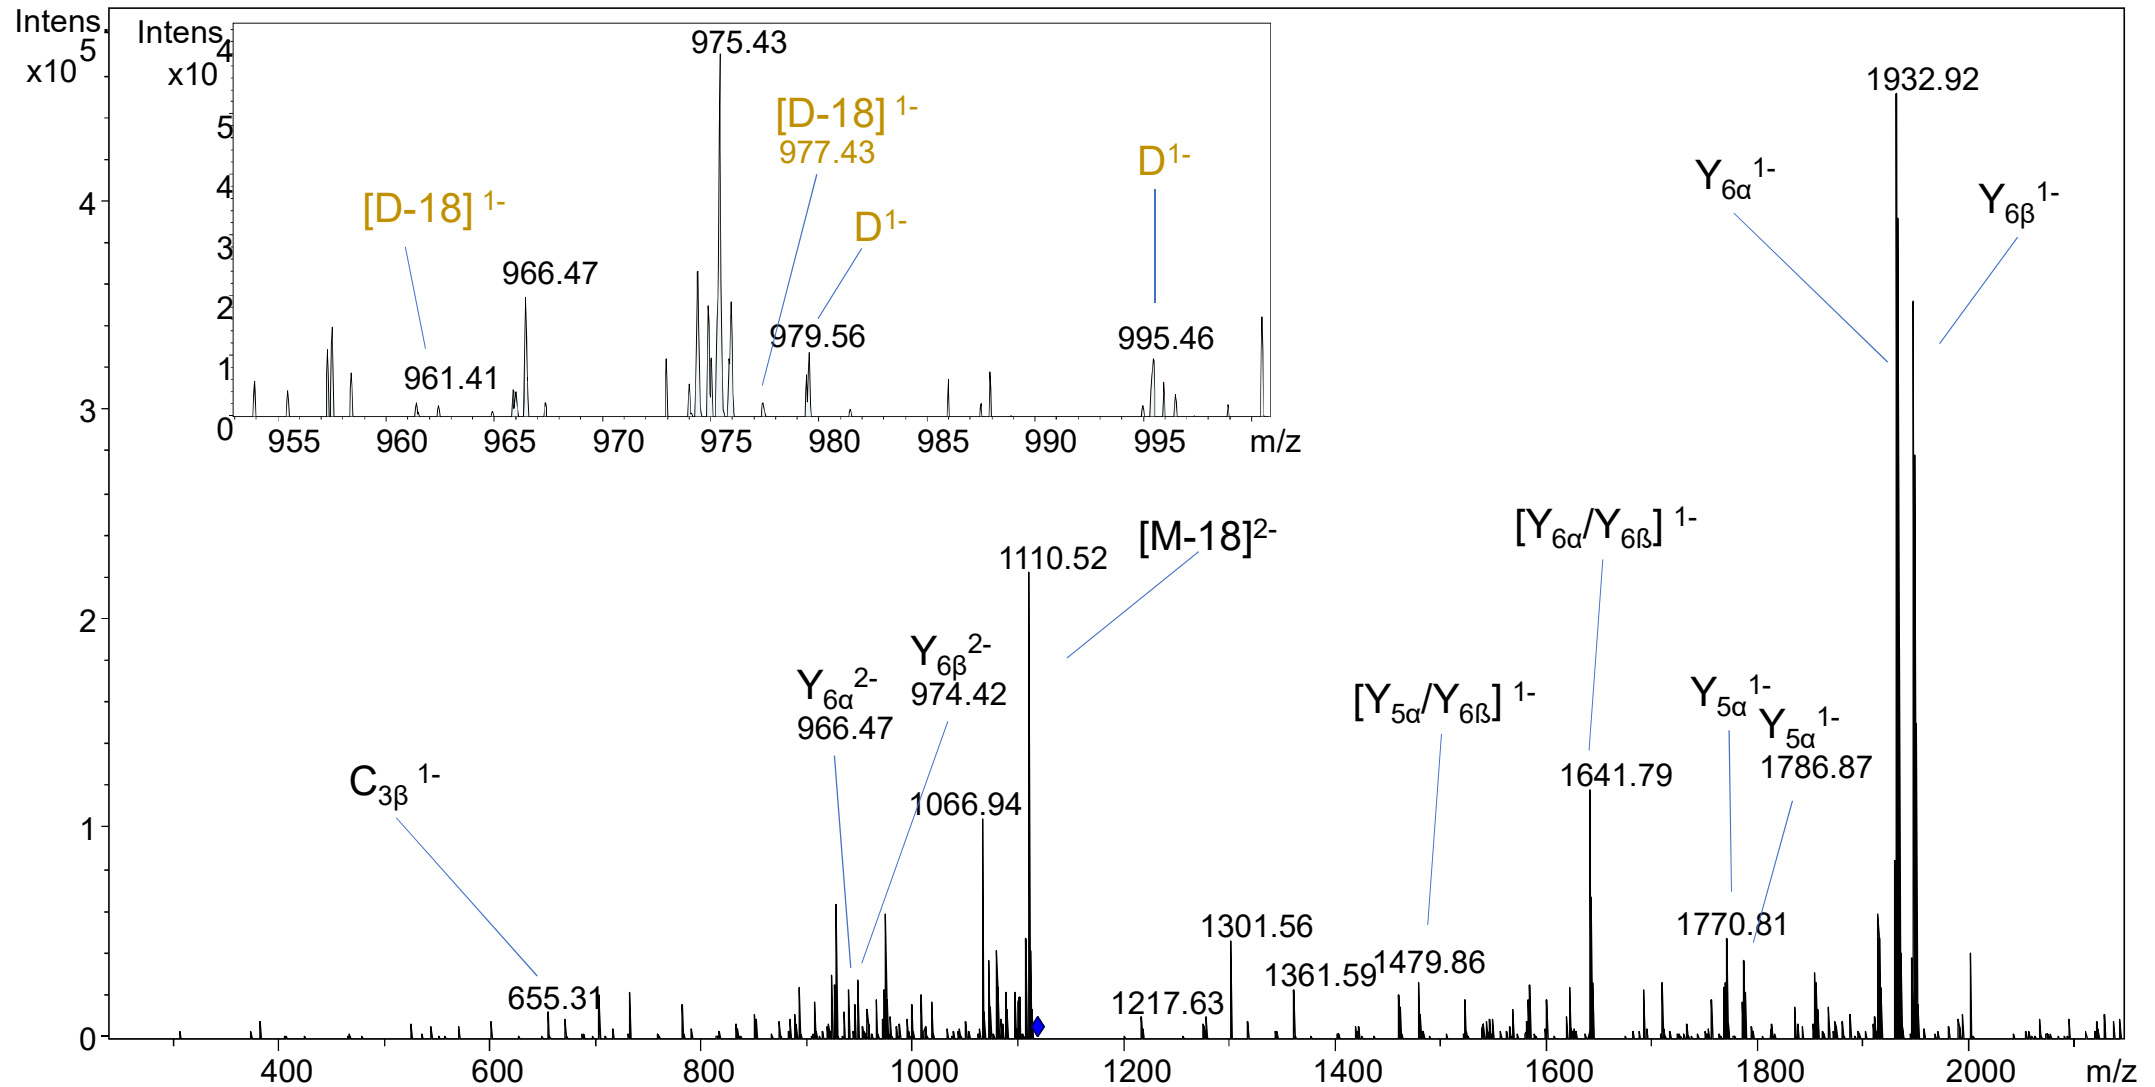



# Glycan 27

A2S2Ac2  
(H5N4S2Ac2)

Monoisotopic mass: 2308.81 Da  
Charge observed: 2-  
Theoretical ion:  $m/z$  1153.40  
Observed ion:  $m/z$  1153.47  
Mass deviation:  $m/z$  0.07  
Retention time: 70.1 min

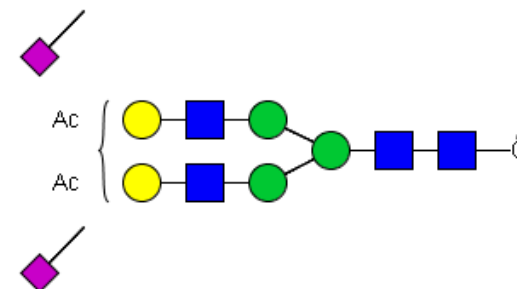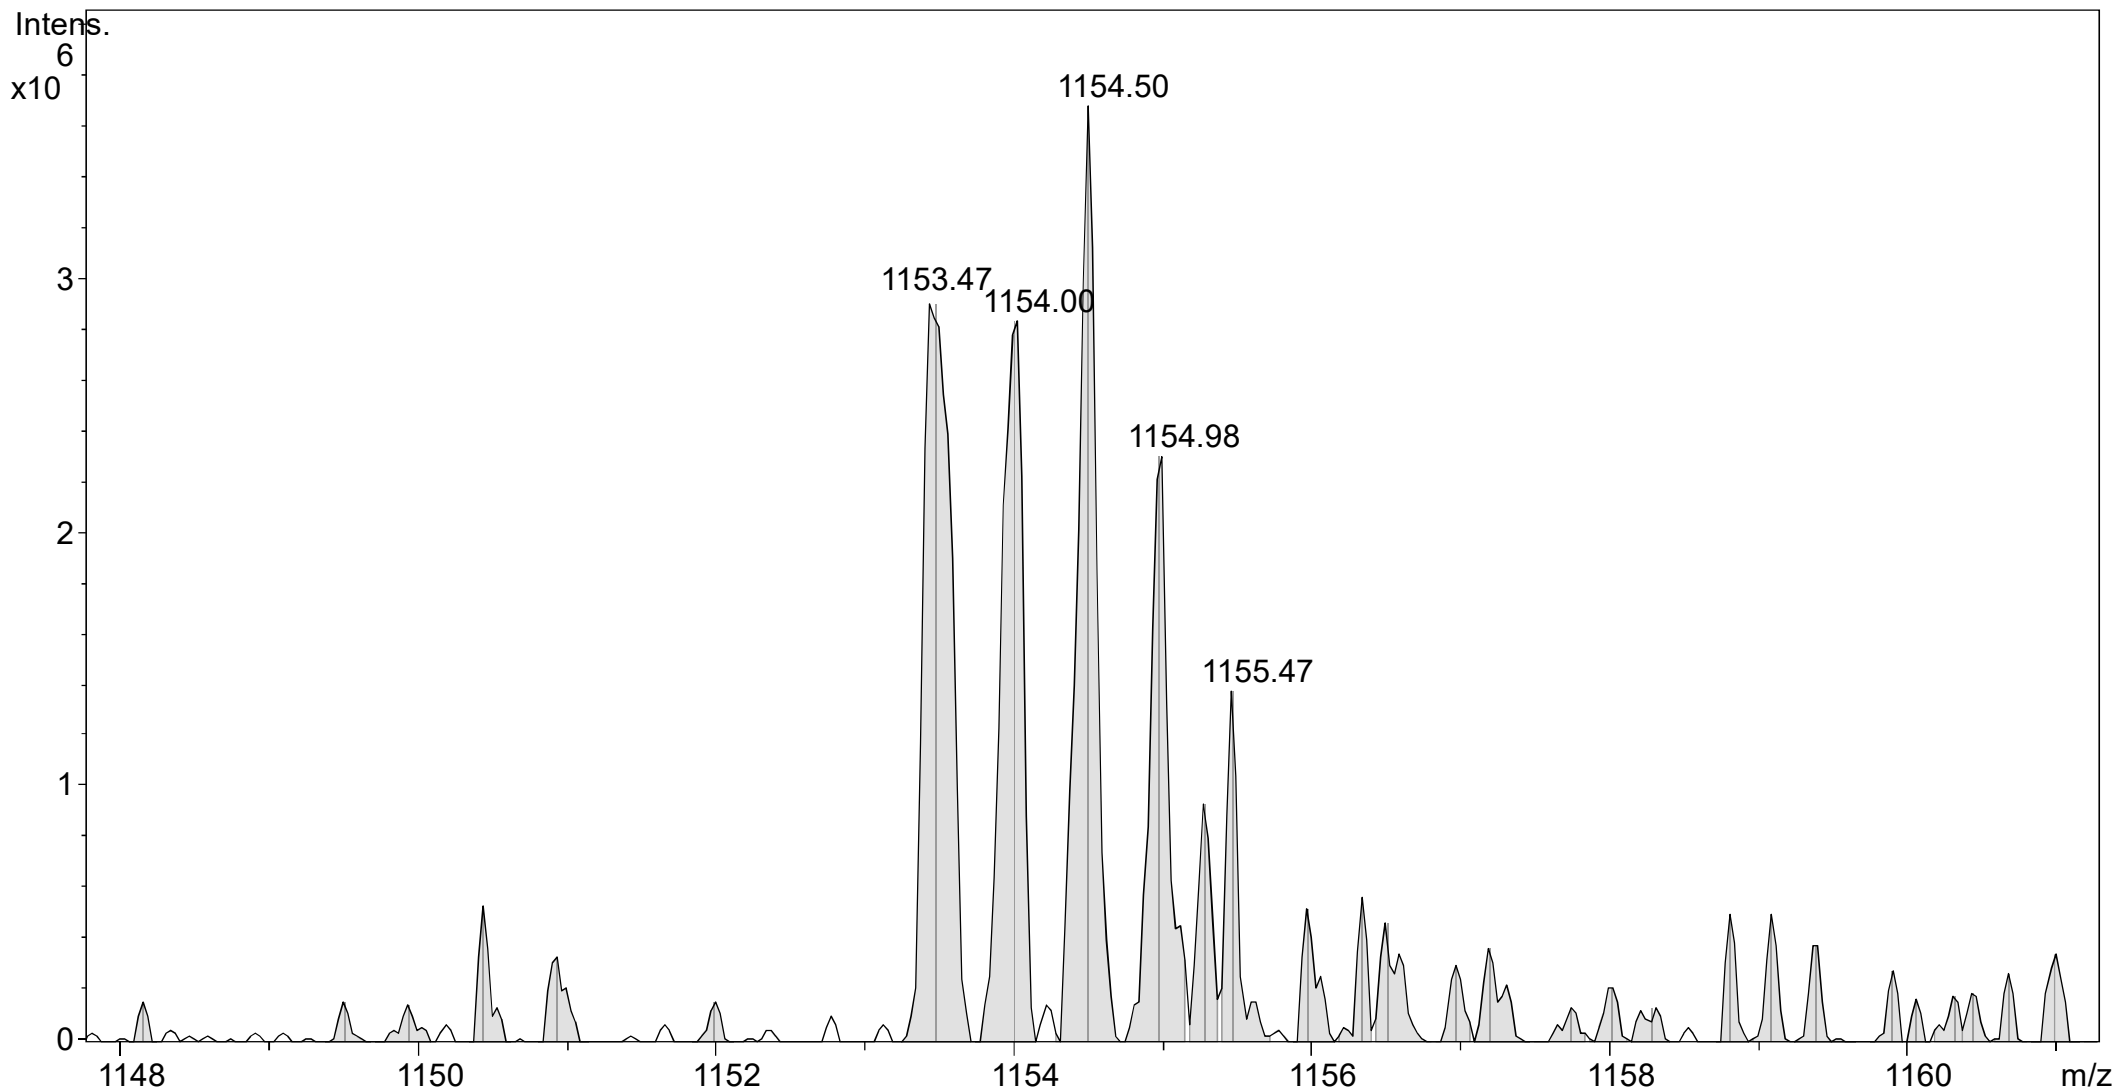



# Glycan 28b

A2S2F  
(H5N4S2F1)

Monoisotopic mass: 2370.86 Da  
Charge observed: 2-  
Theoretical ion:  $m/z$  1184.42  
Observed ion:  $m/z$  1184.60  
Mass deviation:  $m/z$  0.18  
Retention time: 74.9 min

UniCarb-DB: #2563

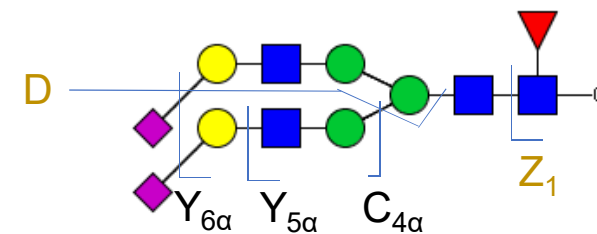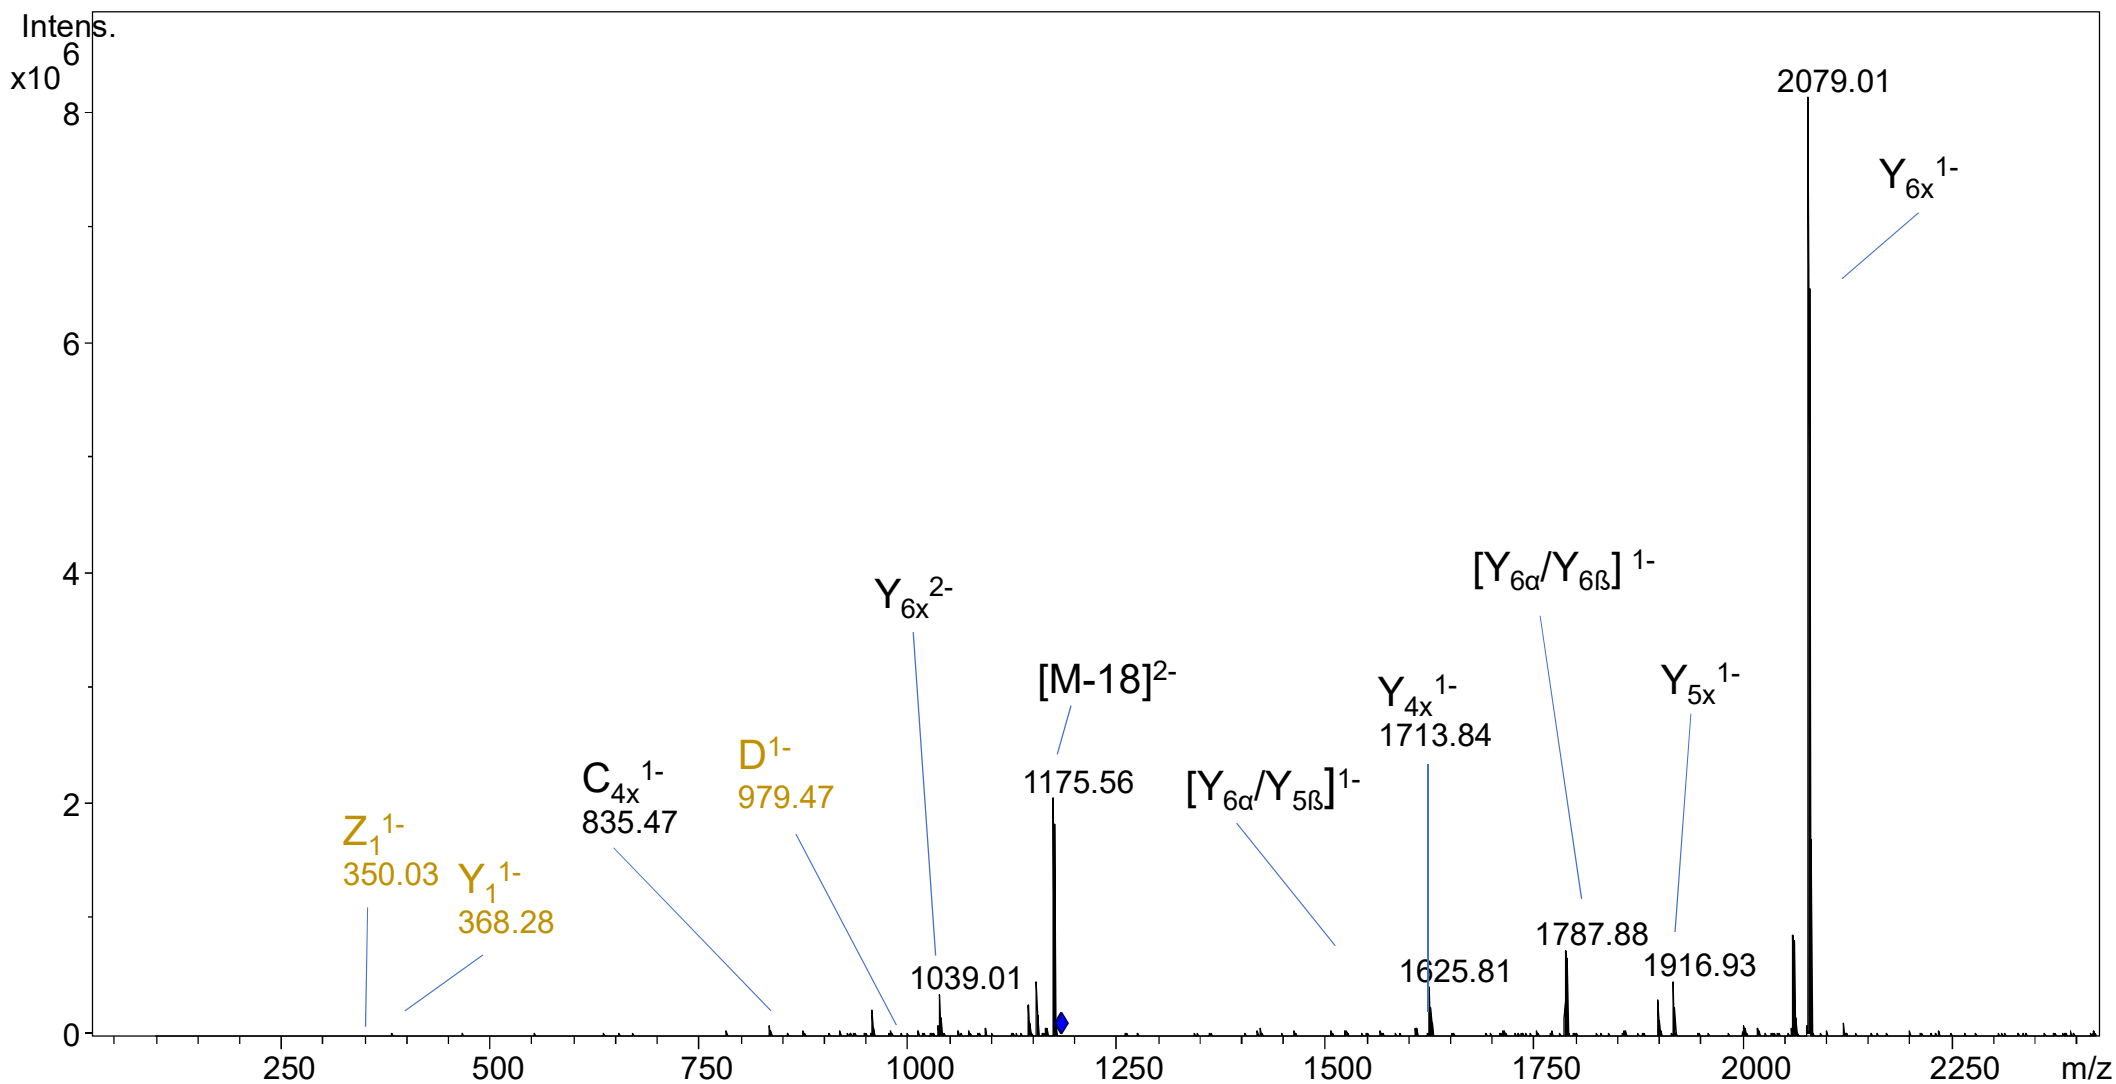

# Glycan 29

A2S1Sg1F  
(H5N4F1S1G1)

Monoisotopic mass: 2385.85 Da  
Charge observed: 2-  
Theoretical ion:  $m/z$  1192.42  
Observed ion:  $m/z$  1192.56  
Mass deviation:  $m/z$  0.14  
Retention time: 74.4 min  
Note: Isomers comprising the Neu5Ac either on the 3- or 6-arm potentially co-elute, which would explain the presence of both D-ions.

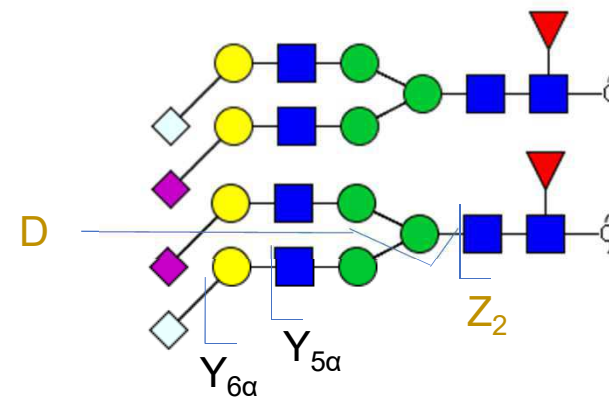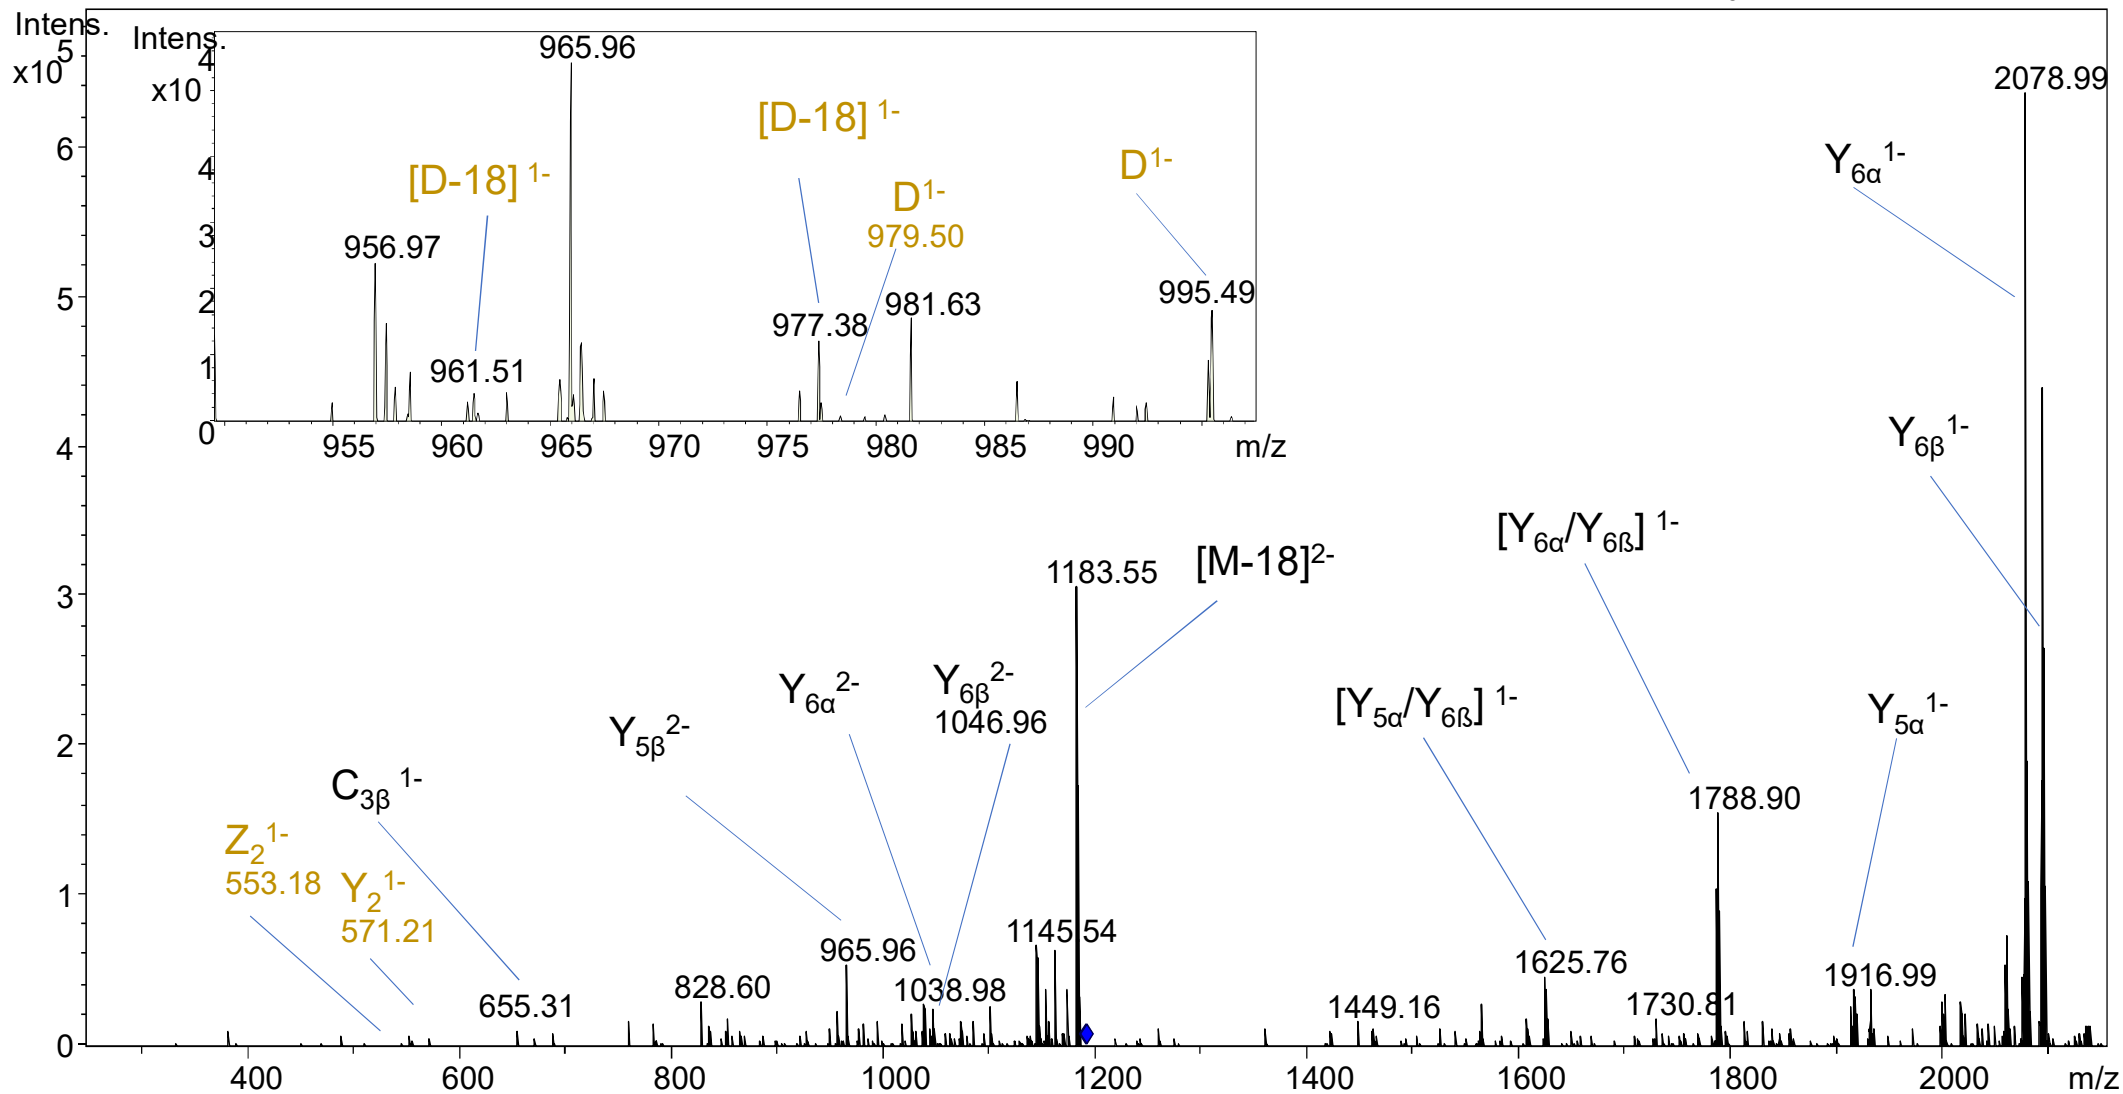

# Glycan 30

A2S2Ac2F  
(H5N4F1S2Ac2)

Monoisotopic mass: 2454.87 Da  
Charge observed: 2-  
Theoretical ion:  $m/z$  1226.43  
Observed ion:  $m/z$  1226.51  
Mass deviation:  $m/z$  0.08  
Retention time: 75.5 min

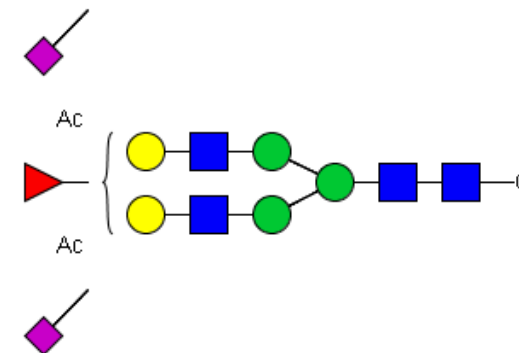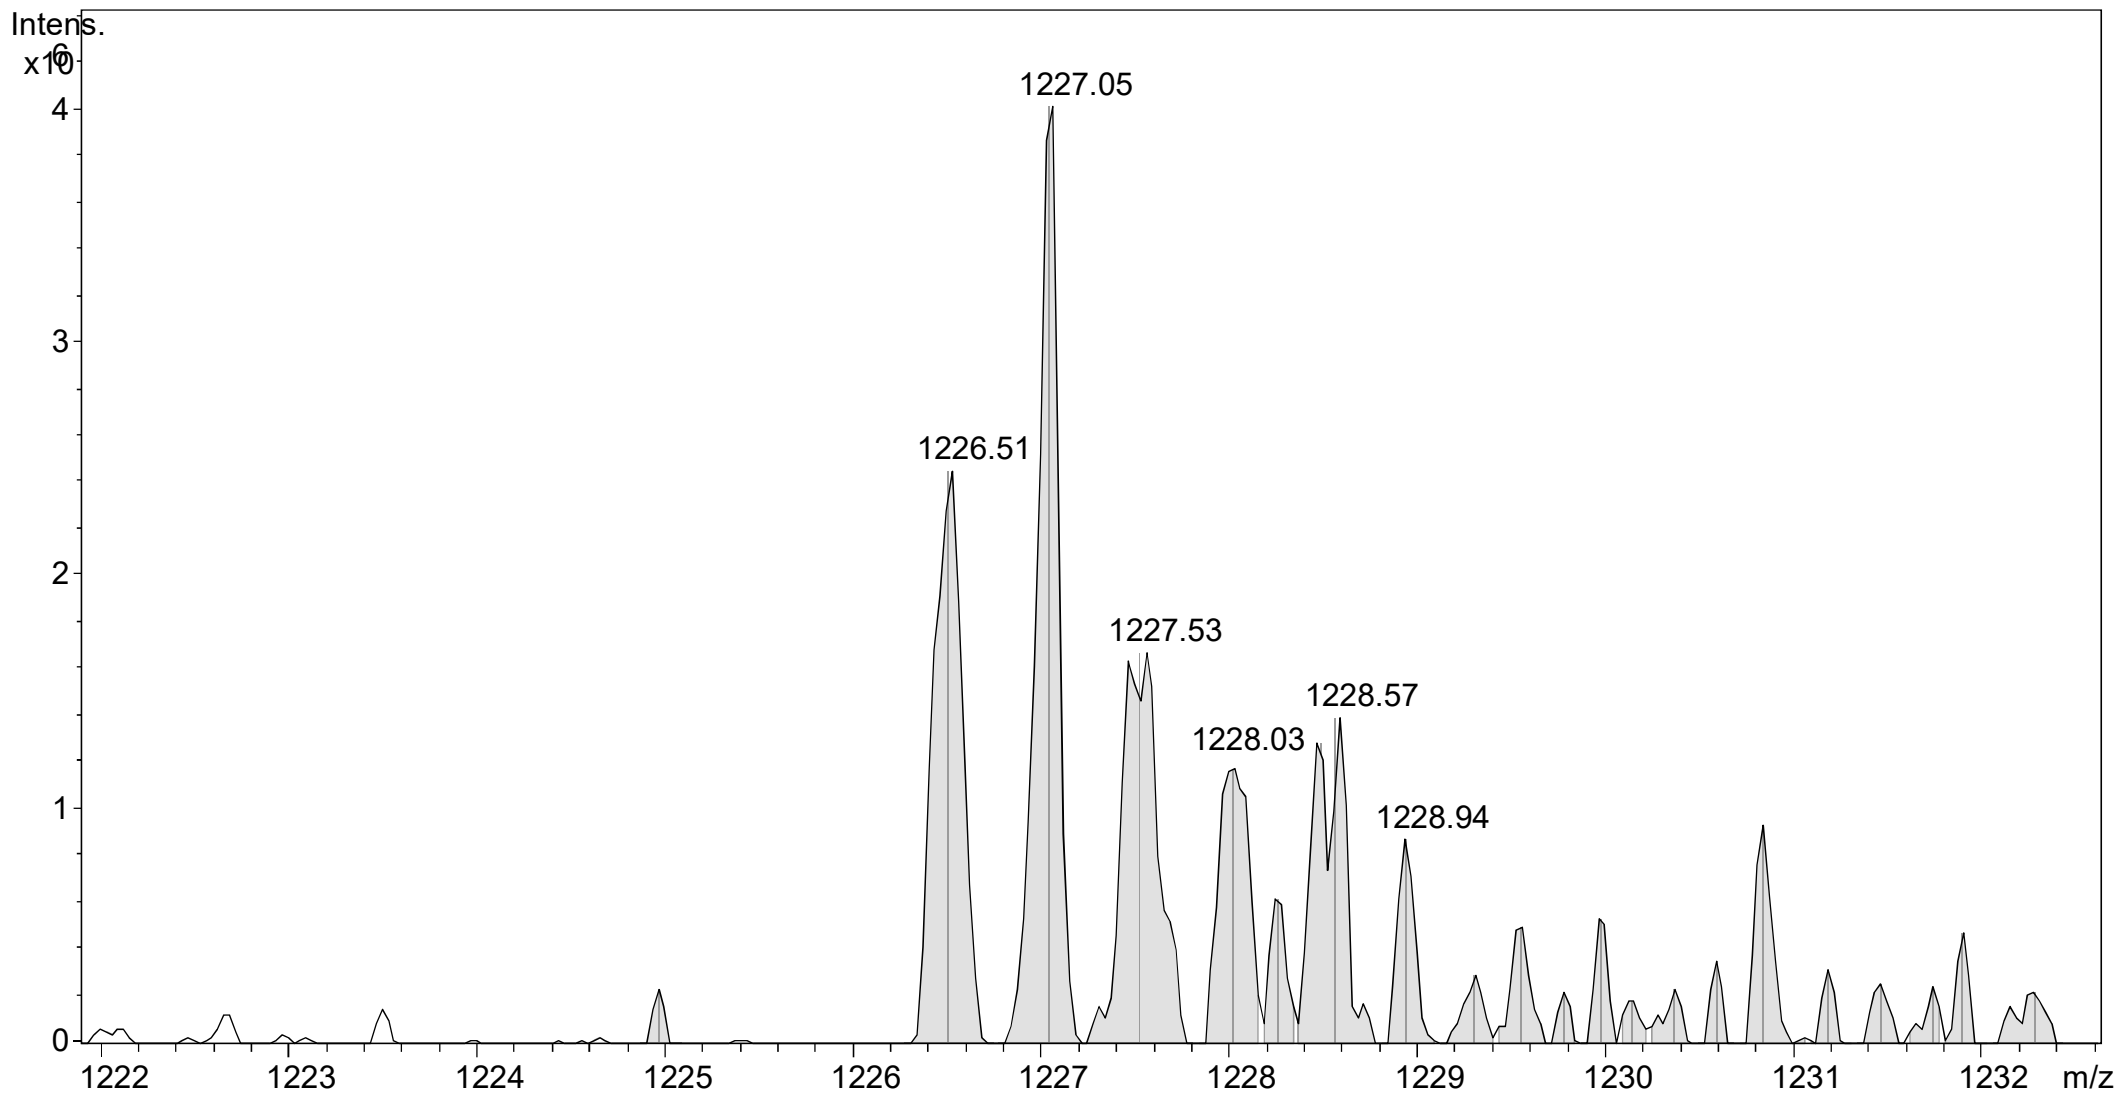

# Glycan 31

A3G0S2F  
(H5N5F1S2)

Monoisotopic mass: 2573.94 Da  
Charge observed: 2-  
Theoretical ion:  $m/z$  1285.96  
Observed ion:  $m/z$  1286.04  
Mass deviation:  $m/z$  0.09  
Retention time: 73.5 min  
Note: No MS2 was recorded.

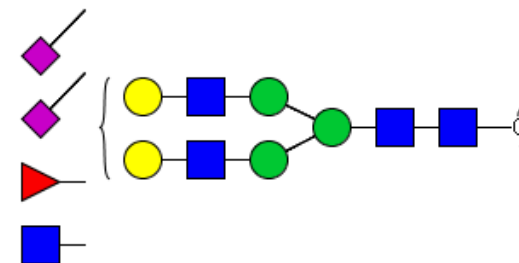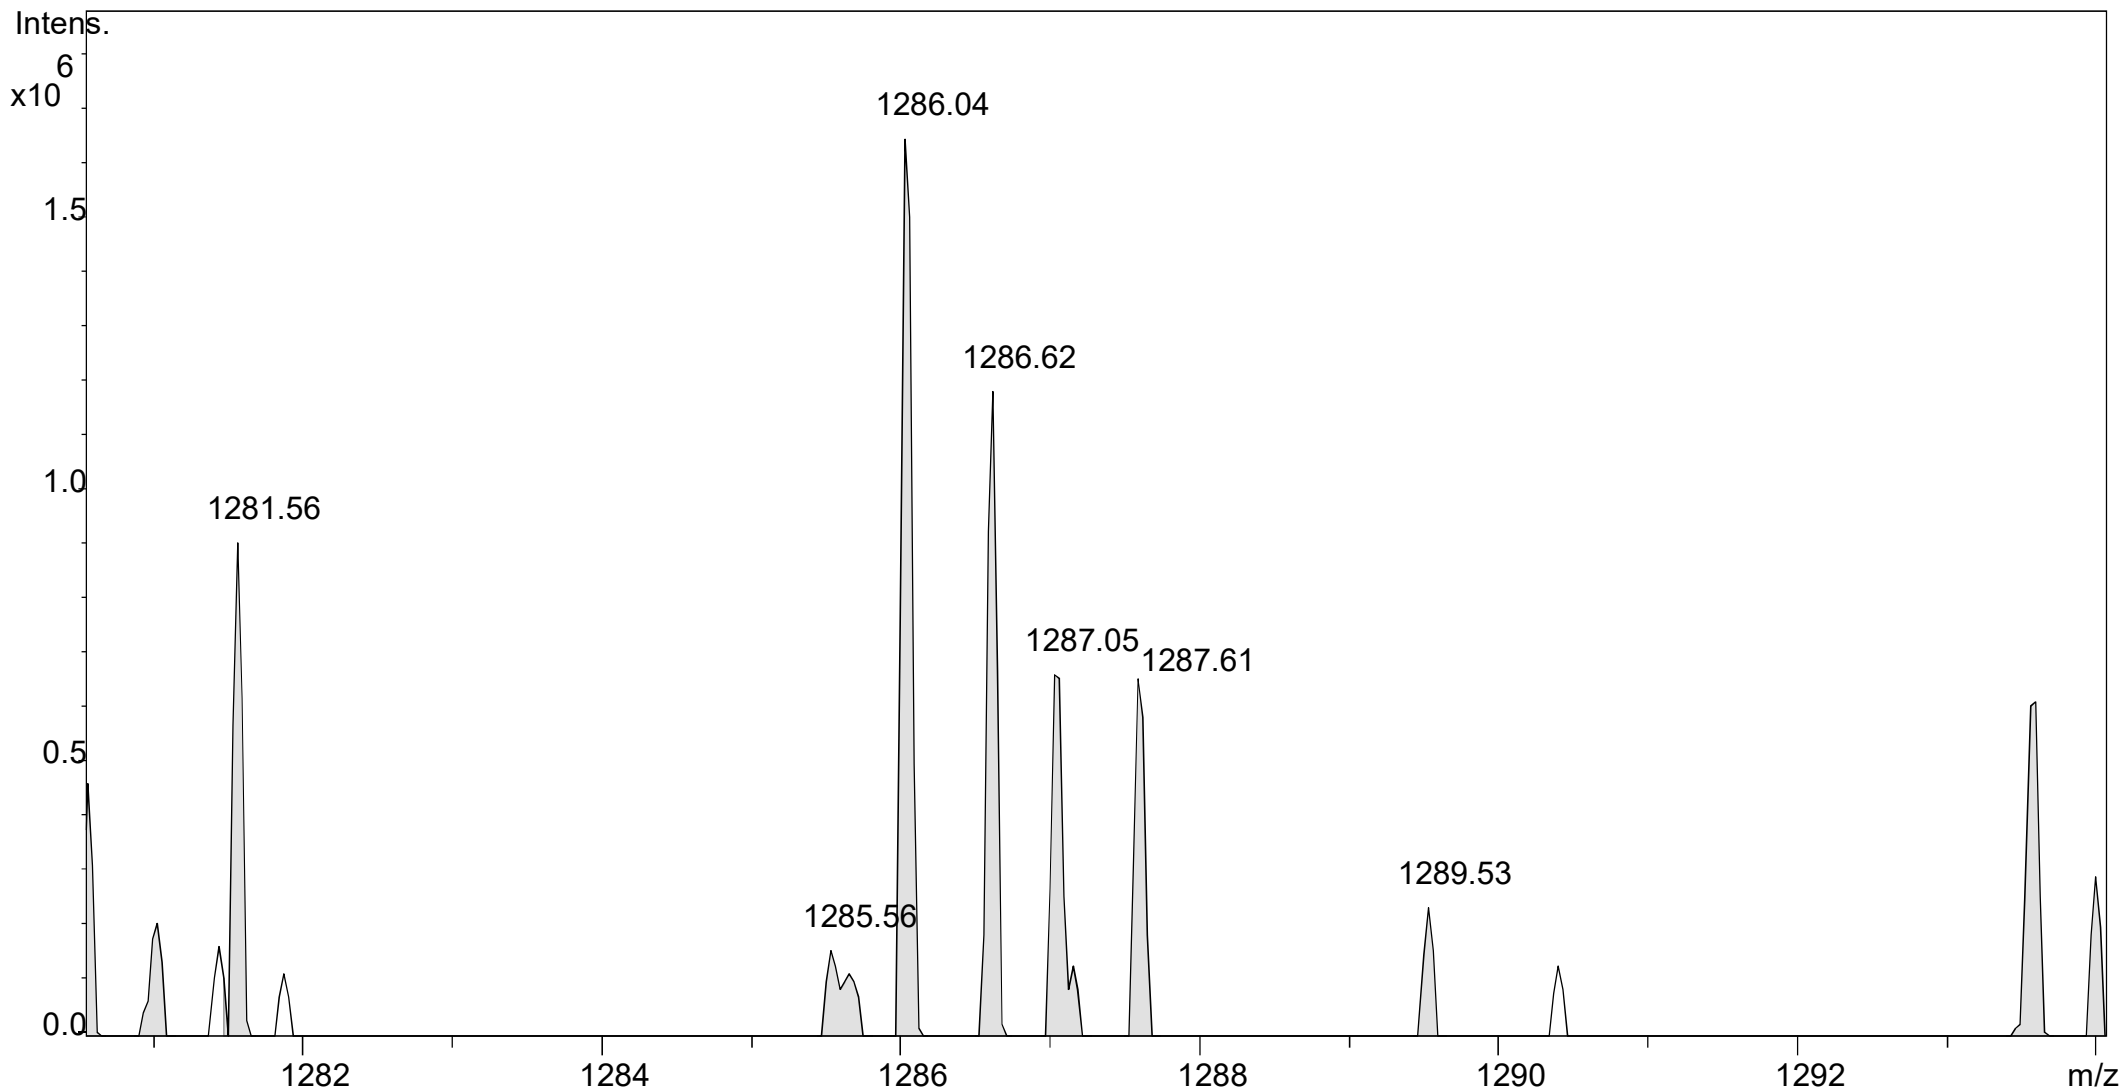

# Glycan 32

A3G1S2F  
(H6N5F1S2)

Monoisotopic mass: 2735.98 Da  
Charge observed: 2-  
Theoretical ion:  $m/z$  1366.99  
Observed ion:  $m/z$  1367.14  
Mass deviation:  $m/z$  0.15  
Retention time: 71.8 min

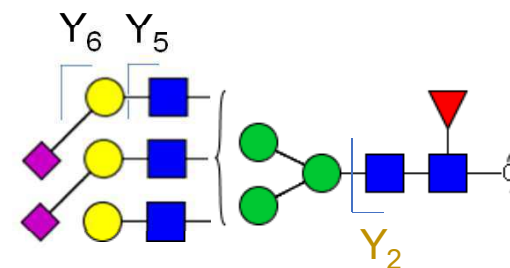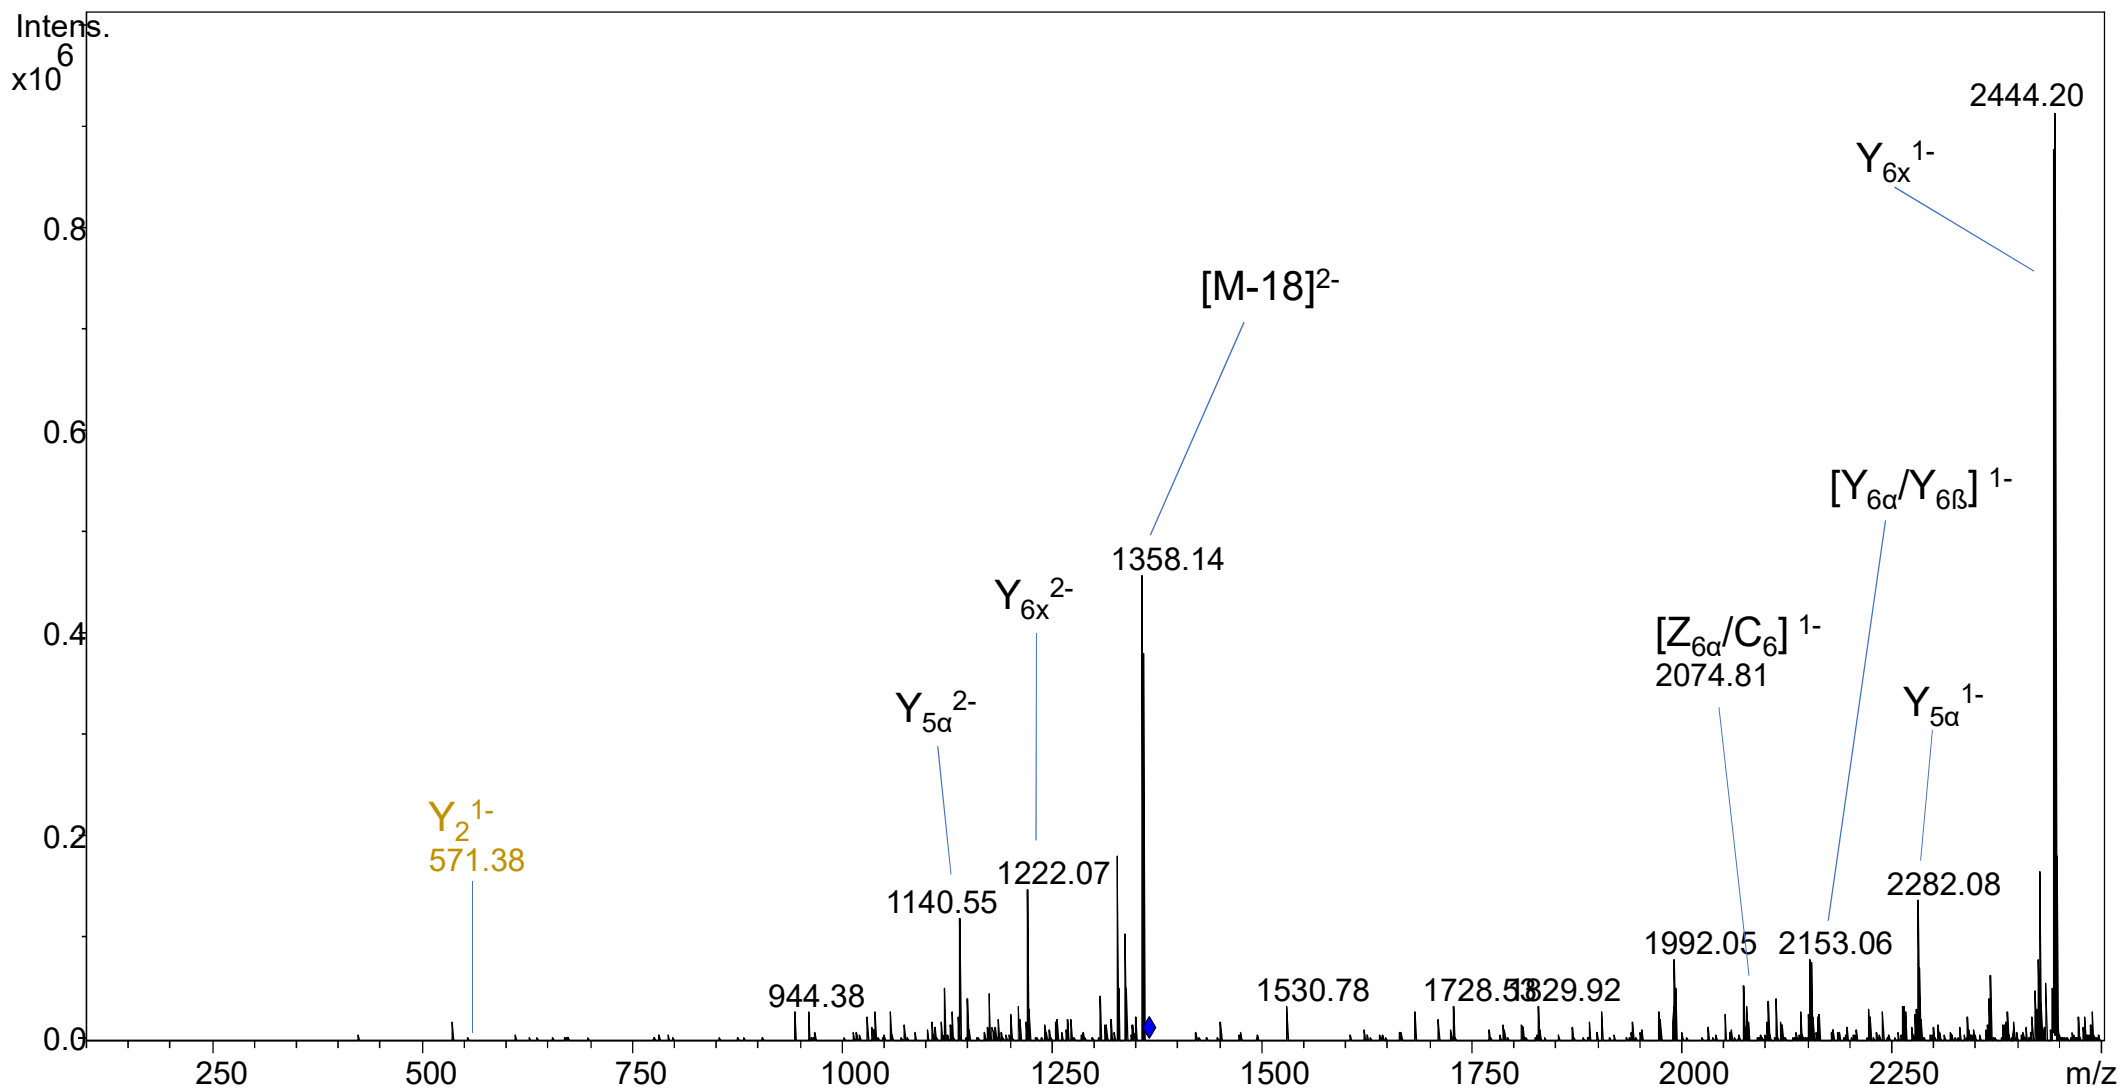

# Glycan 33

A3S3  
(H6N5S3)

Monoisotopic mass: 2881.03 Da  
Charge observed: 2-  
Theoretical ion:  $m/z$  1439.51  
Observed ion:  $m/z$  1439.68  
Mass deviation:  $m/z$  0.17  
Retention time: 73.8 min

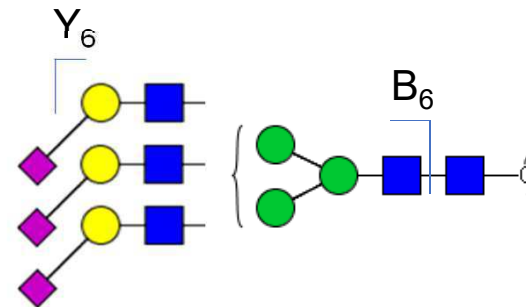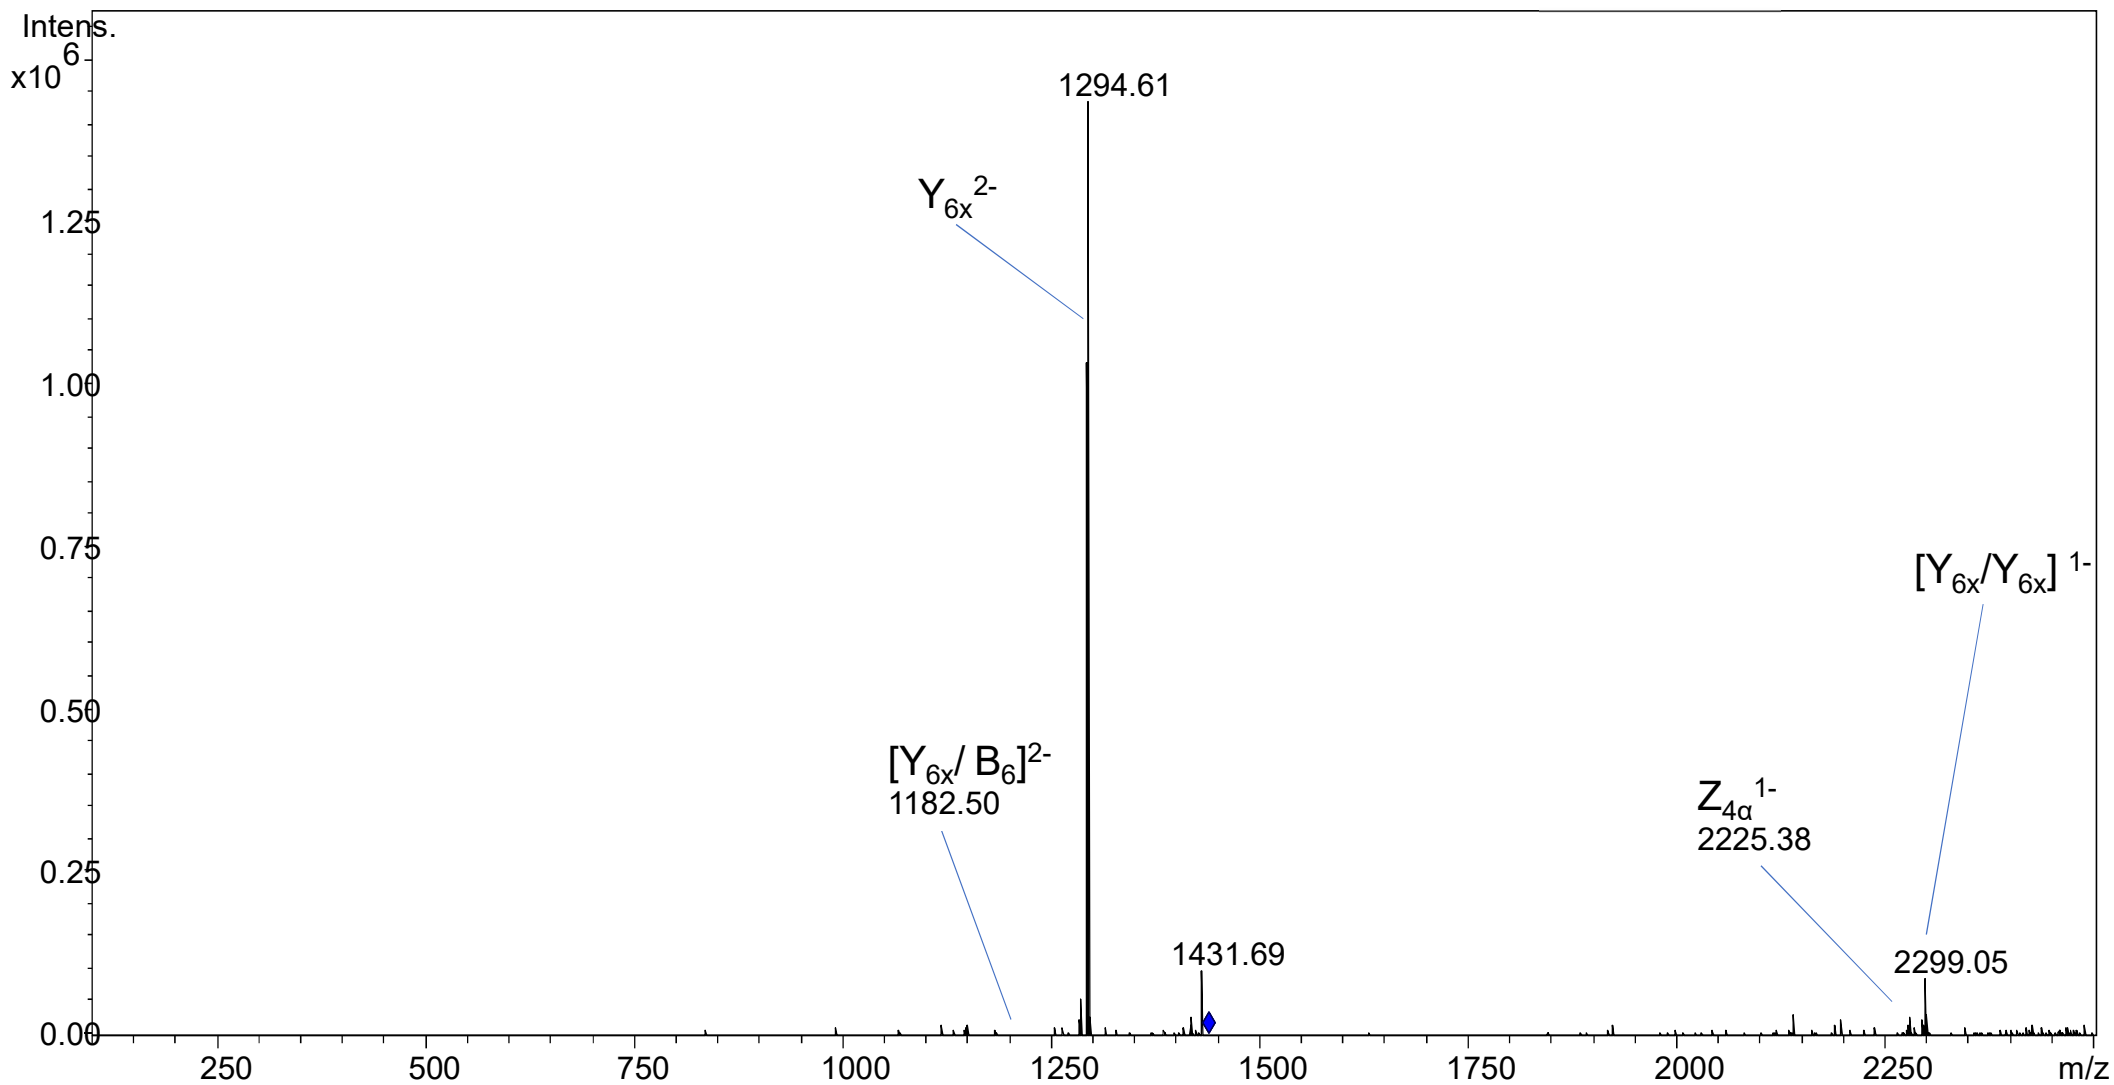



# Glycan 34a

A3S3F  
(H6N5F1S3)

Monoisotopic mass: 3027.08 Da  
Charge observed: 2-  
Theoretical ion:  $m/z$  1512.54  
Observed ion:  $m/z$  1512.69  
Mass deviation:  $m/z$  0.15  
Retention time: 76.6 min

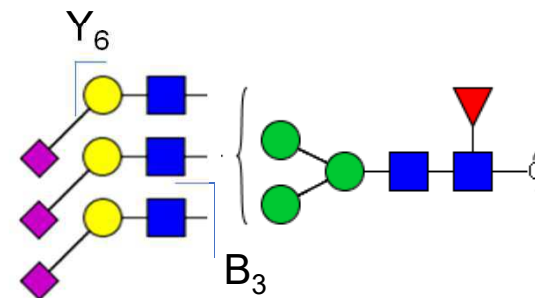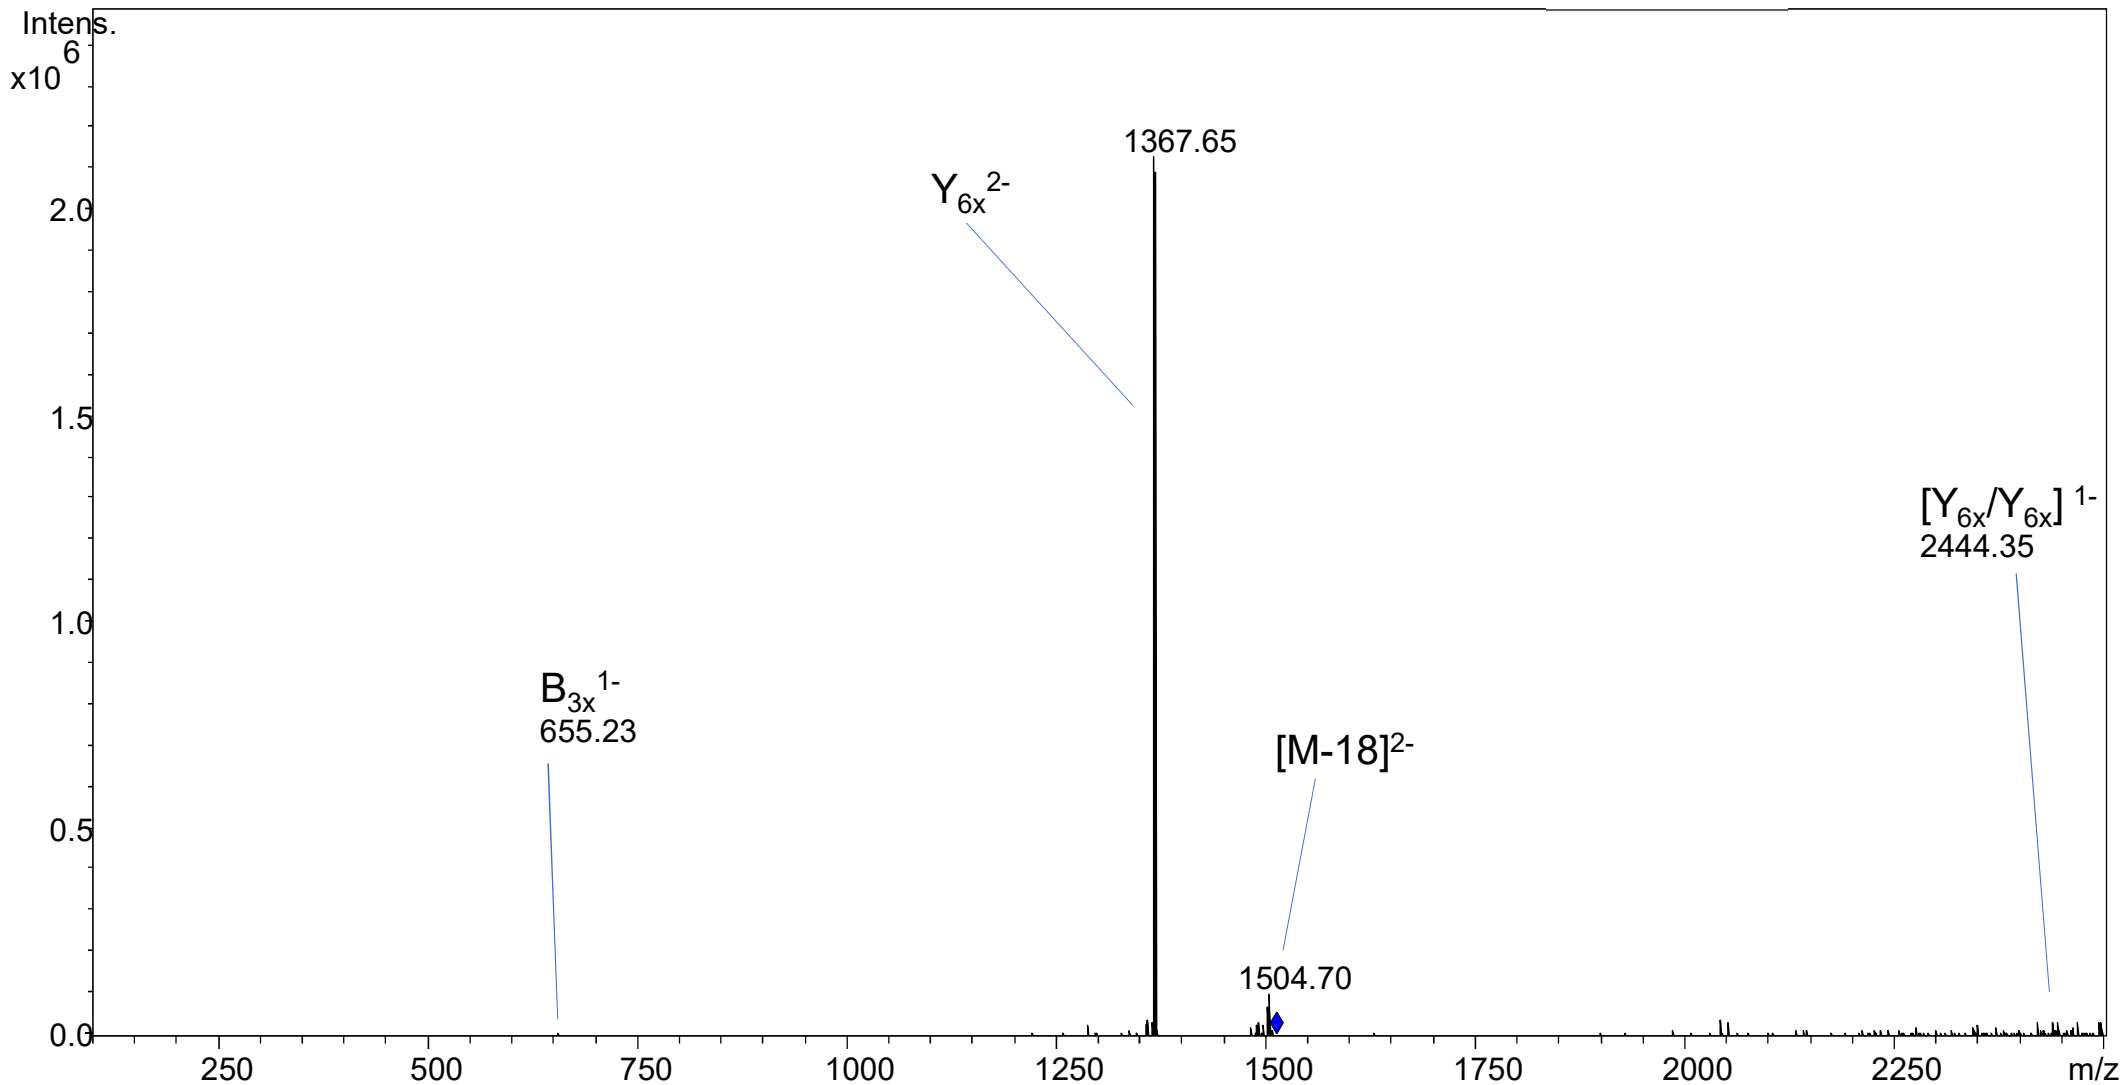

# Glycan 34b

A3S3F  
(H6N5F1S3)

Monoisotopic mass: 3027.08 Da  
Charge observed: 2-  
Theoretical ion:  $m/z$  1512.54  
Observed ion:  $m/z$  1512.68  
Mass deviation:  $m/z$  0.14  
Retention time: 78.4 min

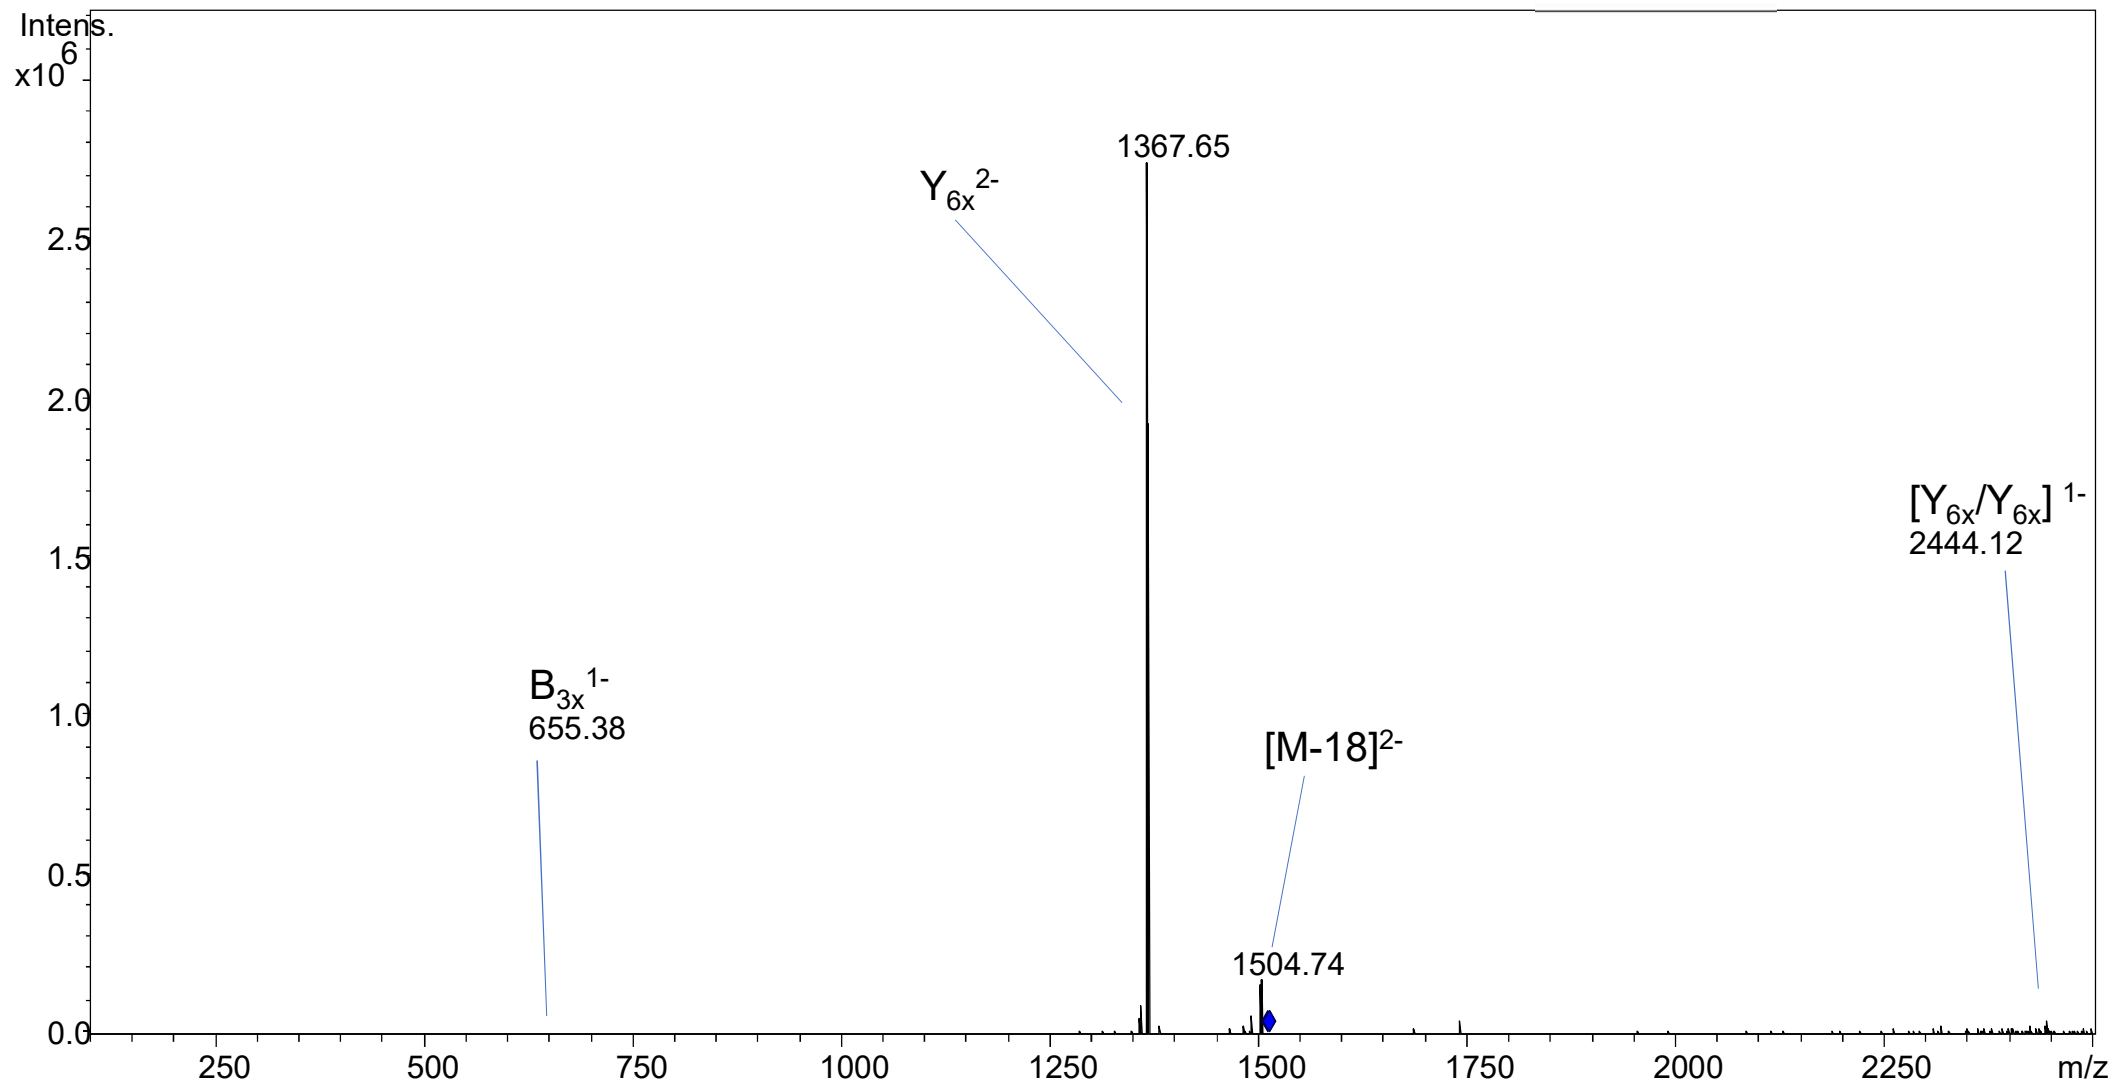

# Glycan 35

A4S4F  
(H7N6F1S4)

Monoisotopic mass: 3683.31 Da  
Charge observed: 3-  
Theoretical ion:  $m/z$  1226.76  
Observed ion:  $m/z$  1226.87  
Mass deviation:  $m/z$  0.11  
Retention time: 67.8 min

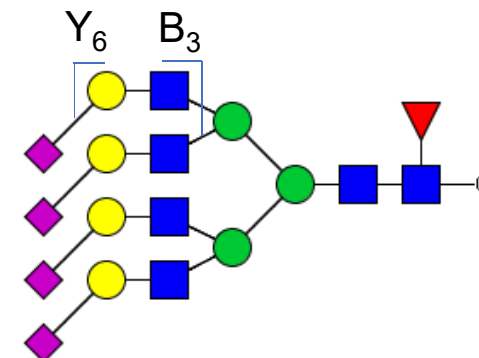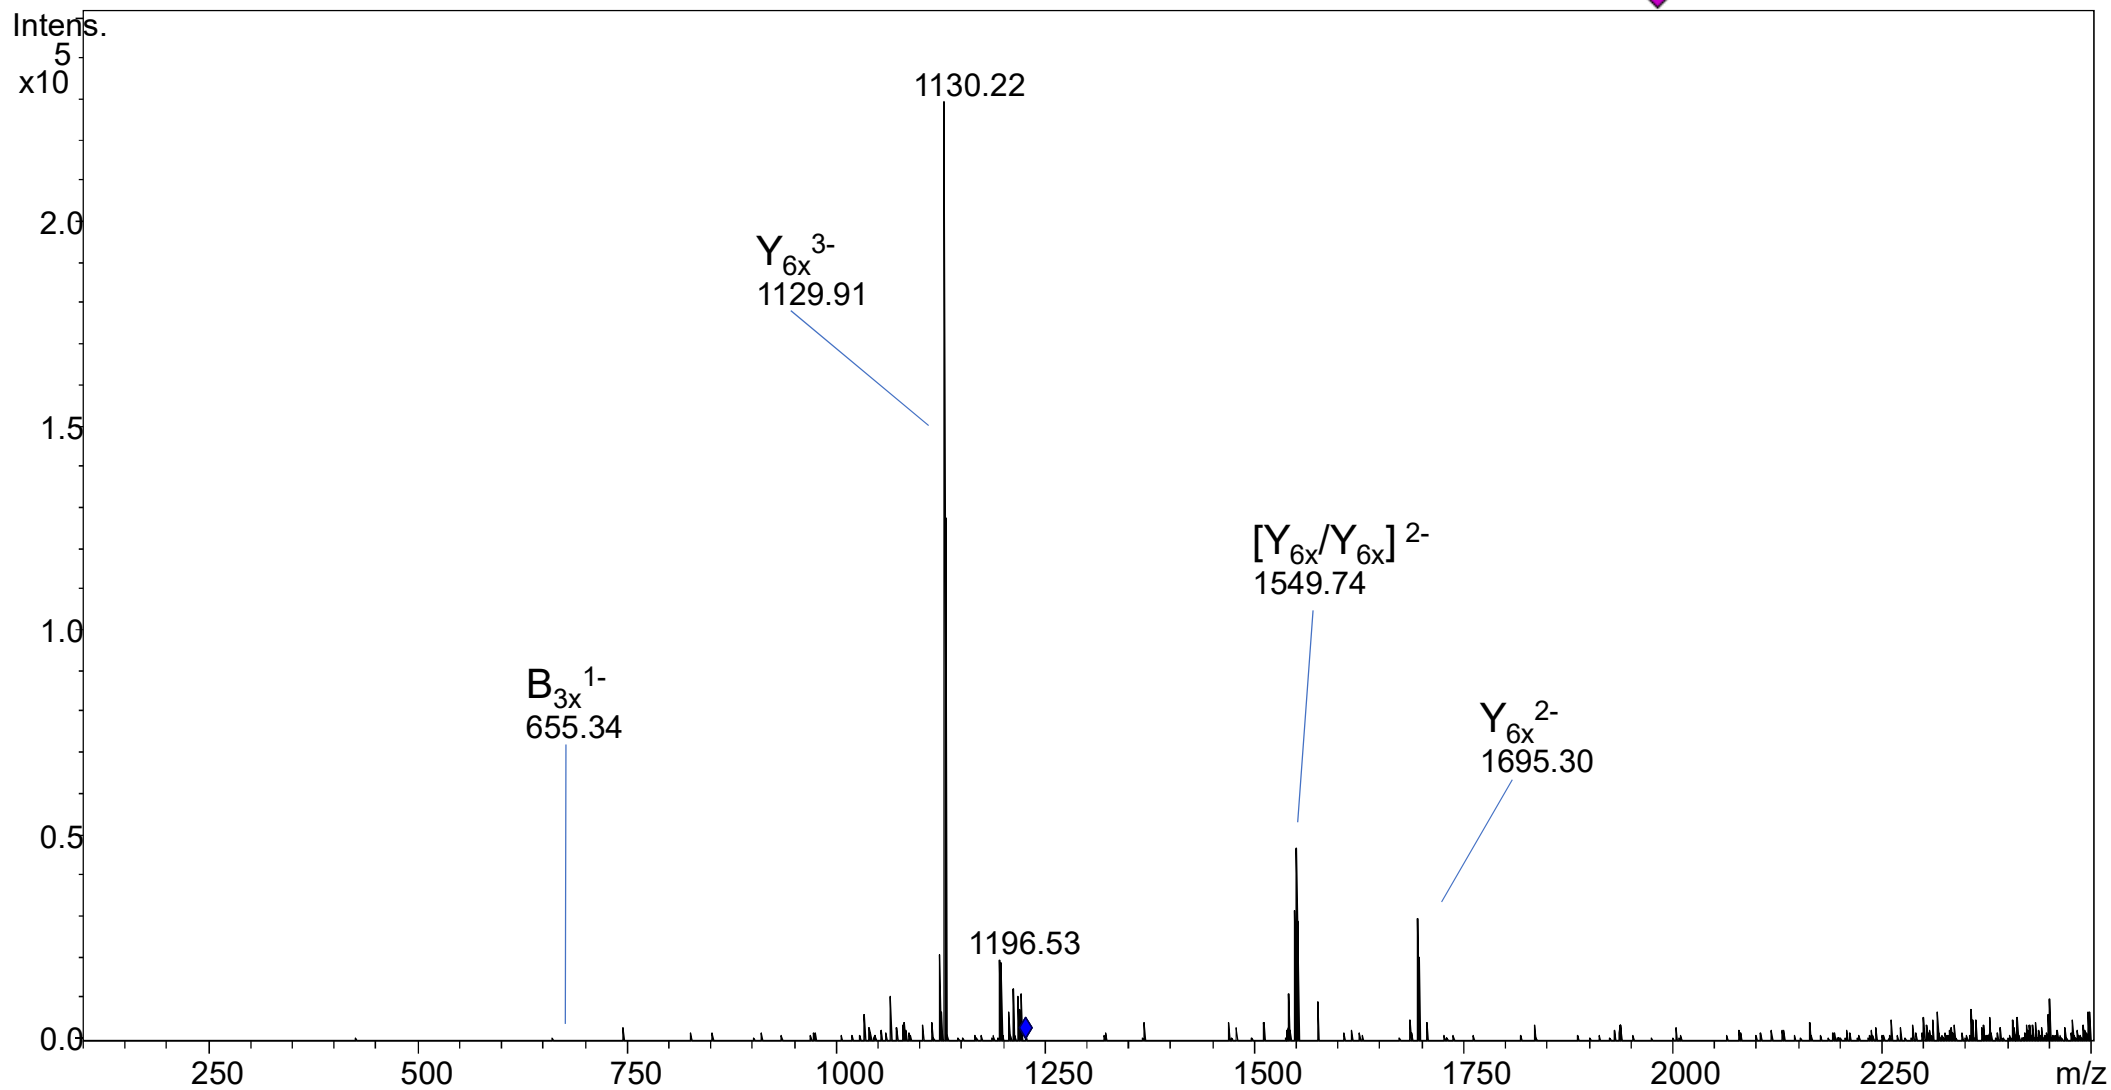

# Glycan 36

A1G0  
(H3N3)

Monoisotopic mass: 1115.42 Da  
Charge observed: 1-  
Theoretical ion:  $m/z$  1114.42  
Observed ion:  $m/z$  1114.55  
Mass deviation:  $m/z$  0.13  
Retention time: 59.4 min

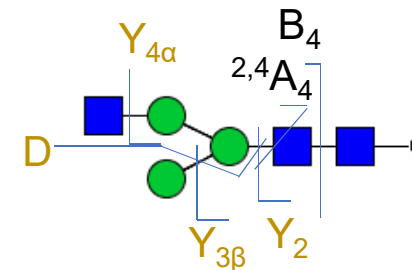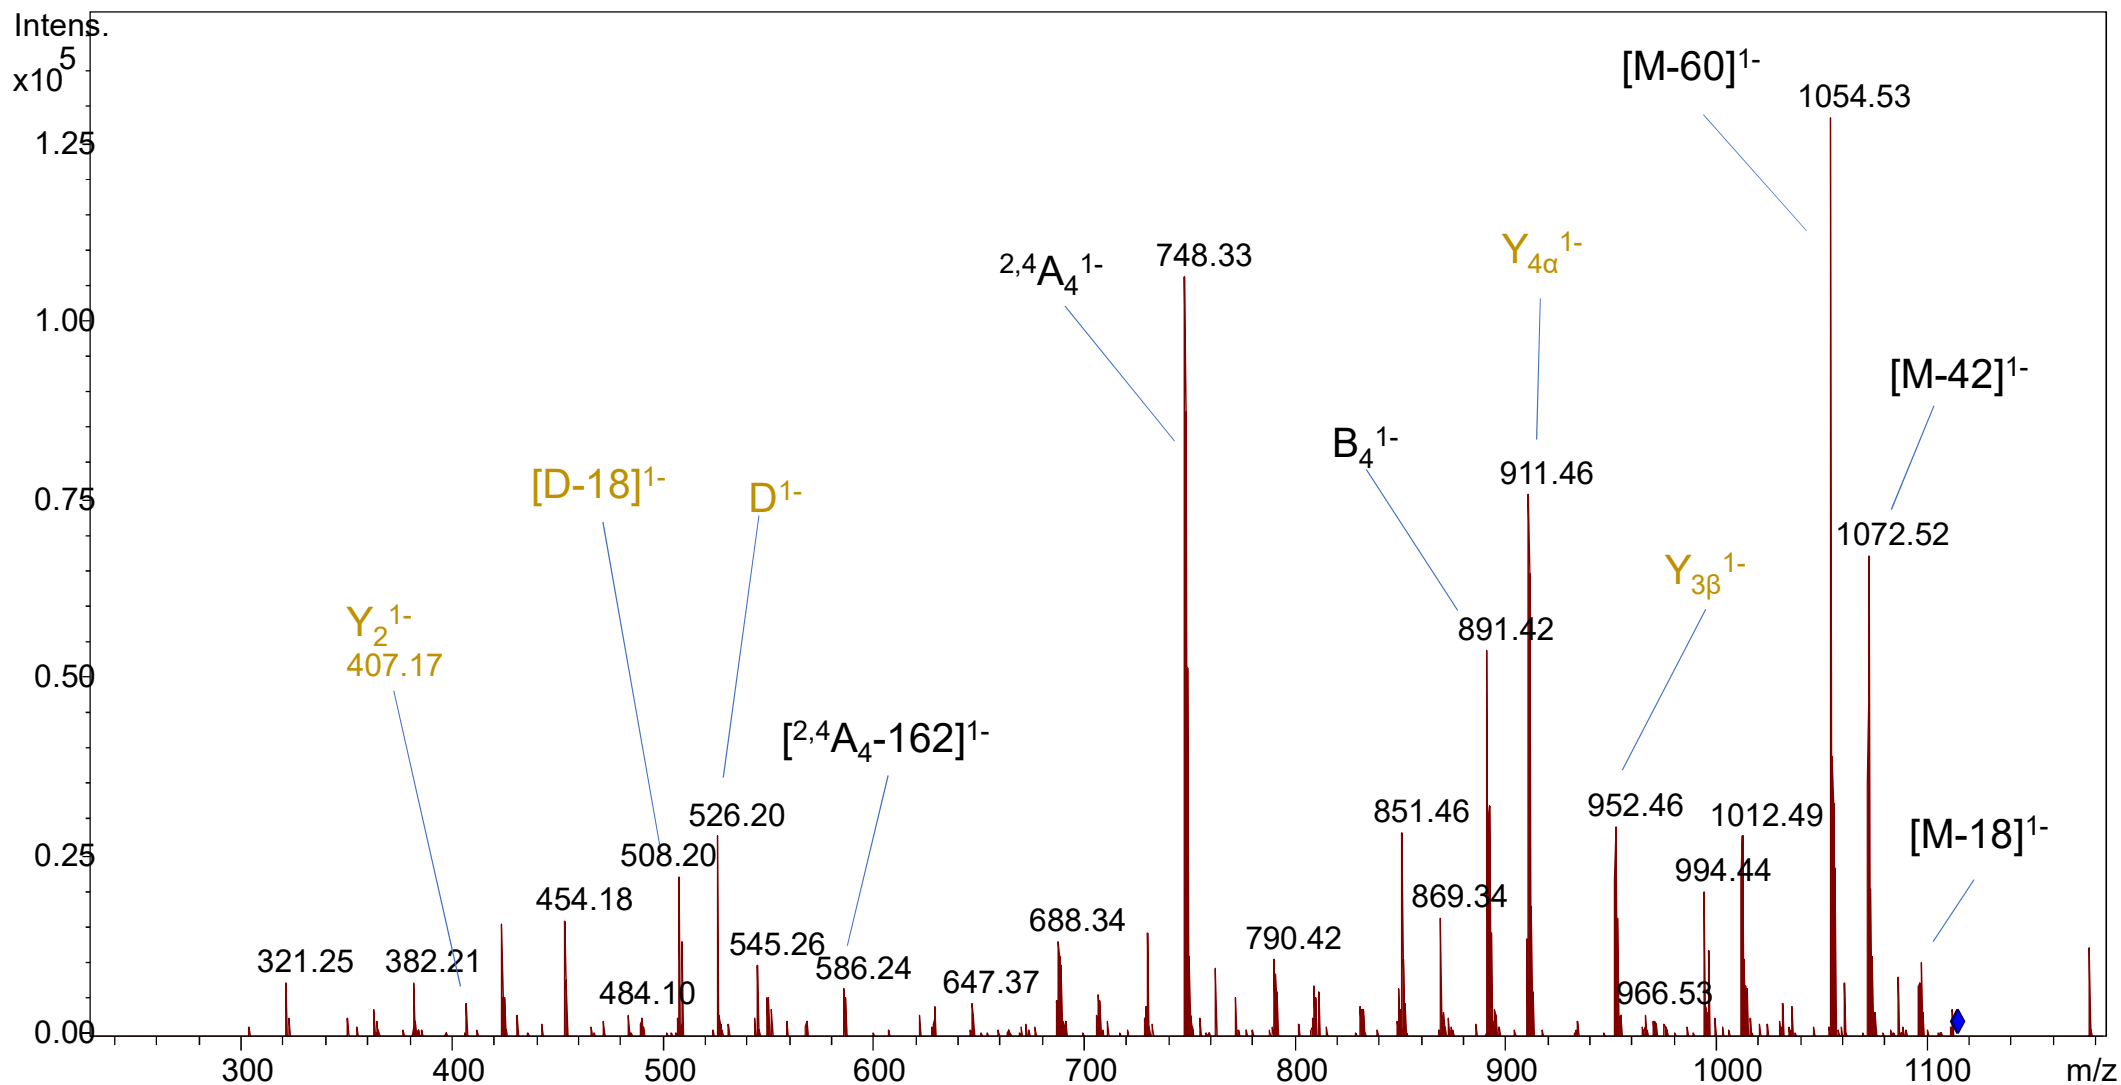

# Glycan 37

A1G0F  
(H3N3F1)

Monoisotopic mass: 1261.48 Da  
Charge observed: 1-  
Theoretical ion:  $m/z$  1260.47  
Observed ion:  $m/z$  1260.66  
Mass deviation:  $m/z$  0.09  
Retention time: 69.1 min  
Note: No MS2 was recorded.

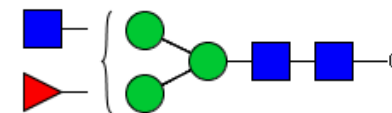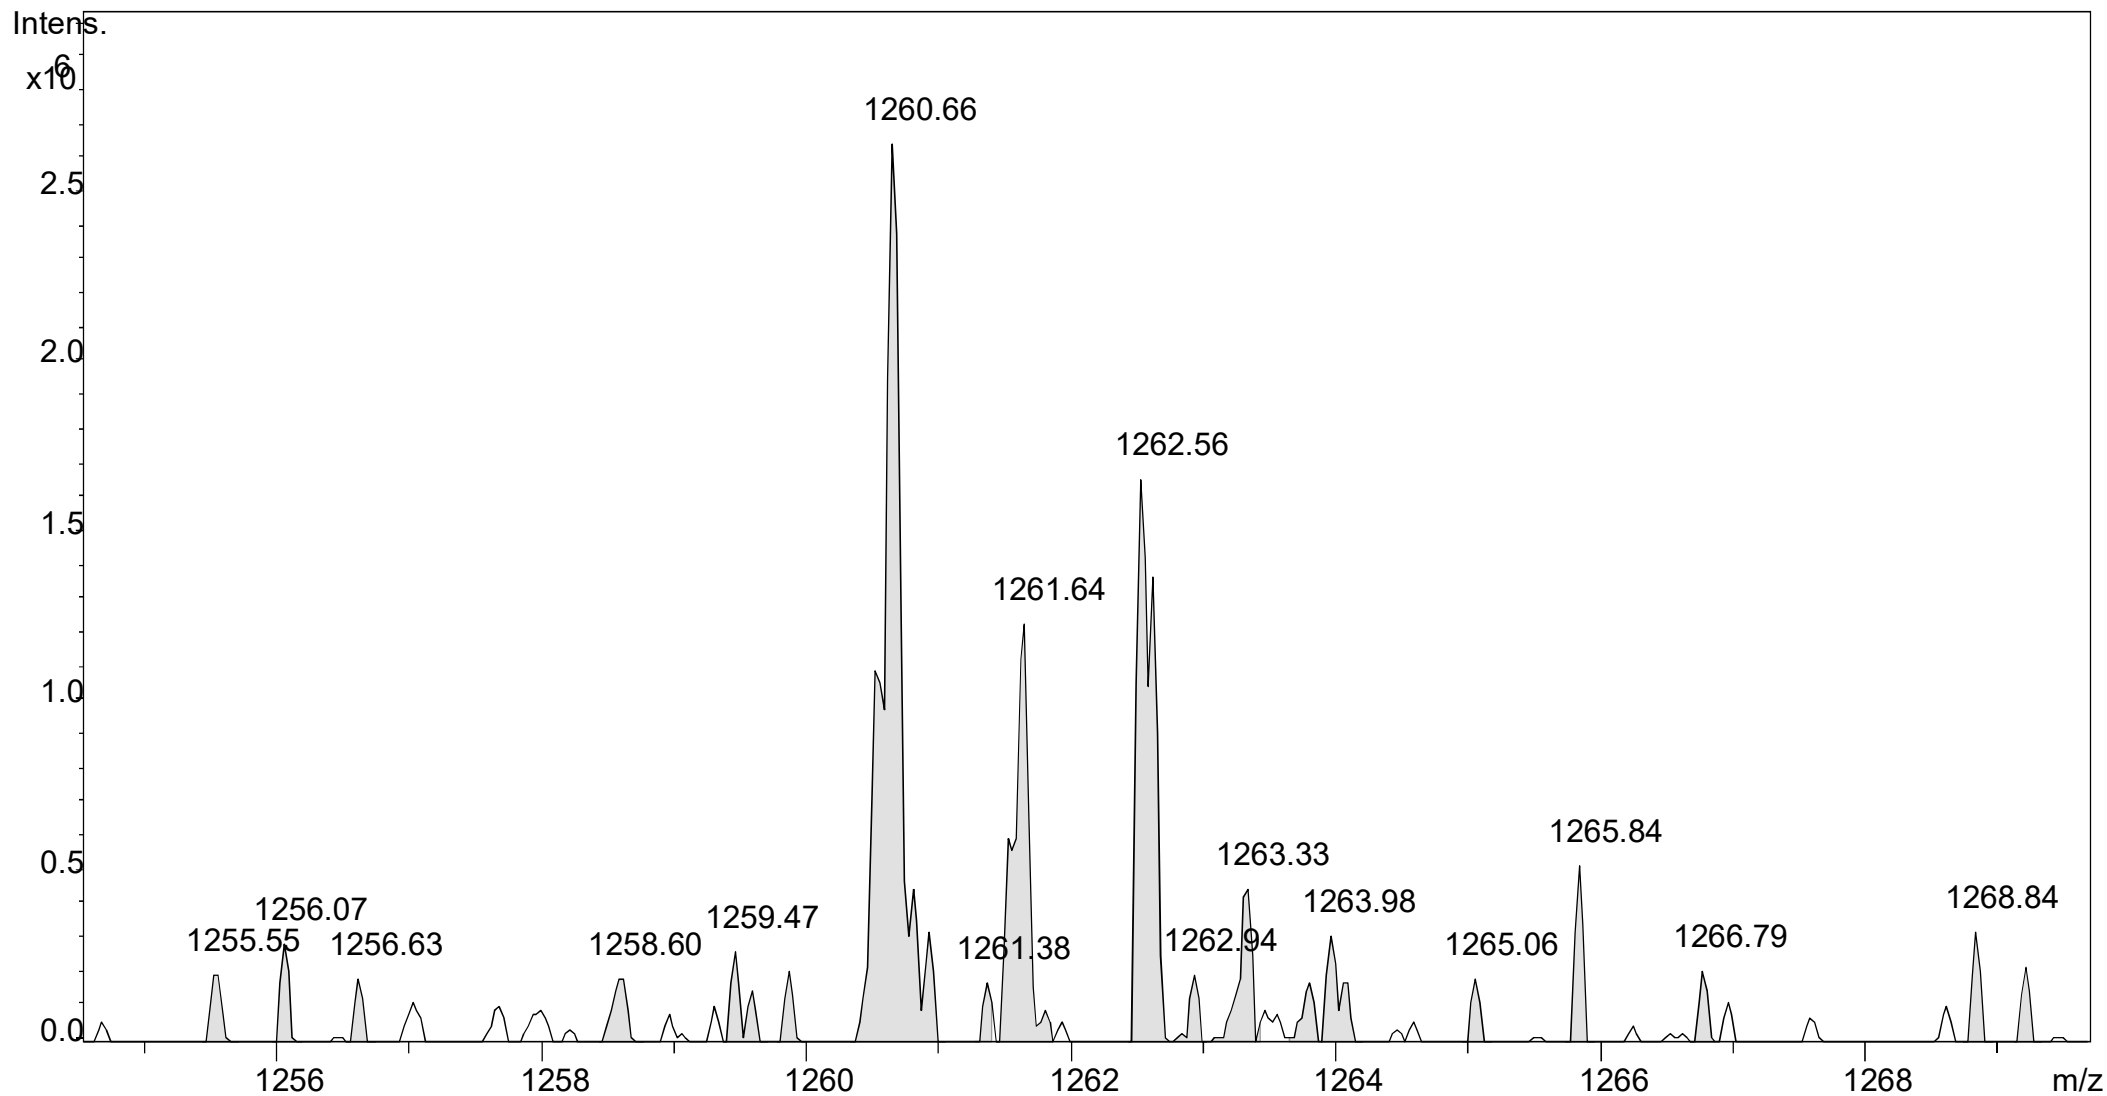

# Glycan 38a

A1G0-M4  
(H4N3)

Monoisotopic mass: 1277.47 Da  
Charge observed: 1-  
Theoretical ion:  $m/z$  1276.47  
Observed ion:  $m/z$  1276.63  
Mass deviation:  $m/z$  0.16  
Retention time: 43.6 min

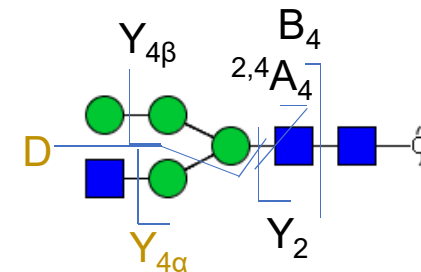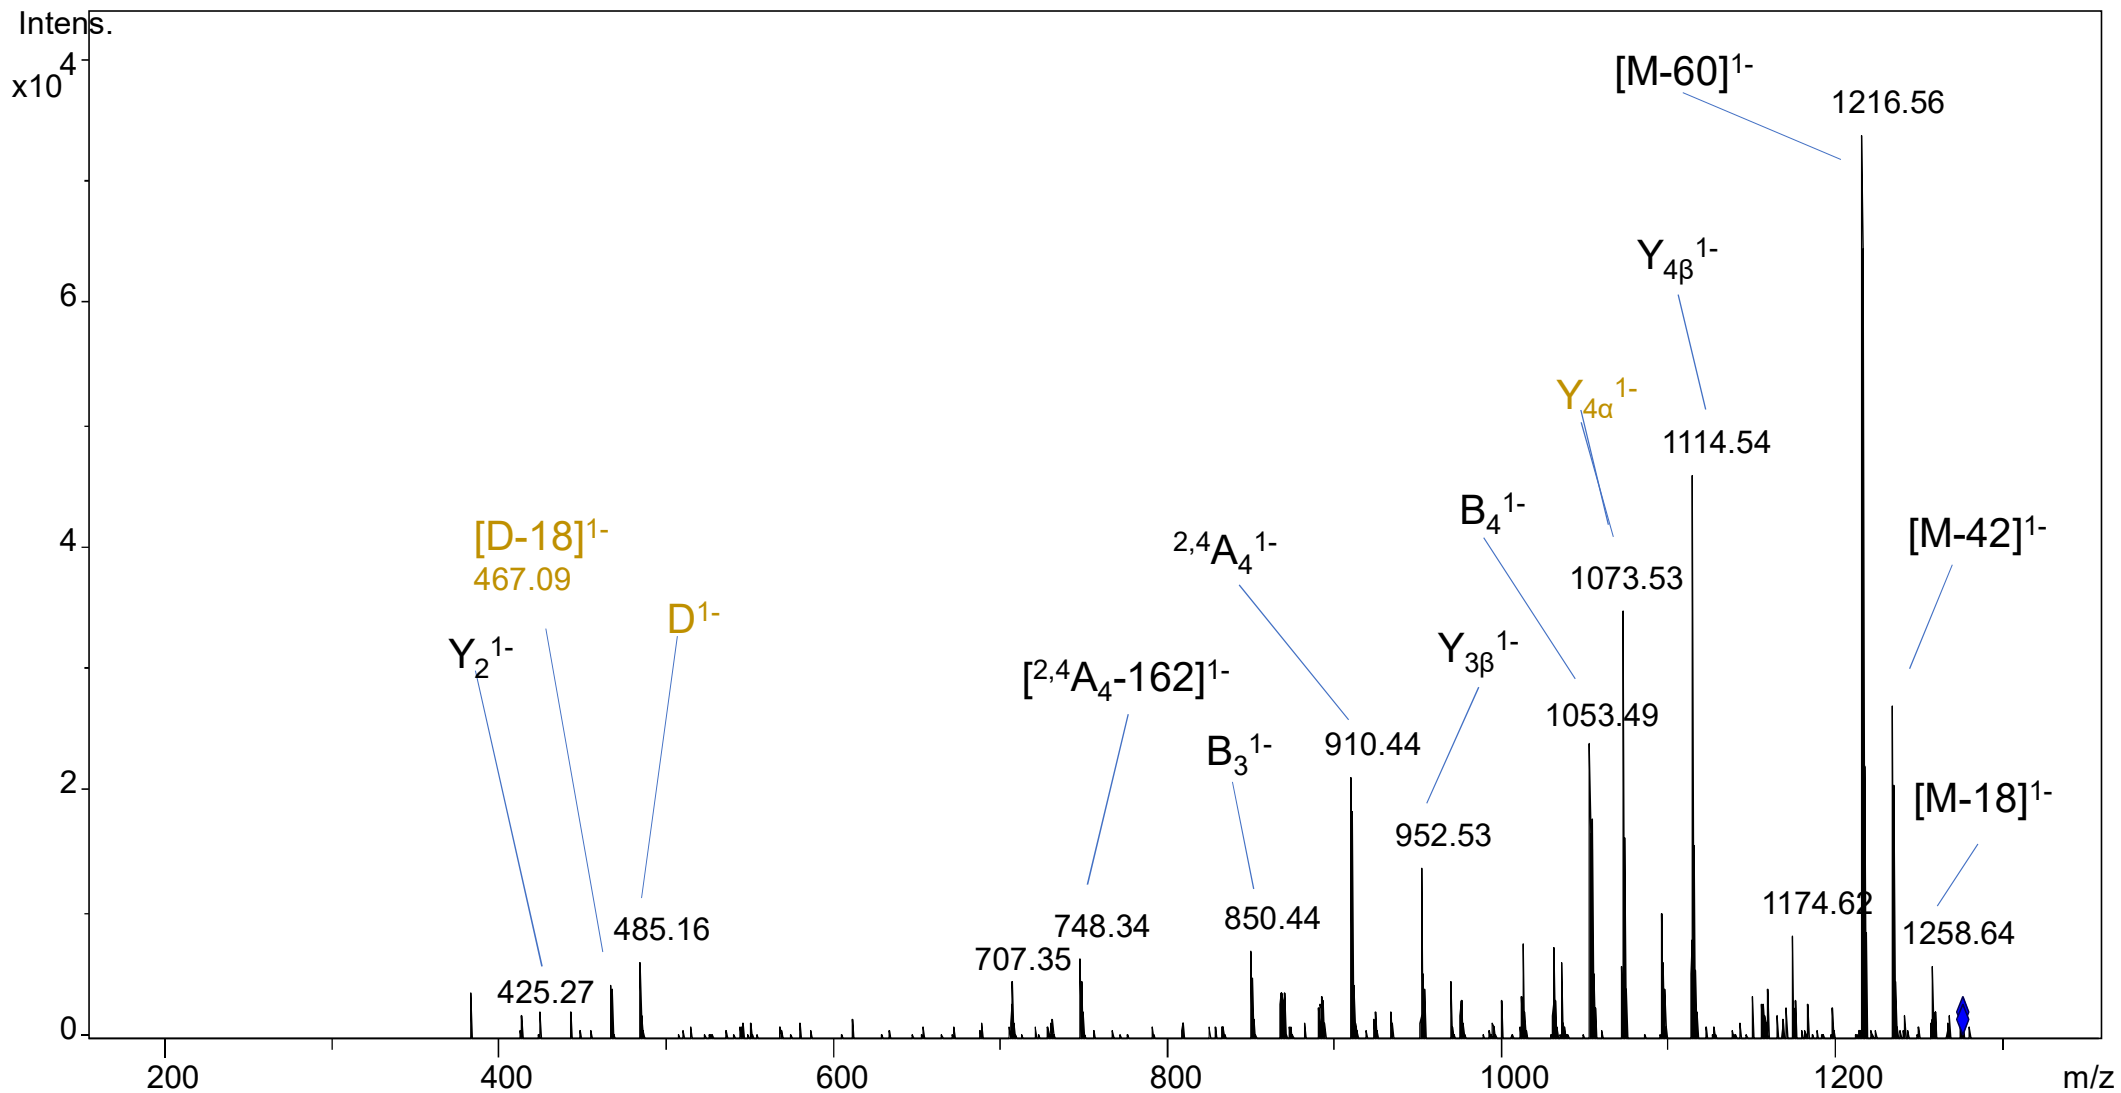

# Glycan 38b

A1G1  
(H4N3)

Monoisotopic mass: 1277.47 Da  
Charge observed: 1-  
Theoretical ion:  $m/z$  1276.47  
Observed ion:  $m/z$  1276.61  
Mass deviation:  $m/z$  0.14  
Retention time: 50.4 min

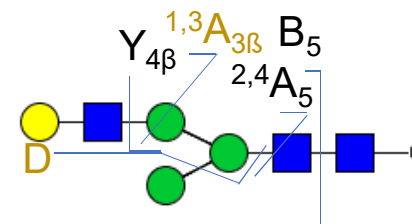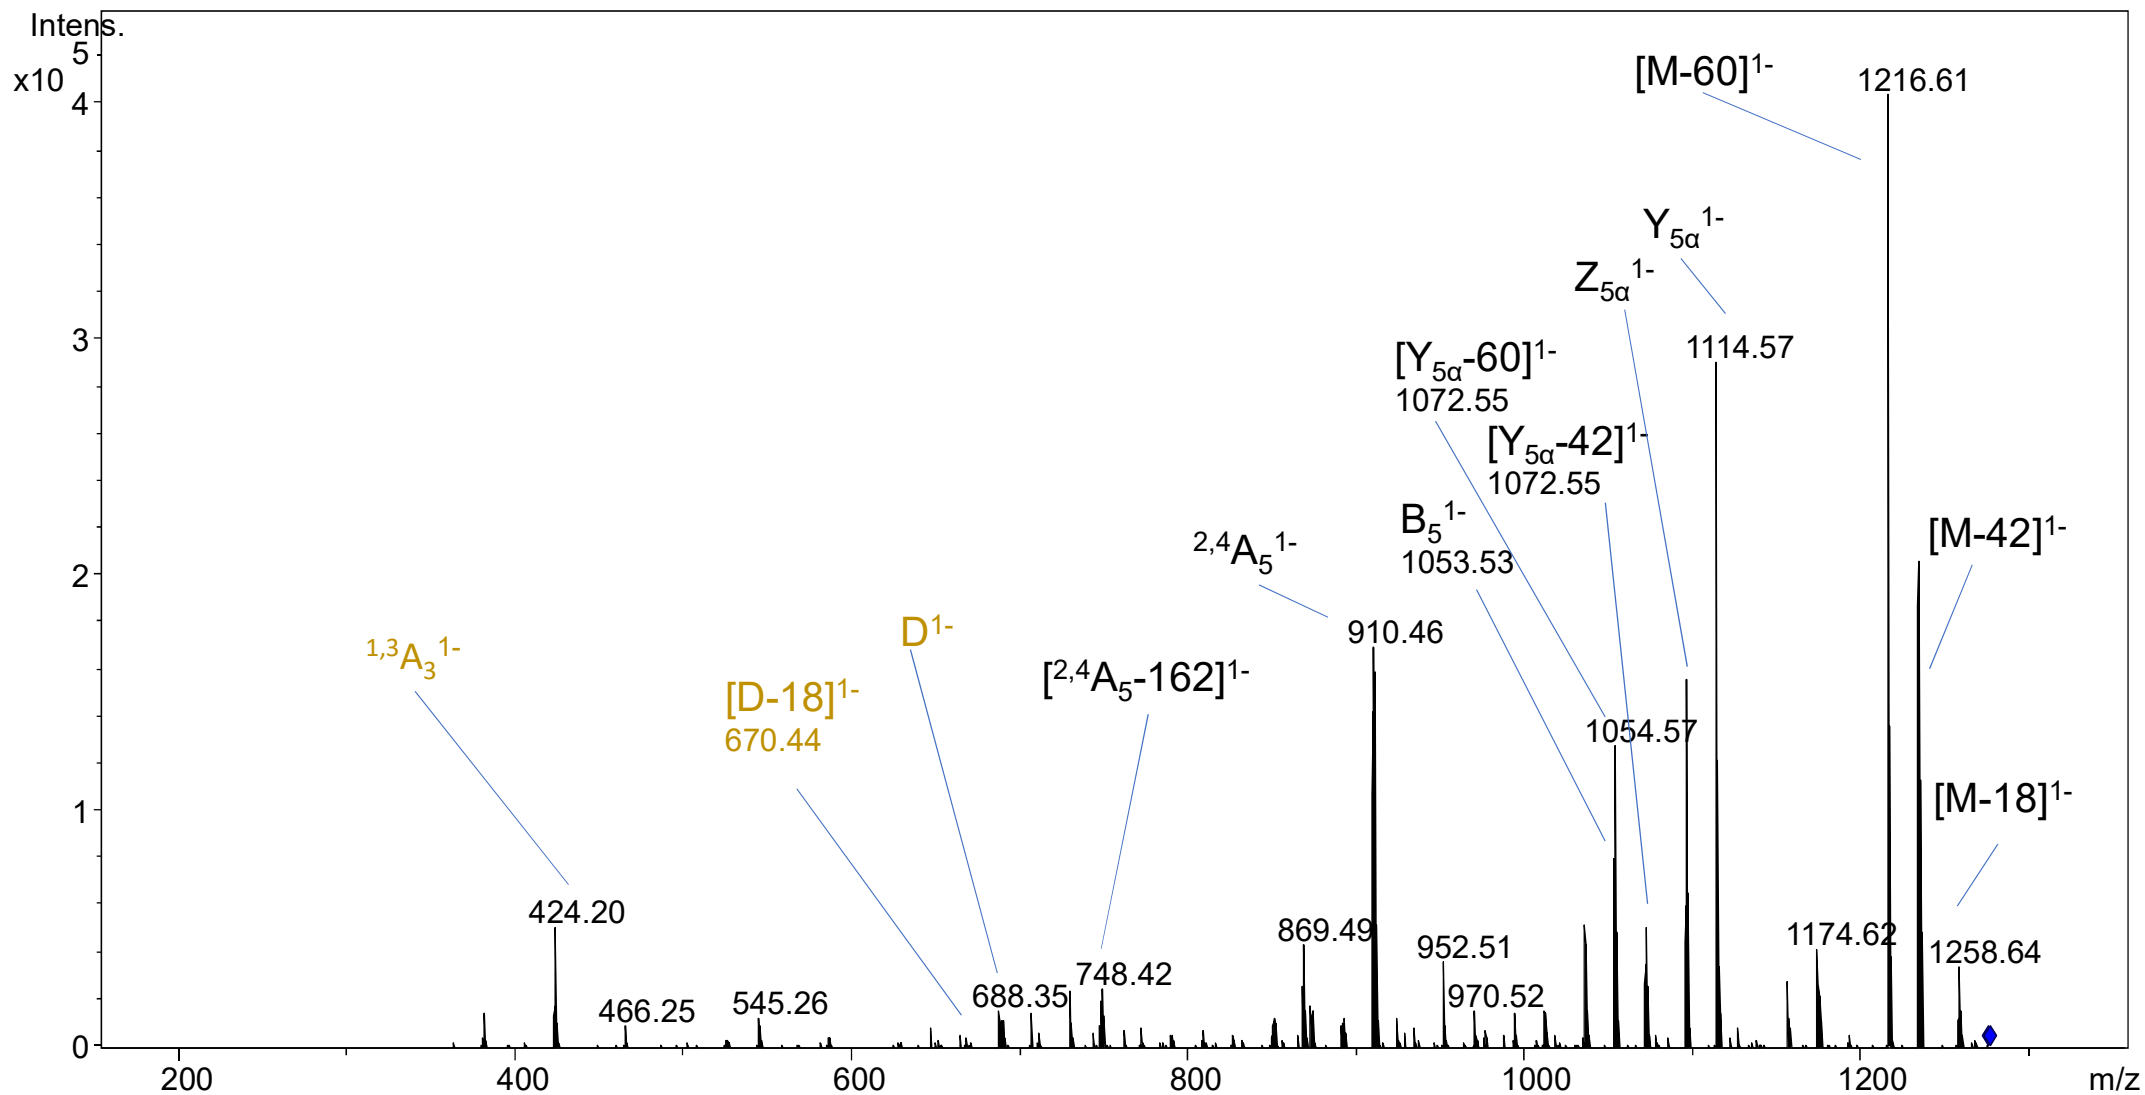

# Glycan 39

A1S1  
(H4N3S1)

Monoisotopic mass: 1567.56 Da  
Charge observed: 1-  
Theoretical ion:  $m/z$  783.28  
Observed ion:  $m/z$  783.39  
Mass deviation:  $m/z$  0.11  
Retention time: 60.0 min

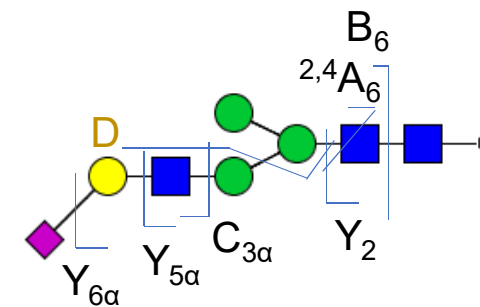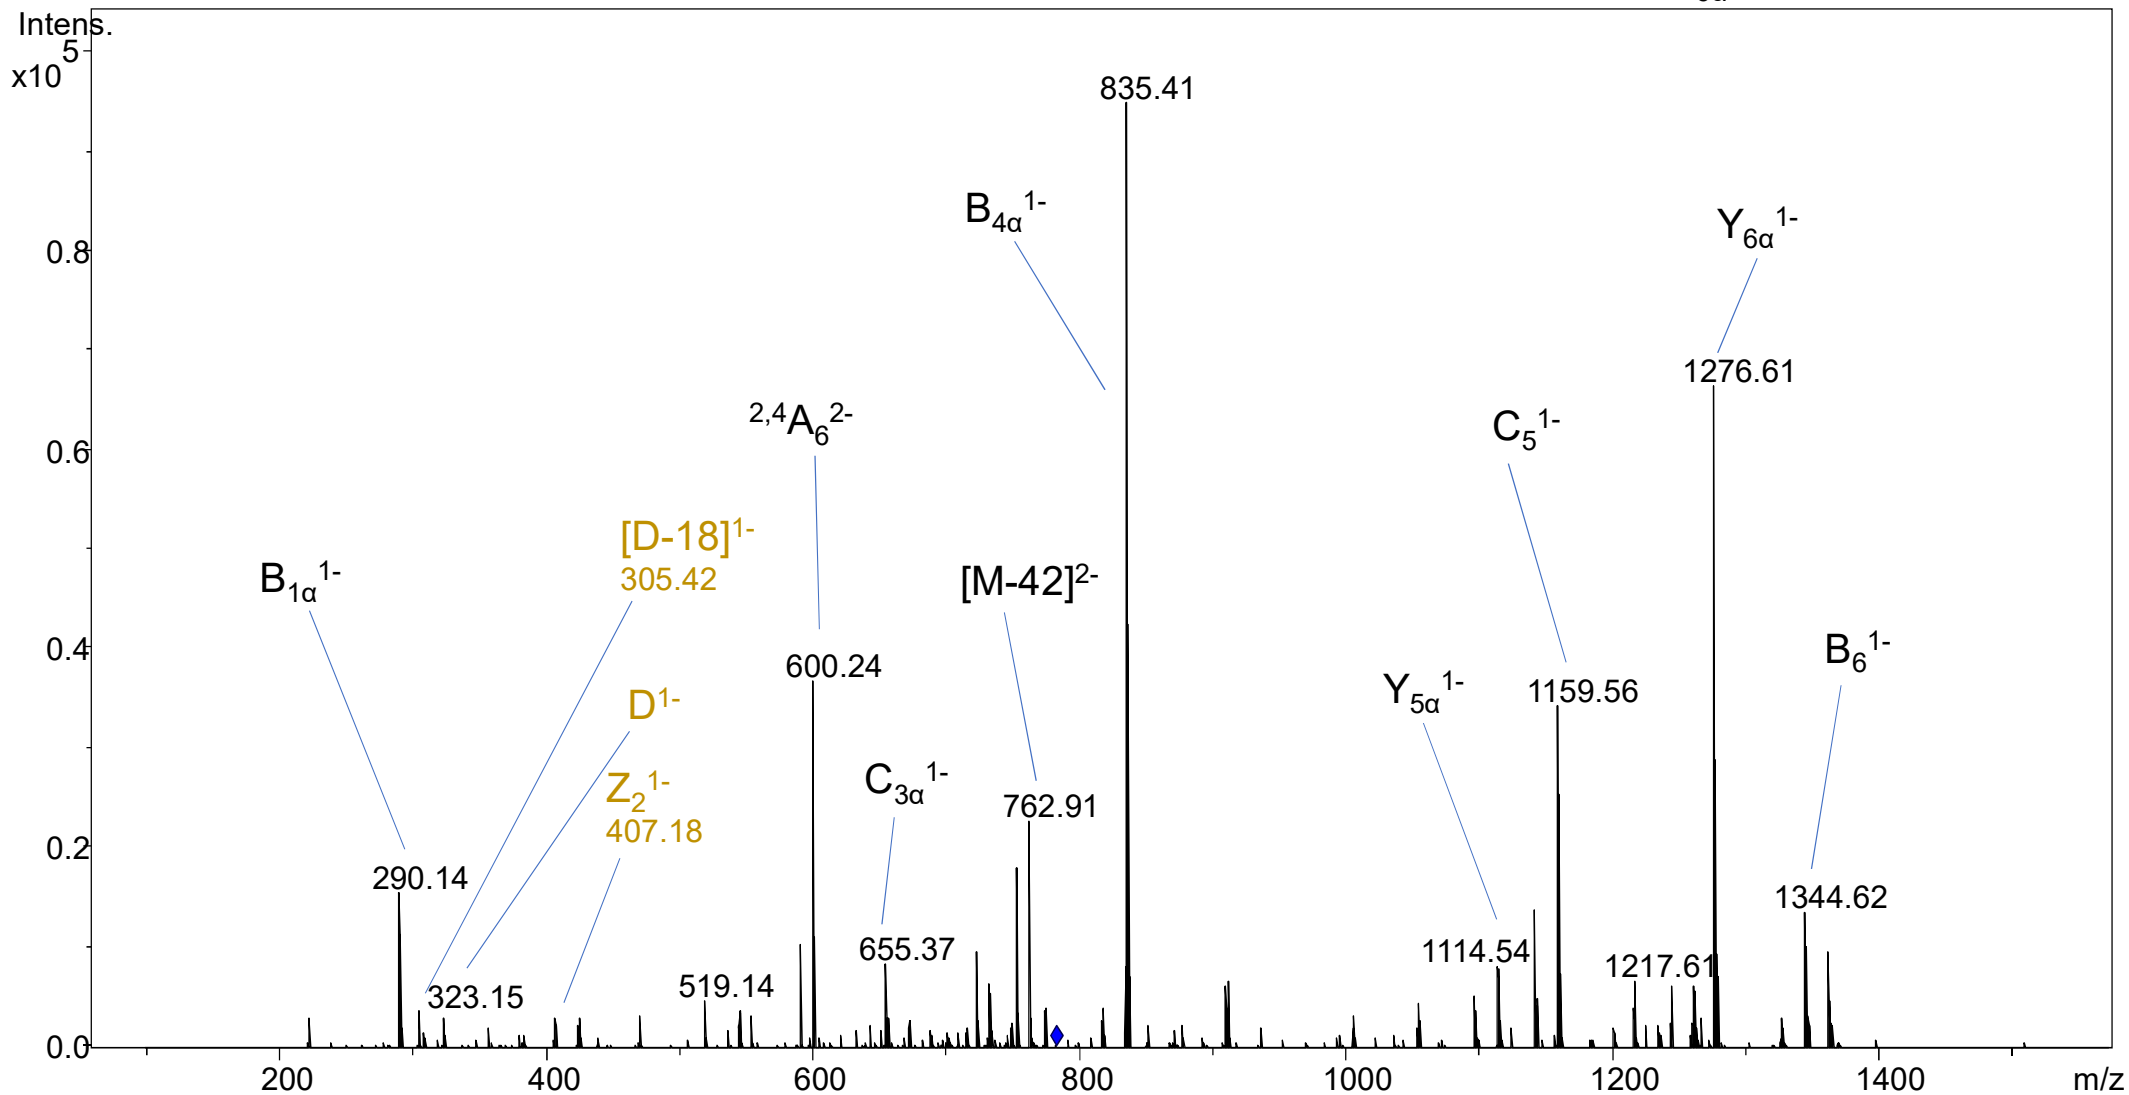



# Glycan 40

A1G1-M5  
(H6N3)

Monoisotopic mass: 1601.59 Da  
Charge observed: 2-  
Theoretical ion:  $m/z$  799.78  
Observed ion:  $m/z$  799.88  
Mass deviation:  $m/z$  0.10  
Retention time: 52.8 min

UniCarb-DB: #2482

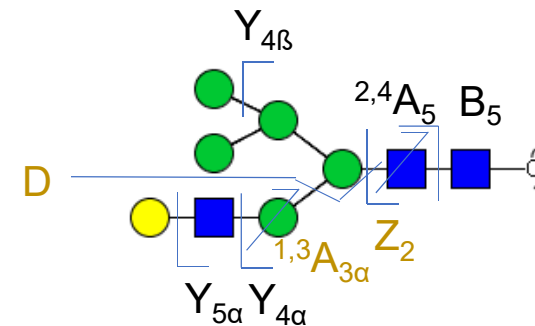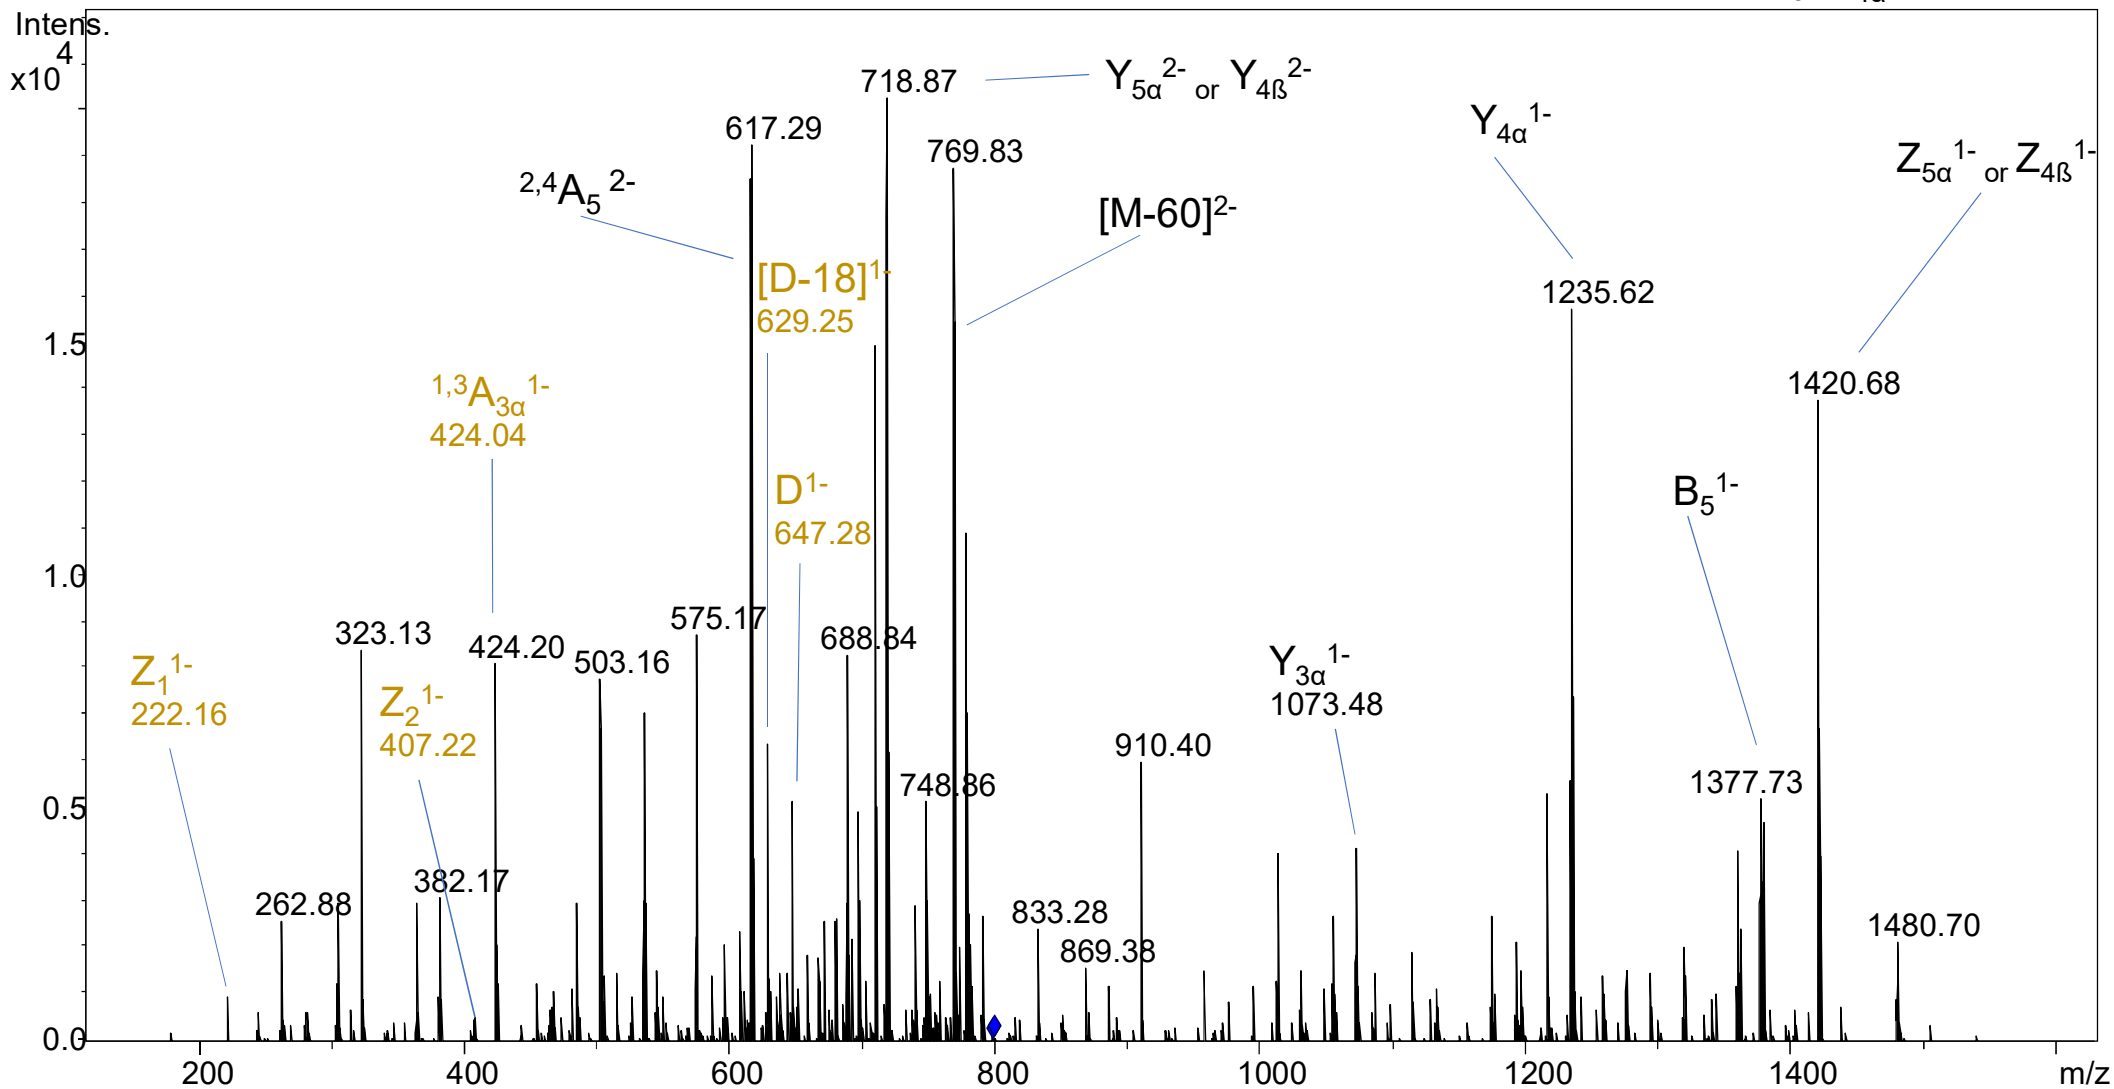

# Glycan 41

A1G1-M5P  
(H6N3P1)

Monoisotopic mass: 1681.55 Da  
Charge observed: 2-  
Theoretical ion:  $m/z$  839.77  
Observed ion:  $m/z$  839.84  
Mass deviation:  $m/z$  0.07  
Retention time: 39.0 min  
Note: Isomer to glycan 12.

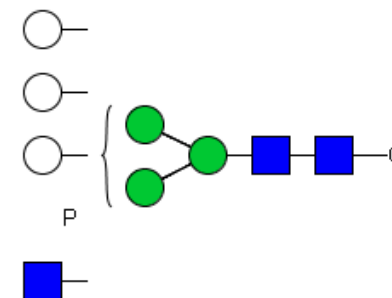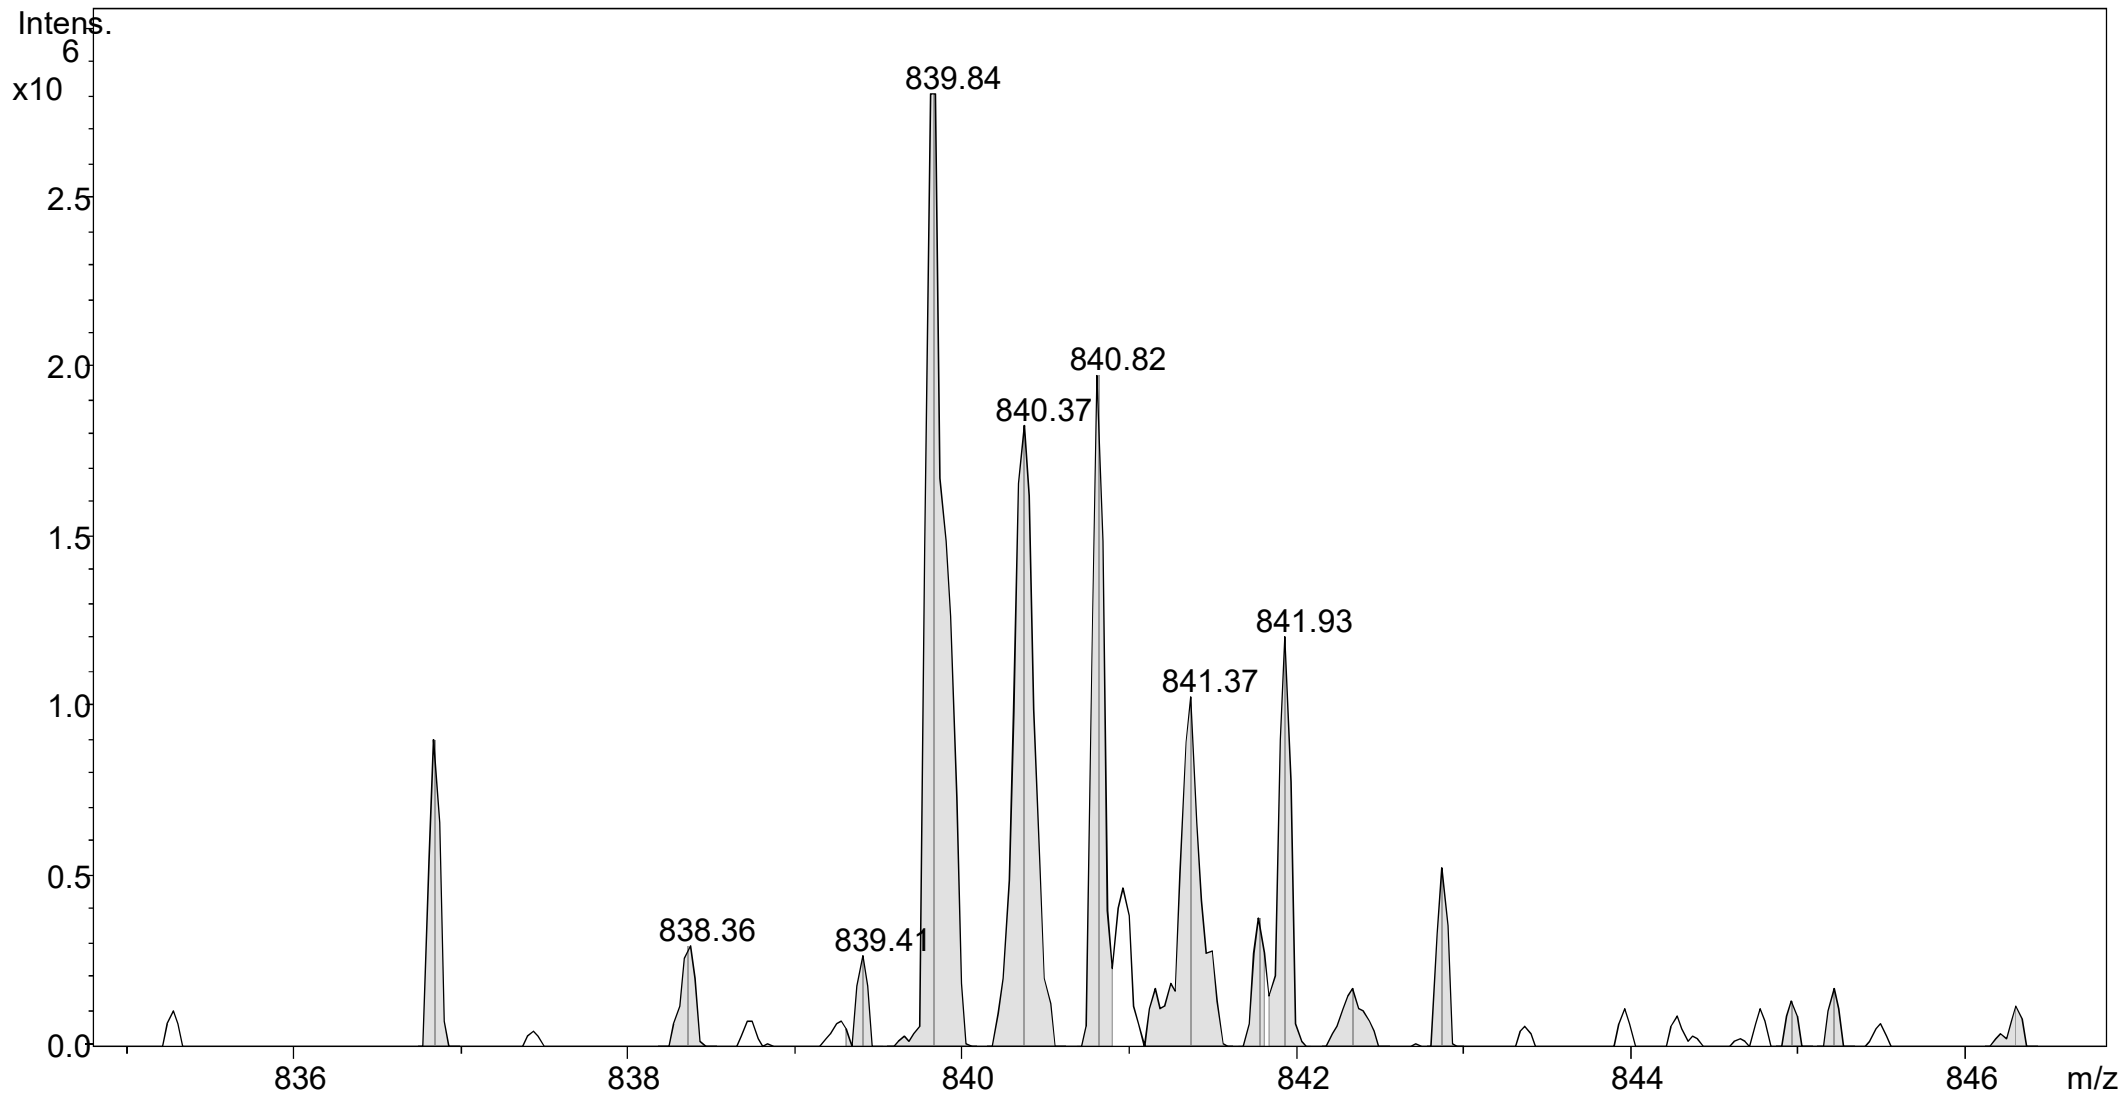

# Glycan 42a

A1S1F  
(H4N3F1S1)

Monoisotopic mass: 1714.63 Da  
Charge observed: 2-  
Theoretical ion:  $m/z$  856.30  
Observed ion:  $m/z$  856.43  
Mass deviation:  $m/z$  0.13  
Retention time: 66.6 min

UniCarb-DB: #2220

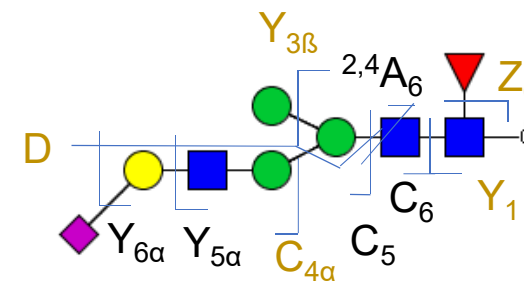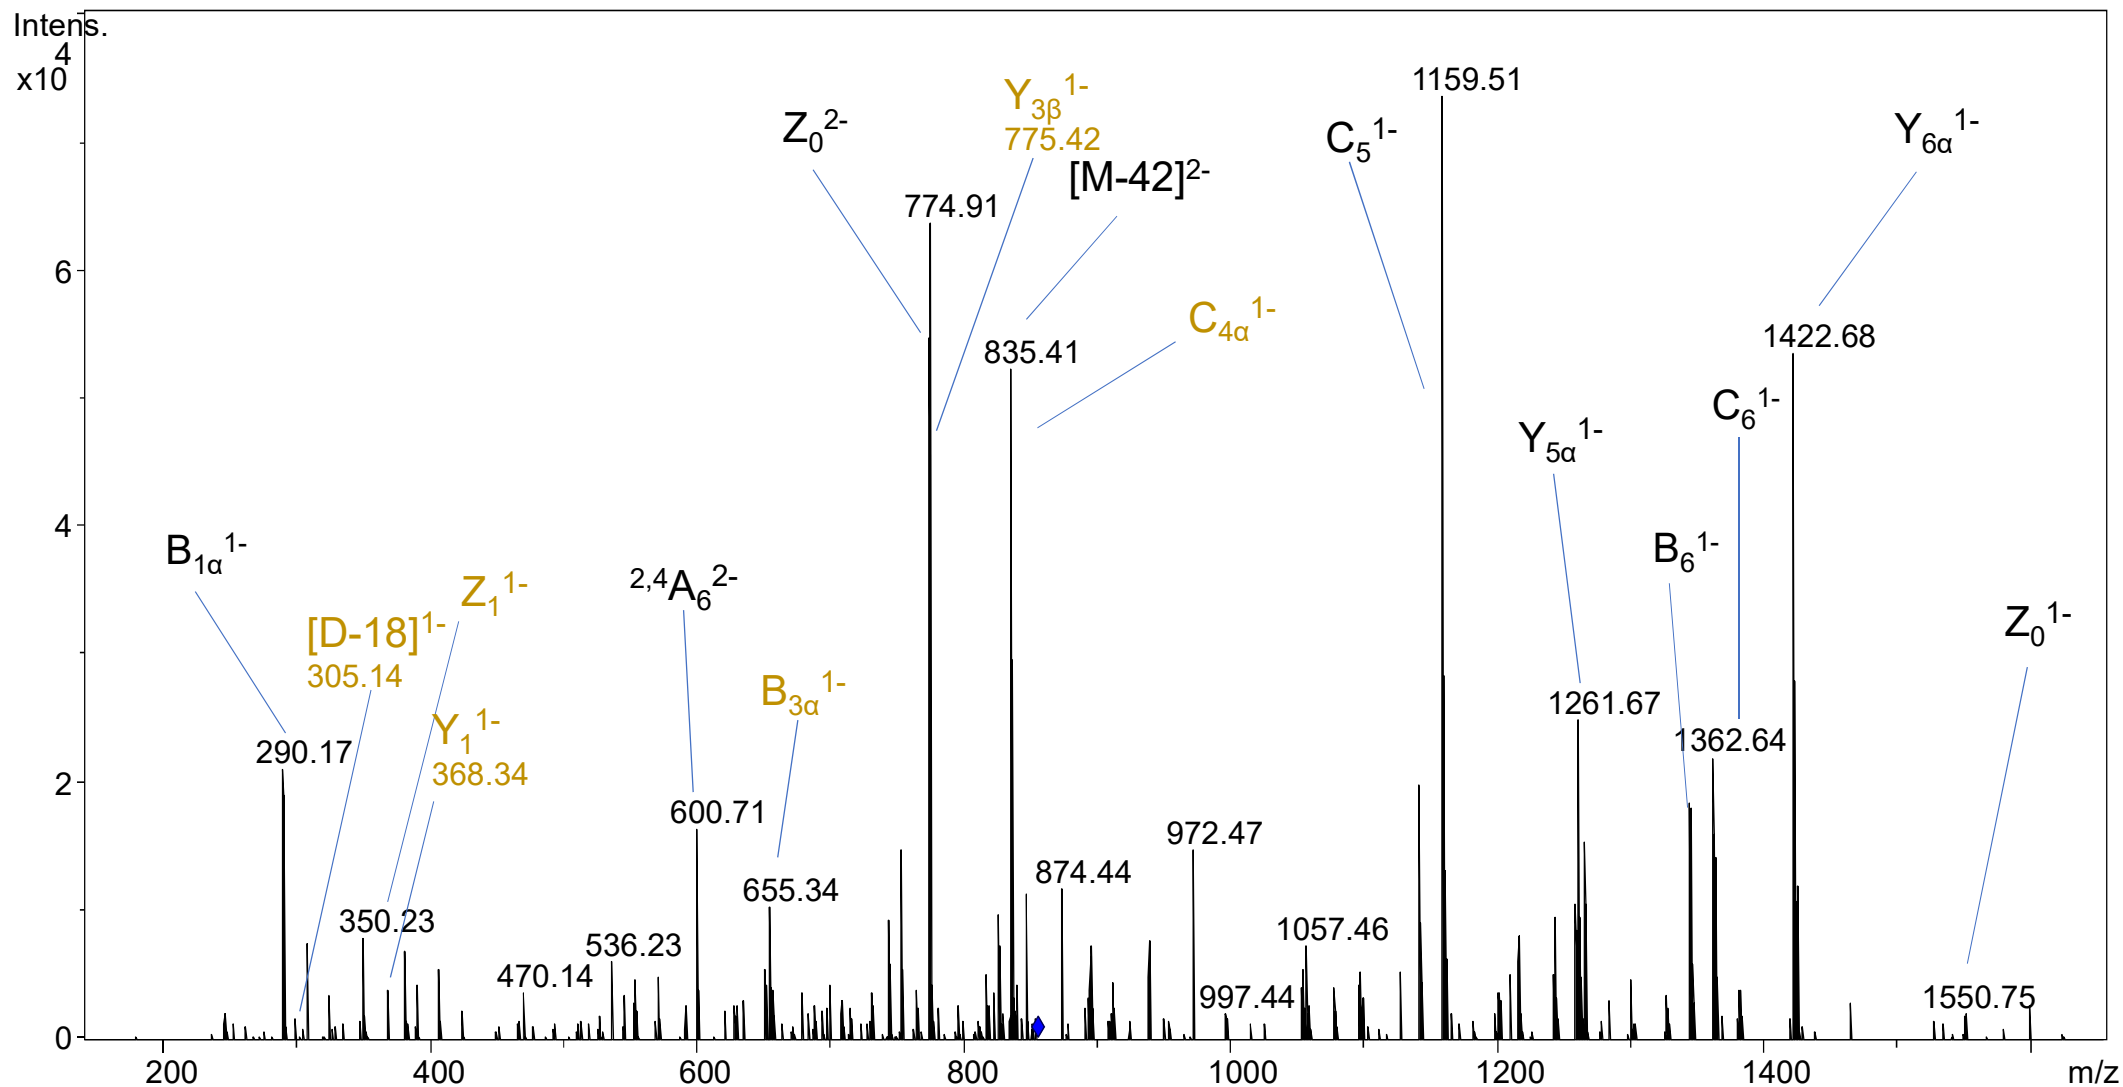

# Glycan 42b

A1S1F  
(H4N3F1S1)

Monoisotopic mass: 1714.63 Da  
Charge observed: 2-  
Theoretical ion:  $m/z$  856.30  
Observed ion:  $m/z$  856.46  
Mass deviation:  $m/z$  0.16  
Retention time: 77.1 min

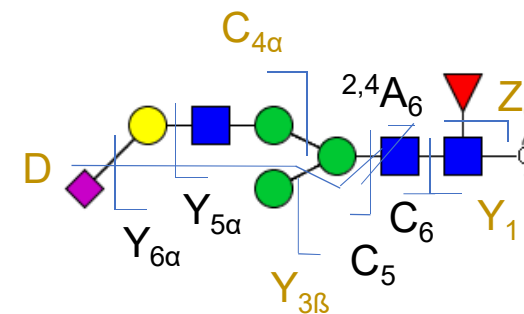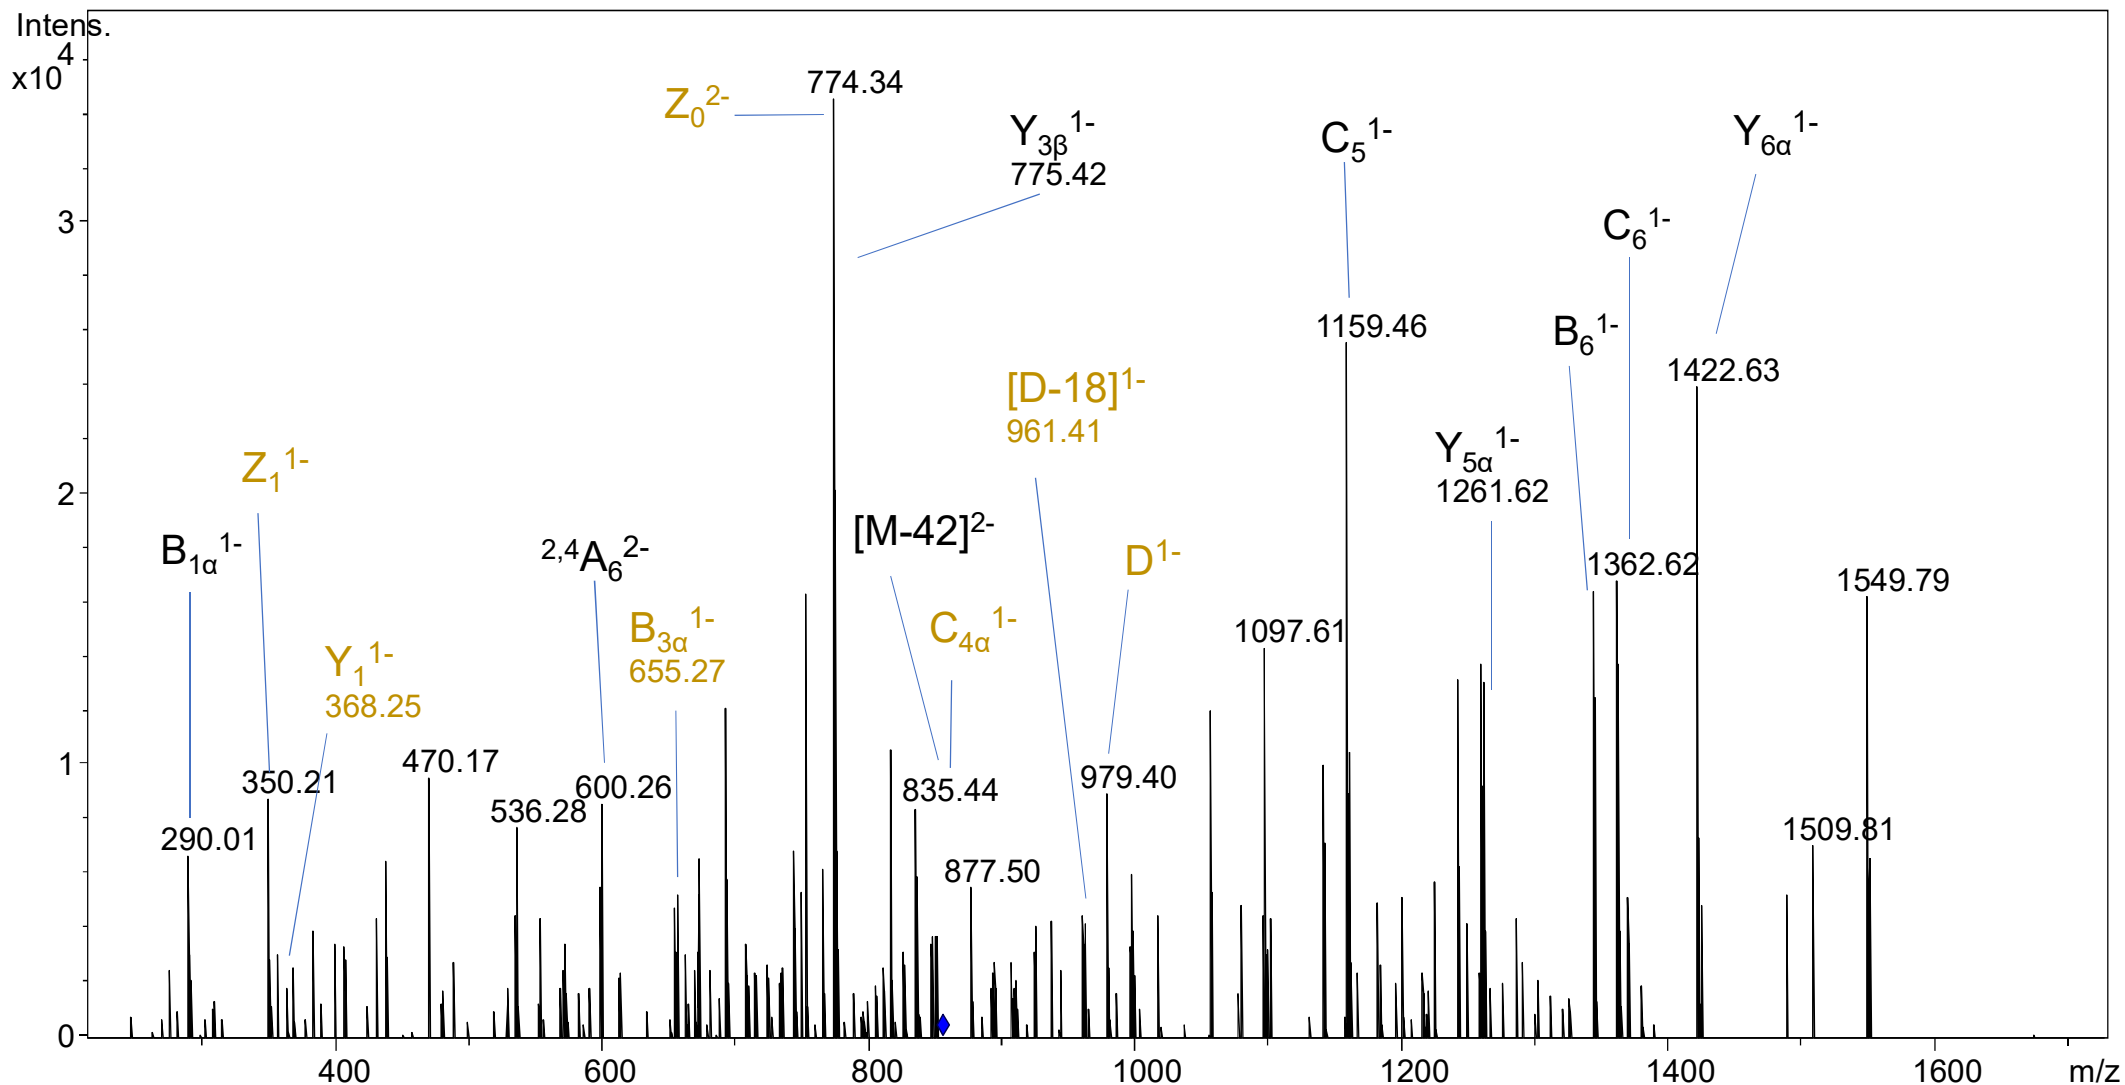

# Glycan 43

A1S1-M4  
(H5N3S1)

Monoisotopic mass: 1730.62 Da  
Charge observed: 2-  
Theoretical ion:  $m/z$  864.30  
Observed ion:  $m/z$  864.44  
Mass deviation:  $m/z$  0.14  
Retention time: 58.6 min

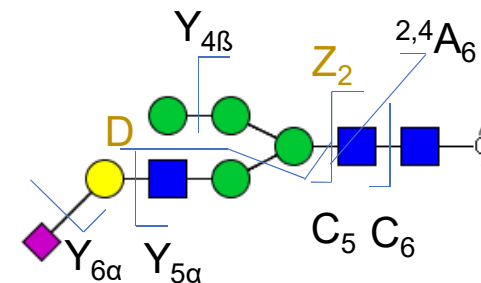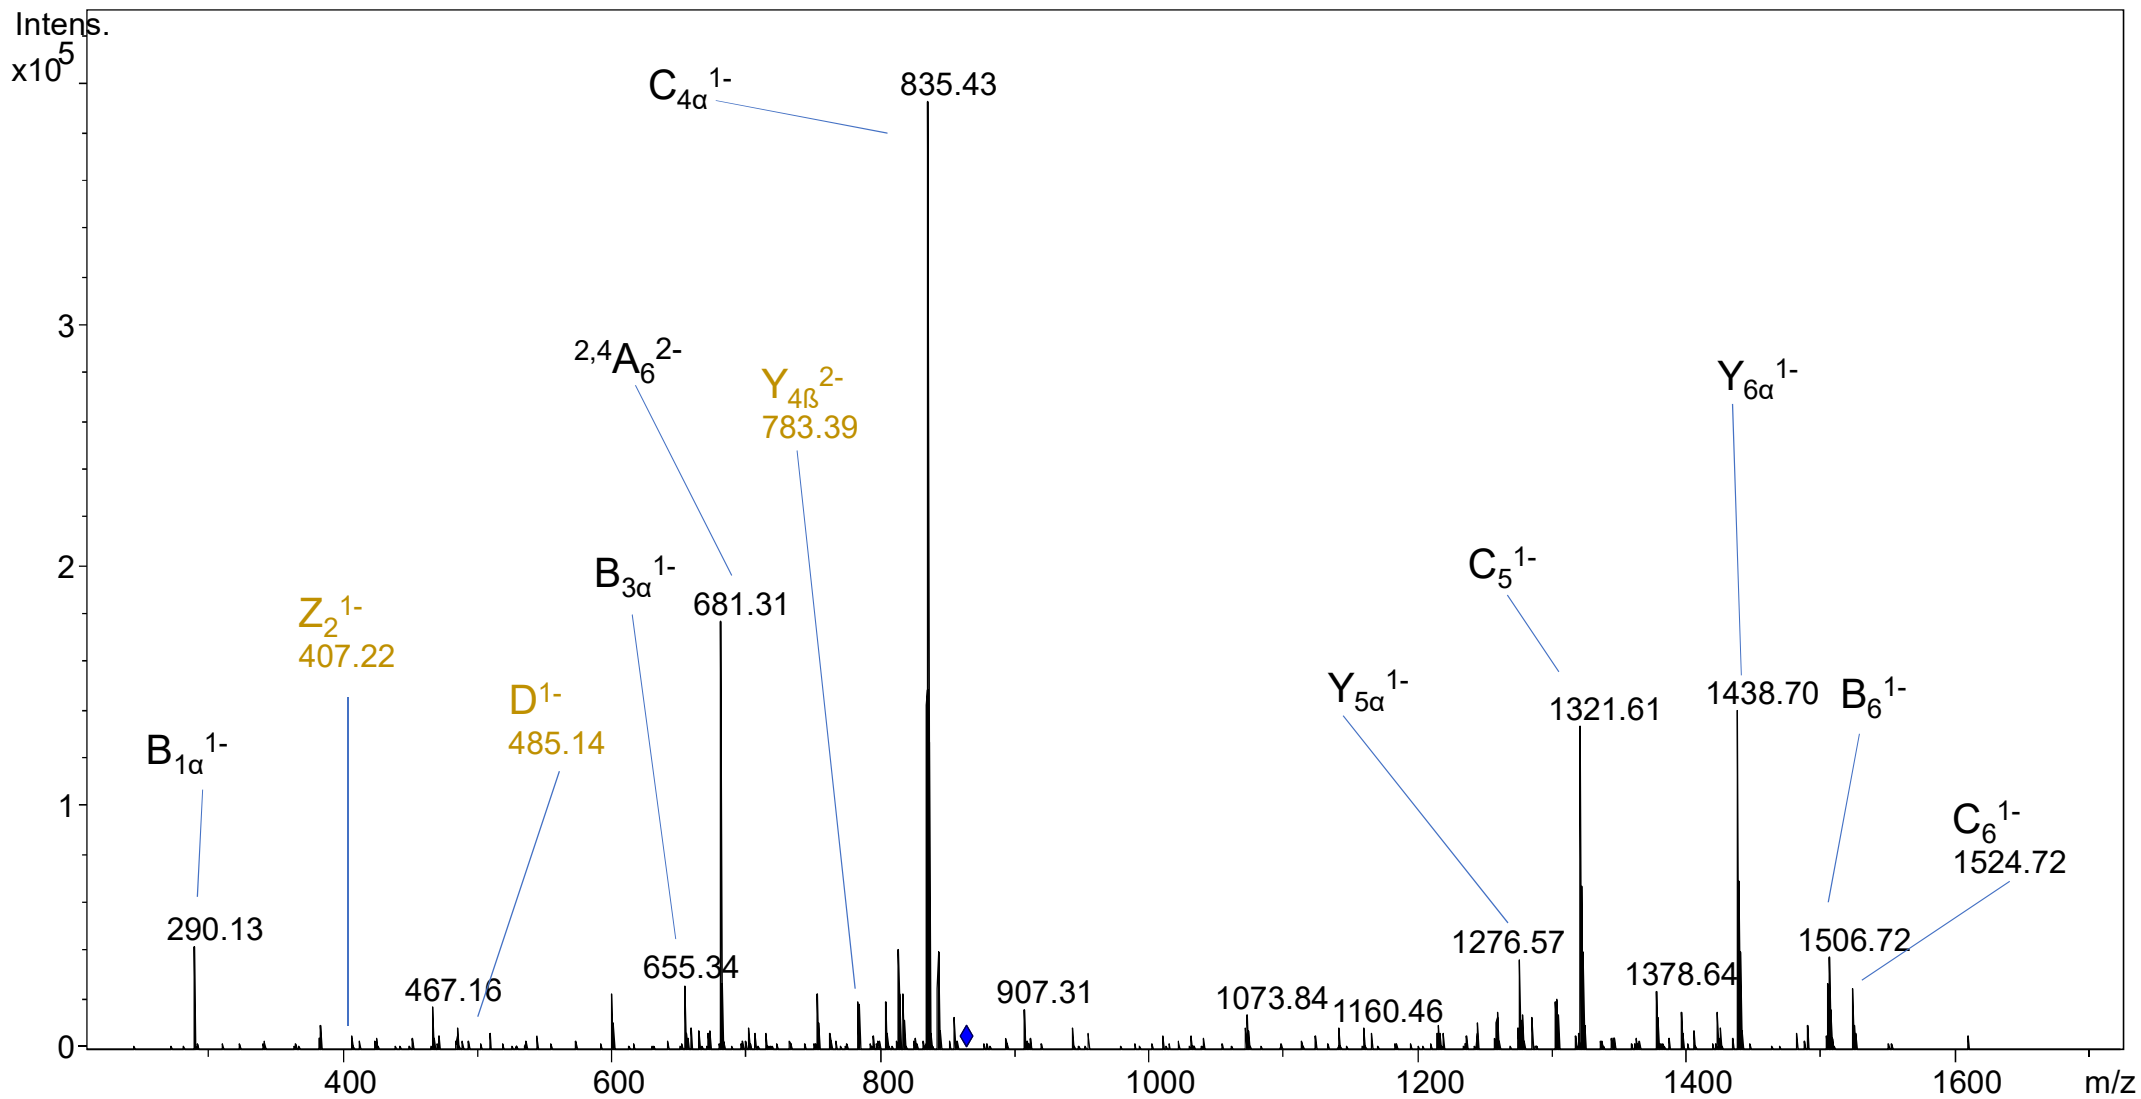



# Glycan 45

A1G1-M6P  
(H7N3P1)

Monoisotopic mass: 1843.60 Da  
Charge observed: 2-  
Theoretical ion:  $m/z$  920.79  
Observed ion:  $m/z$  920.93  
Mass deviation:  $m/z$  0.14  
Retention time: 41.4 min  
Note: Isomer to glycan 15.

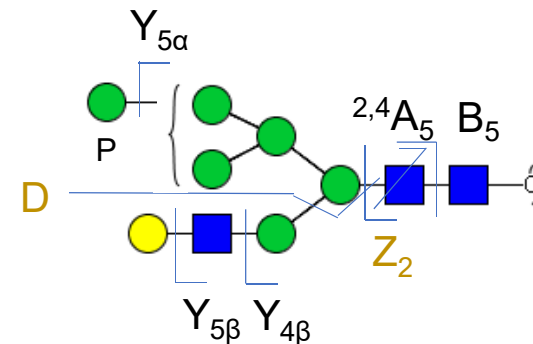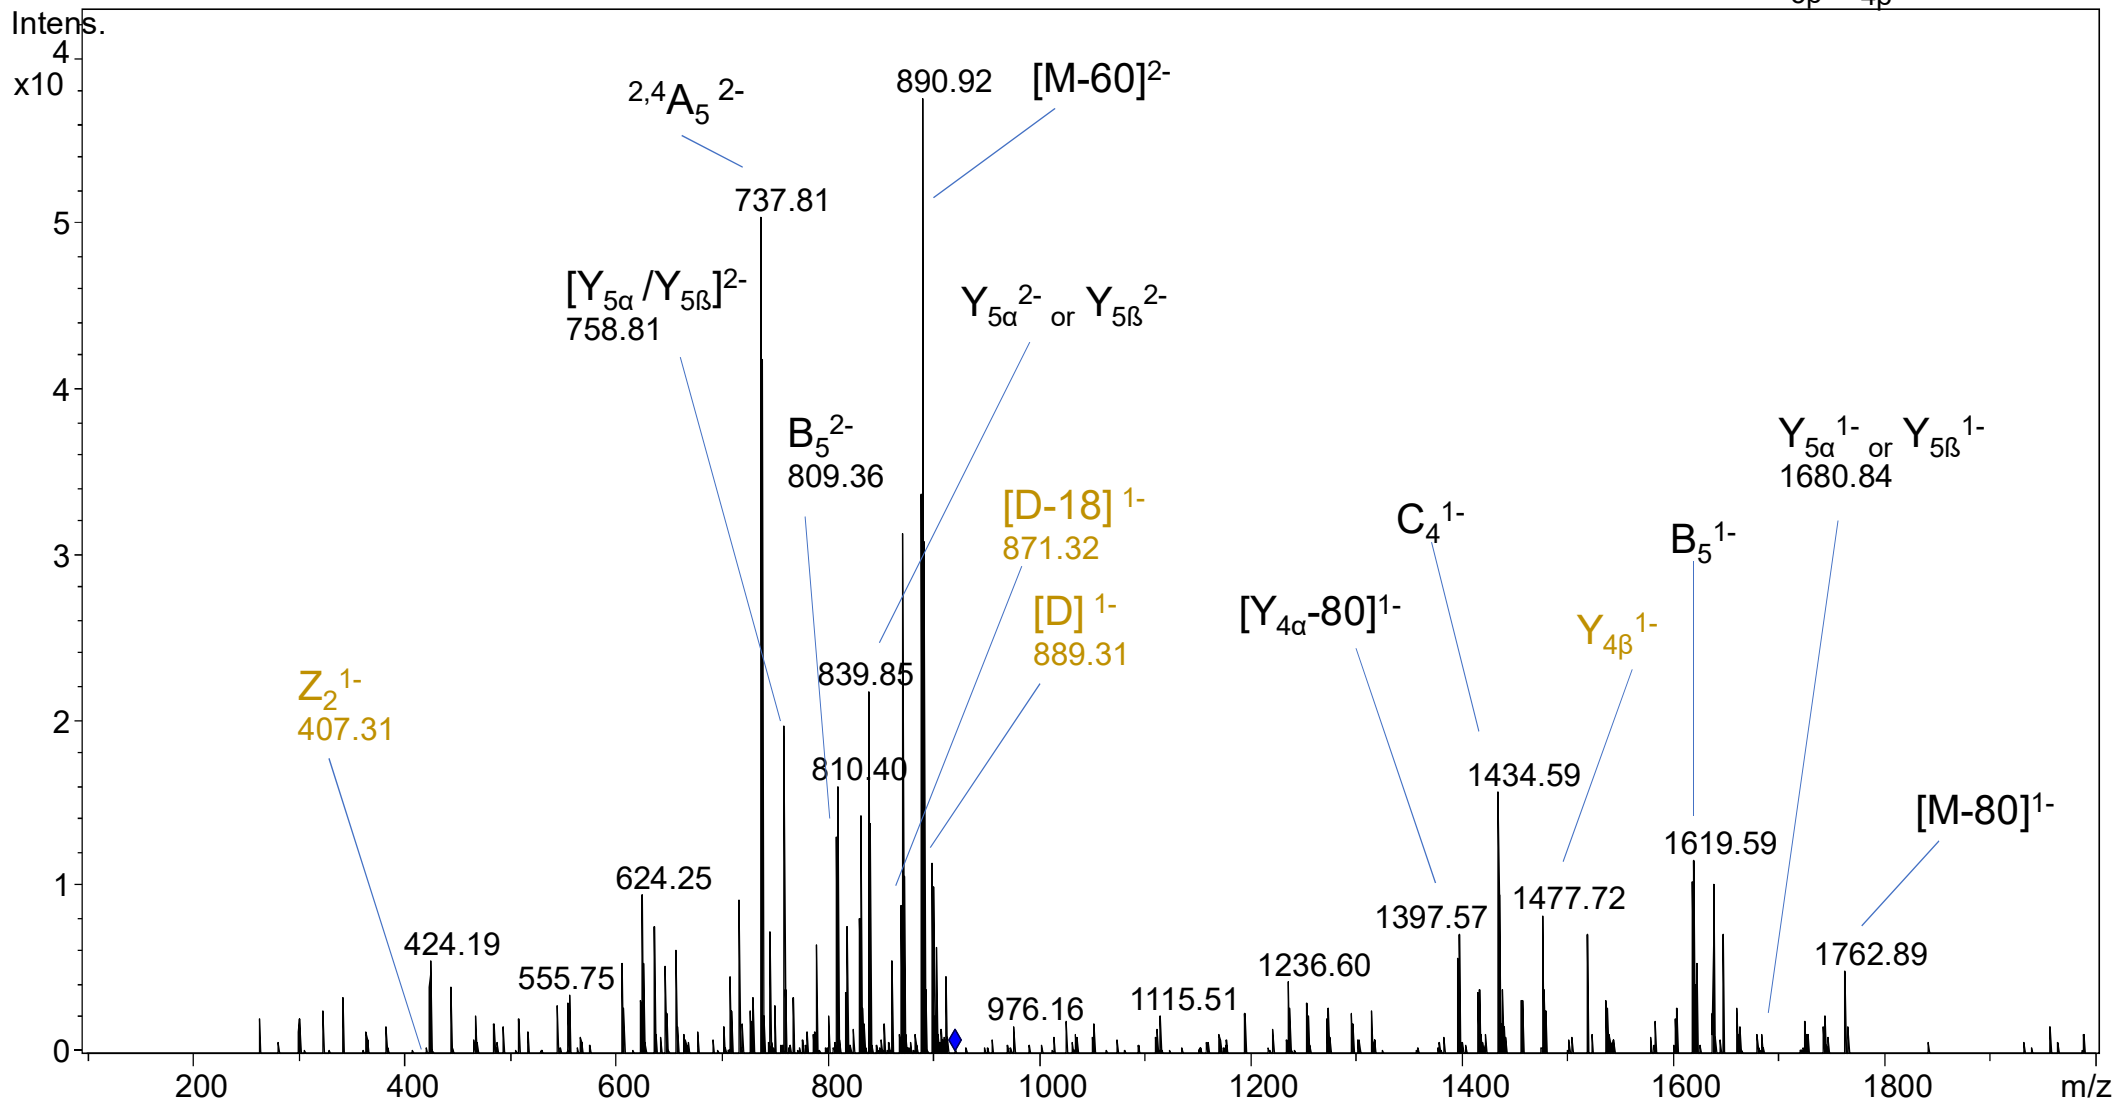

# Glycan 46

A1S1-M5  
(H6N3S1)

Monoisotopic mass: 1892.68 Da  
Charge observed: 2-  
Theoretical ion:  $m/z$  945.35  
Observed ion:  $m/z$  945.48  
Mass deviation:  $m/z$  0.01  
Retention time: 61.1 min

UniCarb-DB: #2523

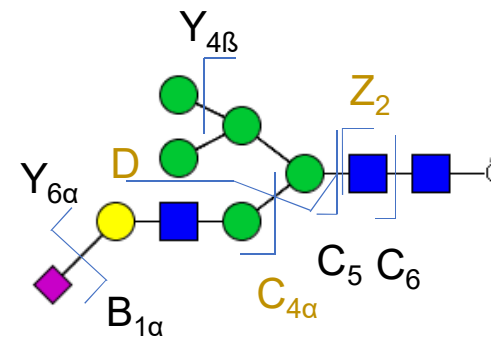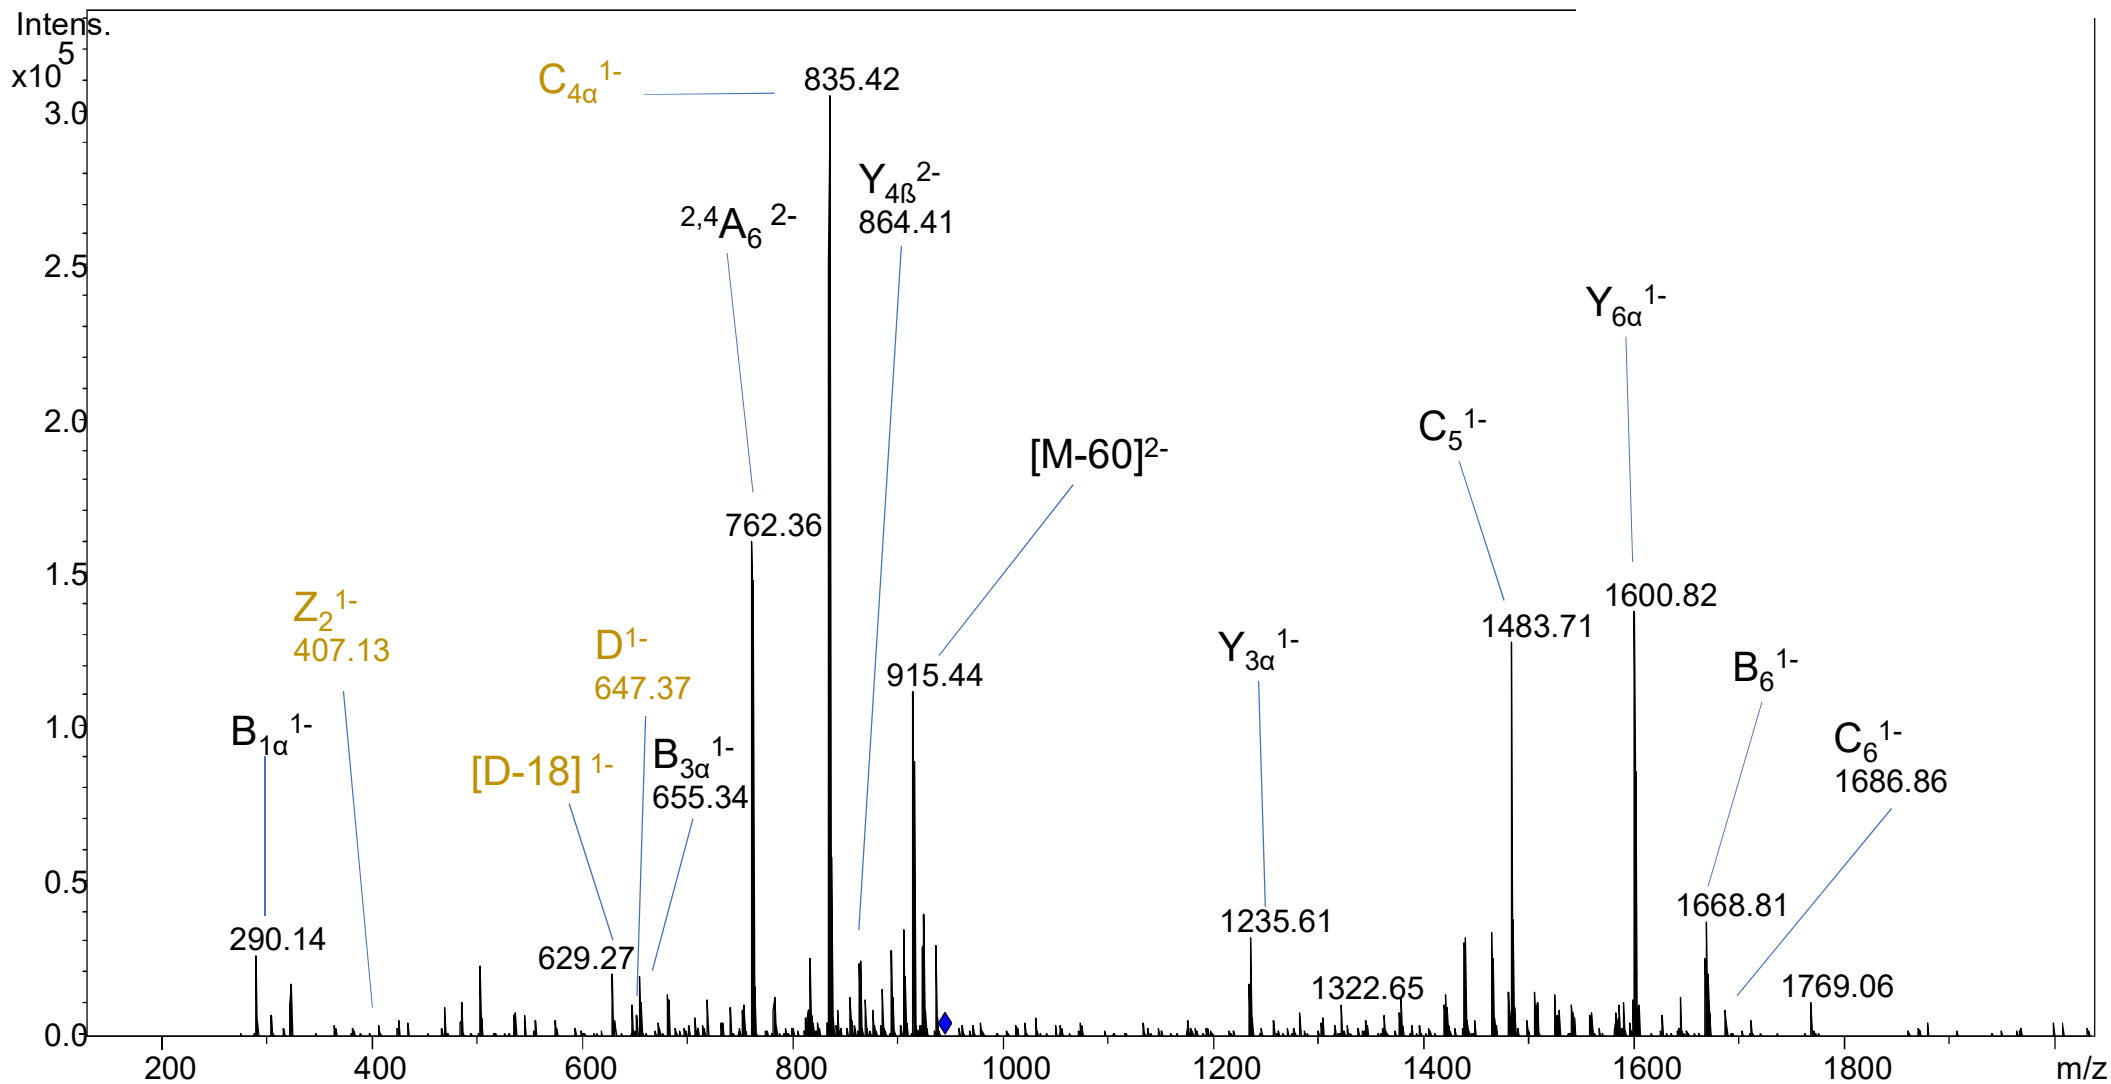



# Glycan 47

A1G1F-M6P  
(H7N3F1P1)

Monoisotopic mass: 1989.65 Da  
Charge observed: 2-  
Theoretical ion:  $m/z$  993.82  
Observed ion:  $m/z$  993.96  
Mass deviation:  $m/z$  0.14  
Retention time: 48.7 min

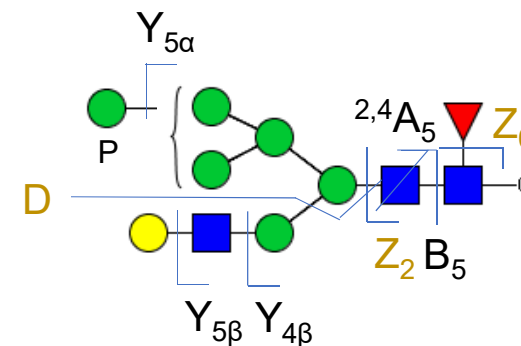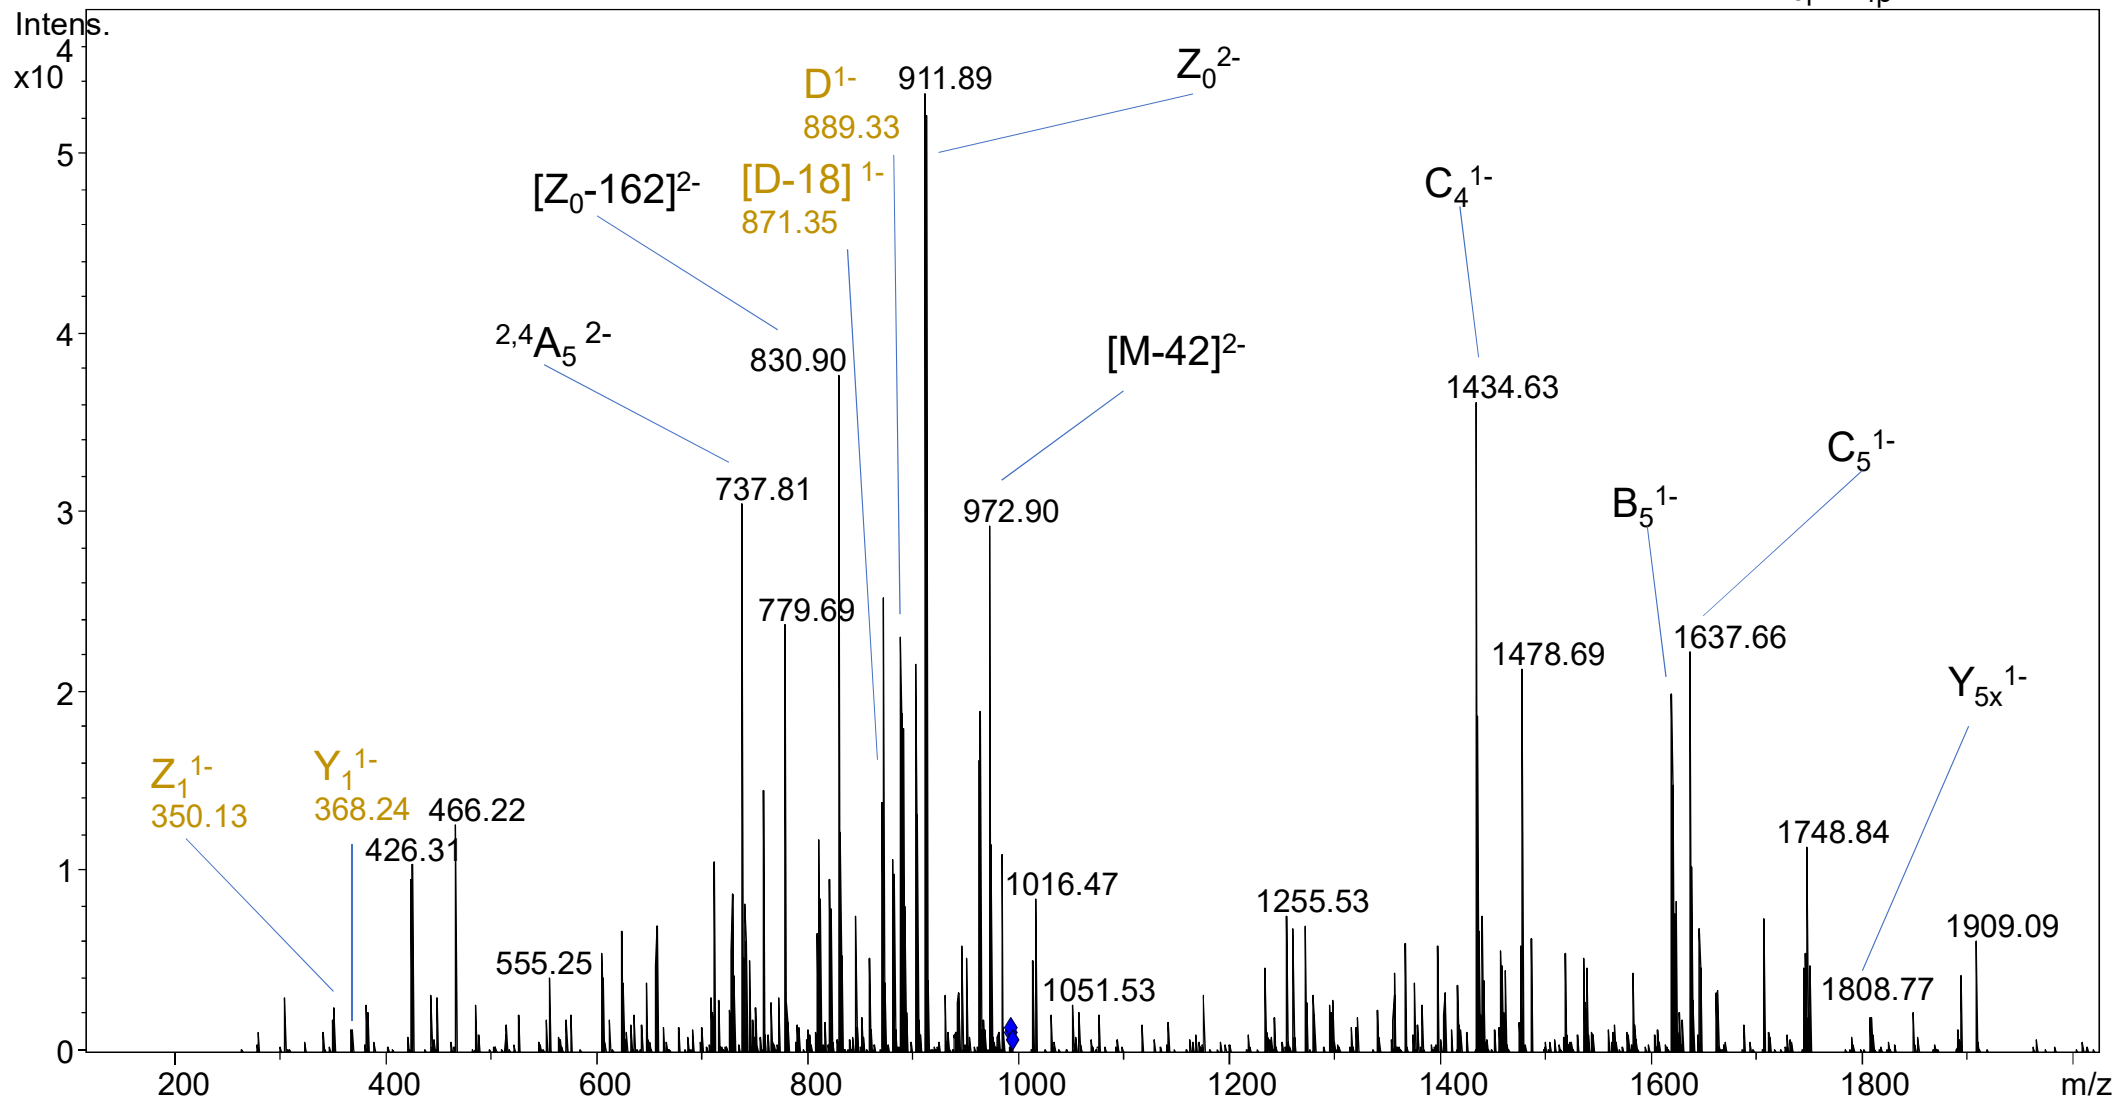

# Glycan 48

A1S1-M6P  
(H7N3S1P1)

Monoisotopic mass: 2134.69 Da  
Charge observed: 2-  
Theoretical ion:  $m/z$  1066.34  
Observed ion:  $m/z$  1066.48  
Mass deviation:  $m/z$  0.14  
Retention time: 51.0 min

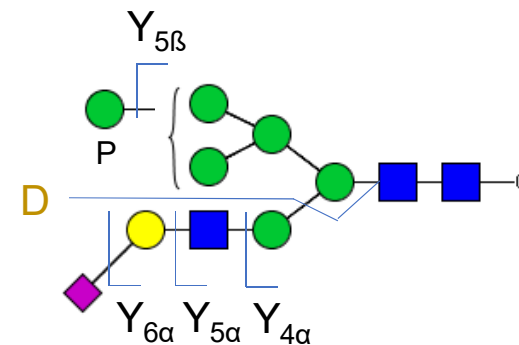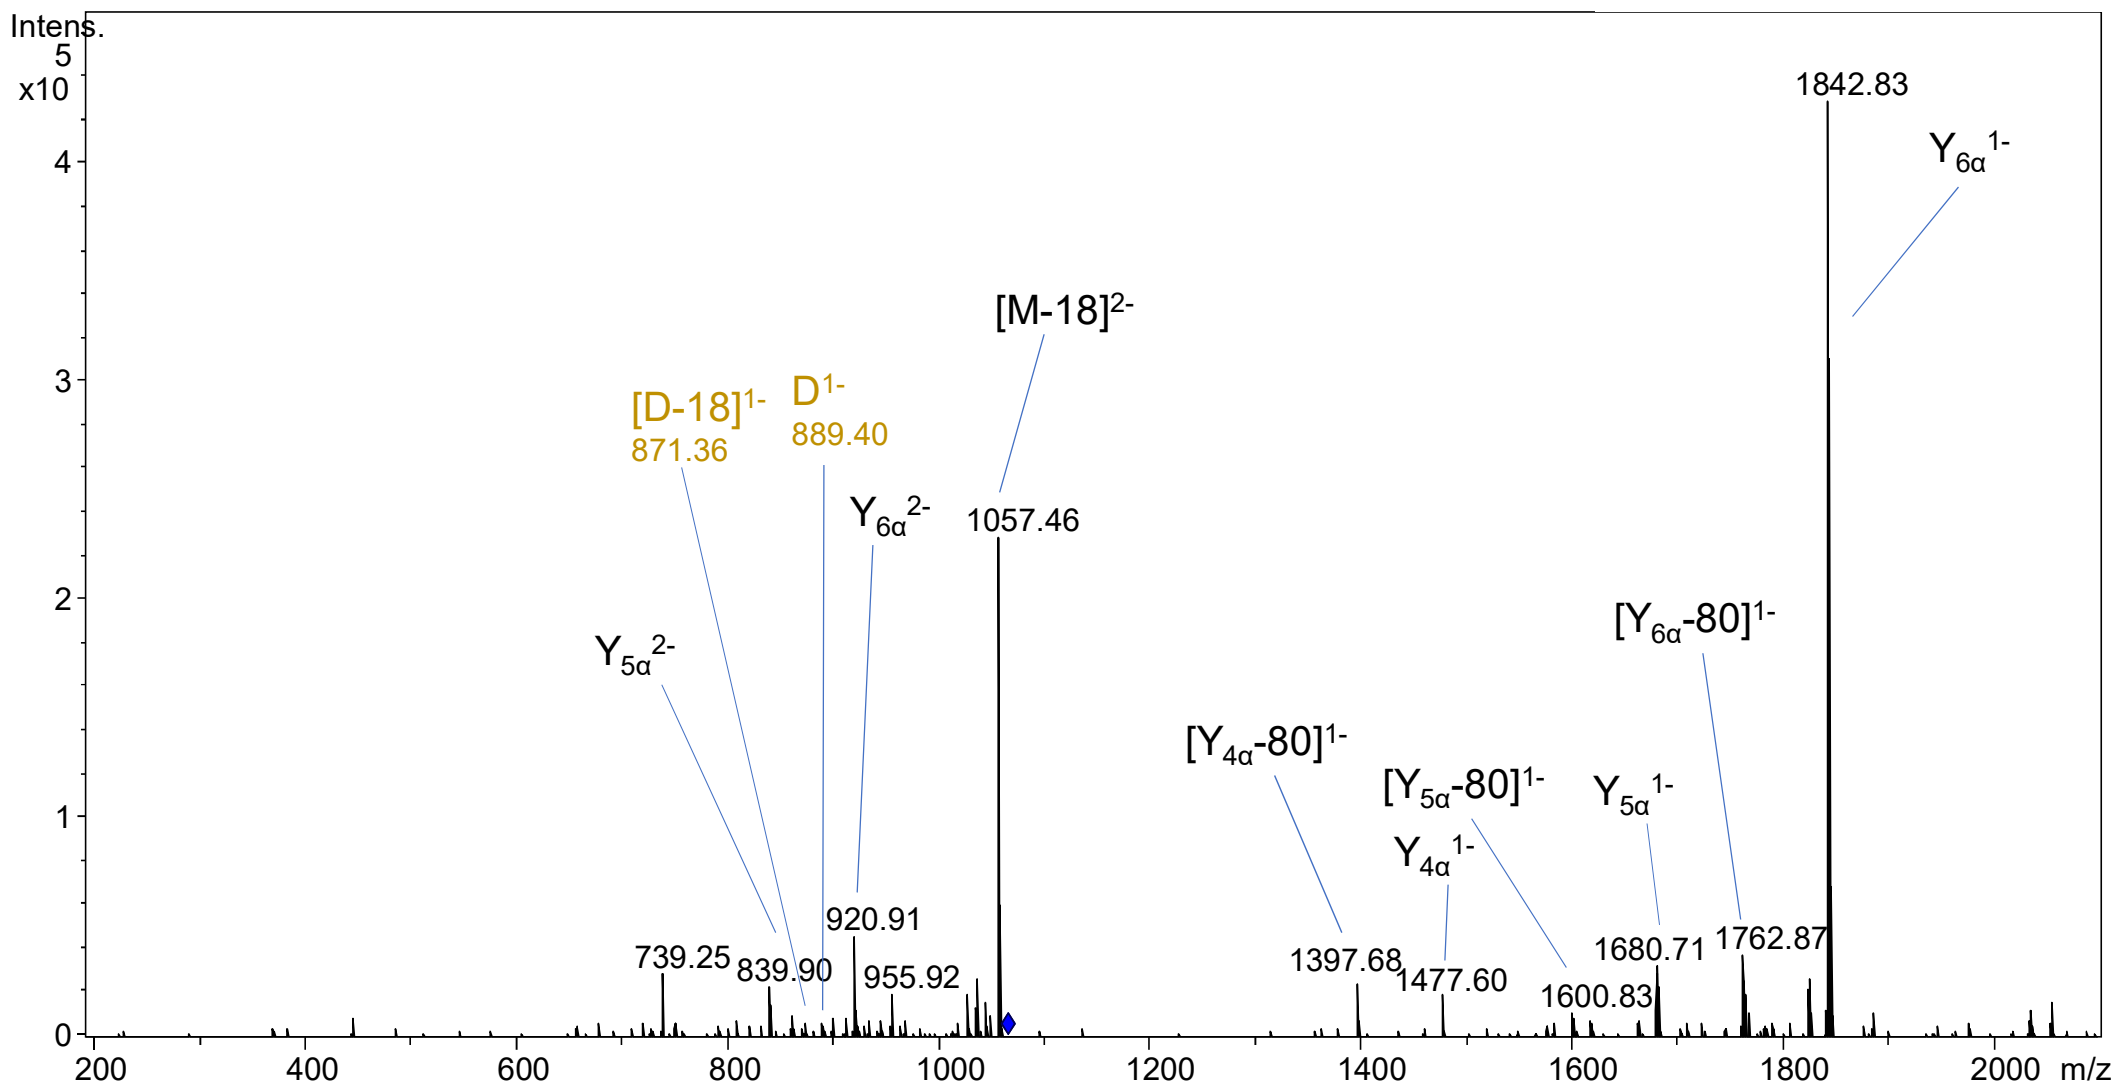

# Glycan 49

A1S1F-M6P  
(H7N3F1S1P1)

Monoisotopic mass: 2280.75 Da  
Charge observed: 2-  
Theoretical ion:  $m/z$  1139.37  
Observed ion:  $m/z$  1139.51  
Mass deviation:  $m/z$  0.13  
Retention time: 56.5 min

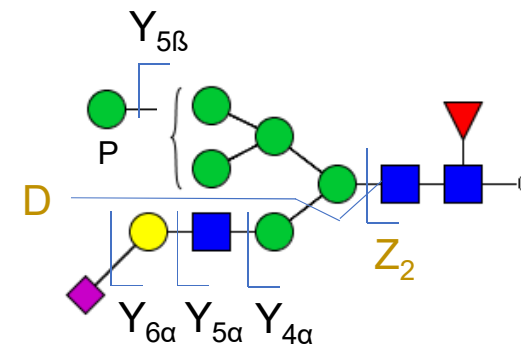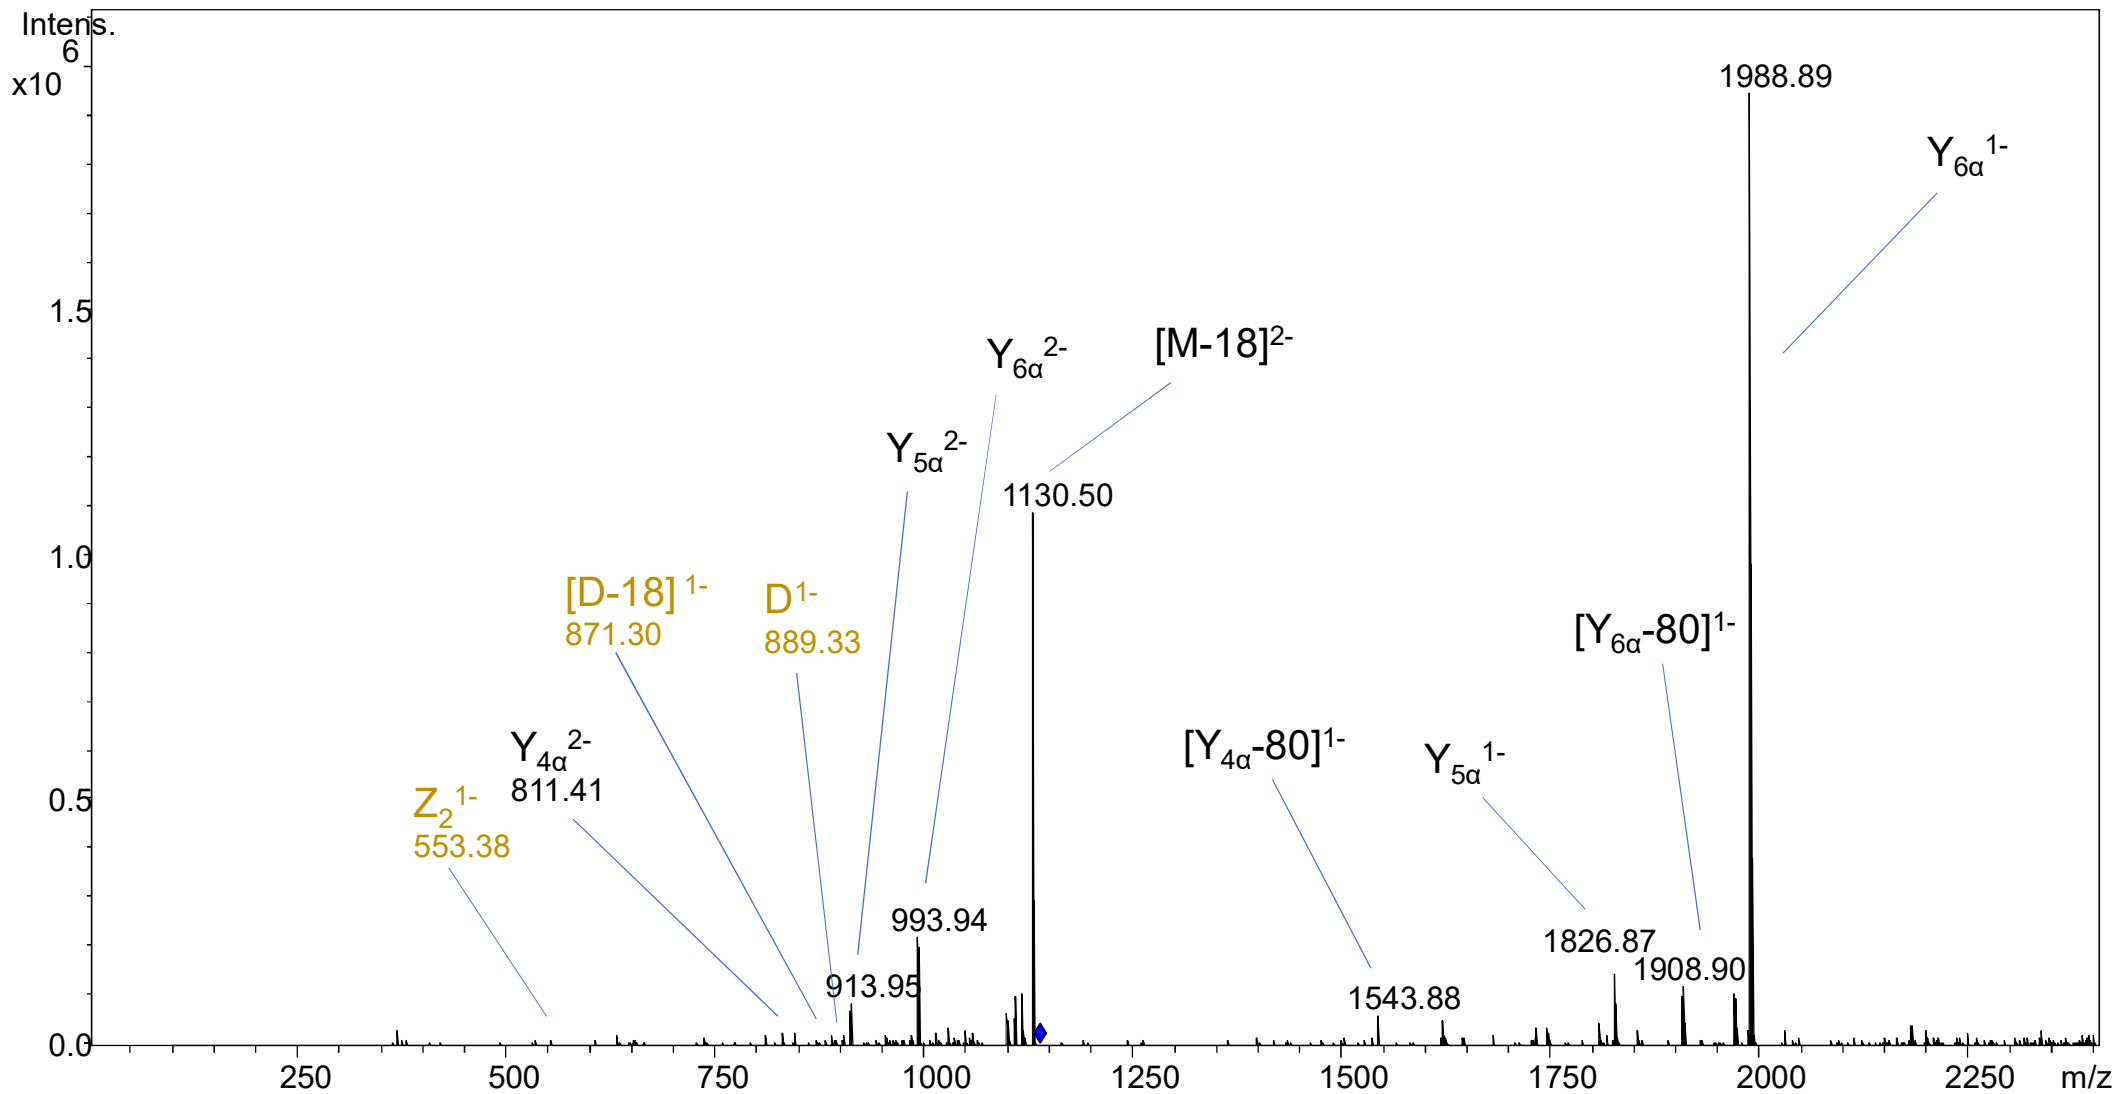



# Glycan 51

A1S1F-M6PGlcNAc  
(H7N4F1S1P1)

Monoisotopic mass: 2483.83 Da  
Charge observed: 2-  
Theoretical ion:  $m/z$  1240.90  
Observed ion:  $m/z$  1241.08  
Mass deviation:  $m/z$  0.18  
Retention time: 58.7 min

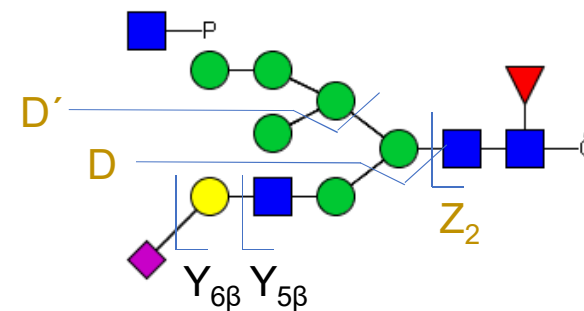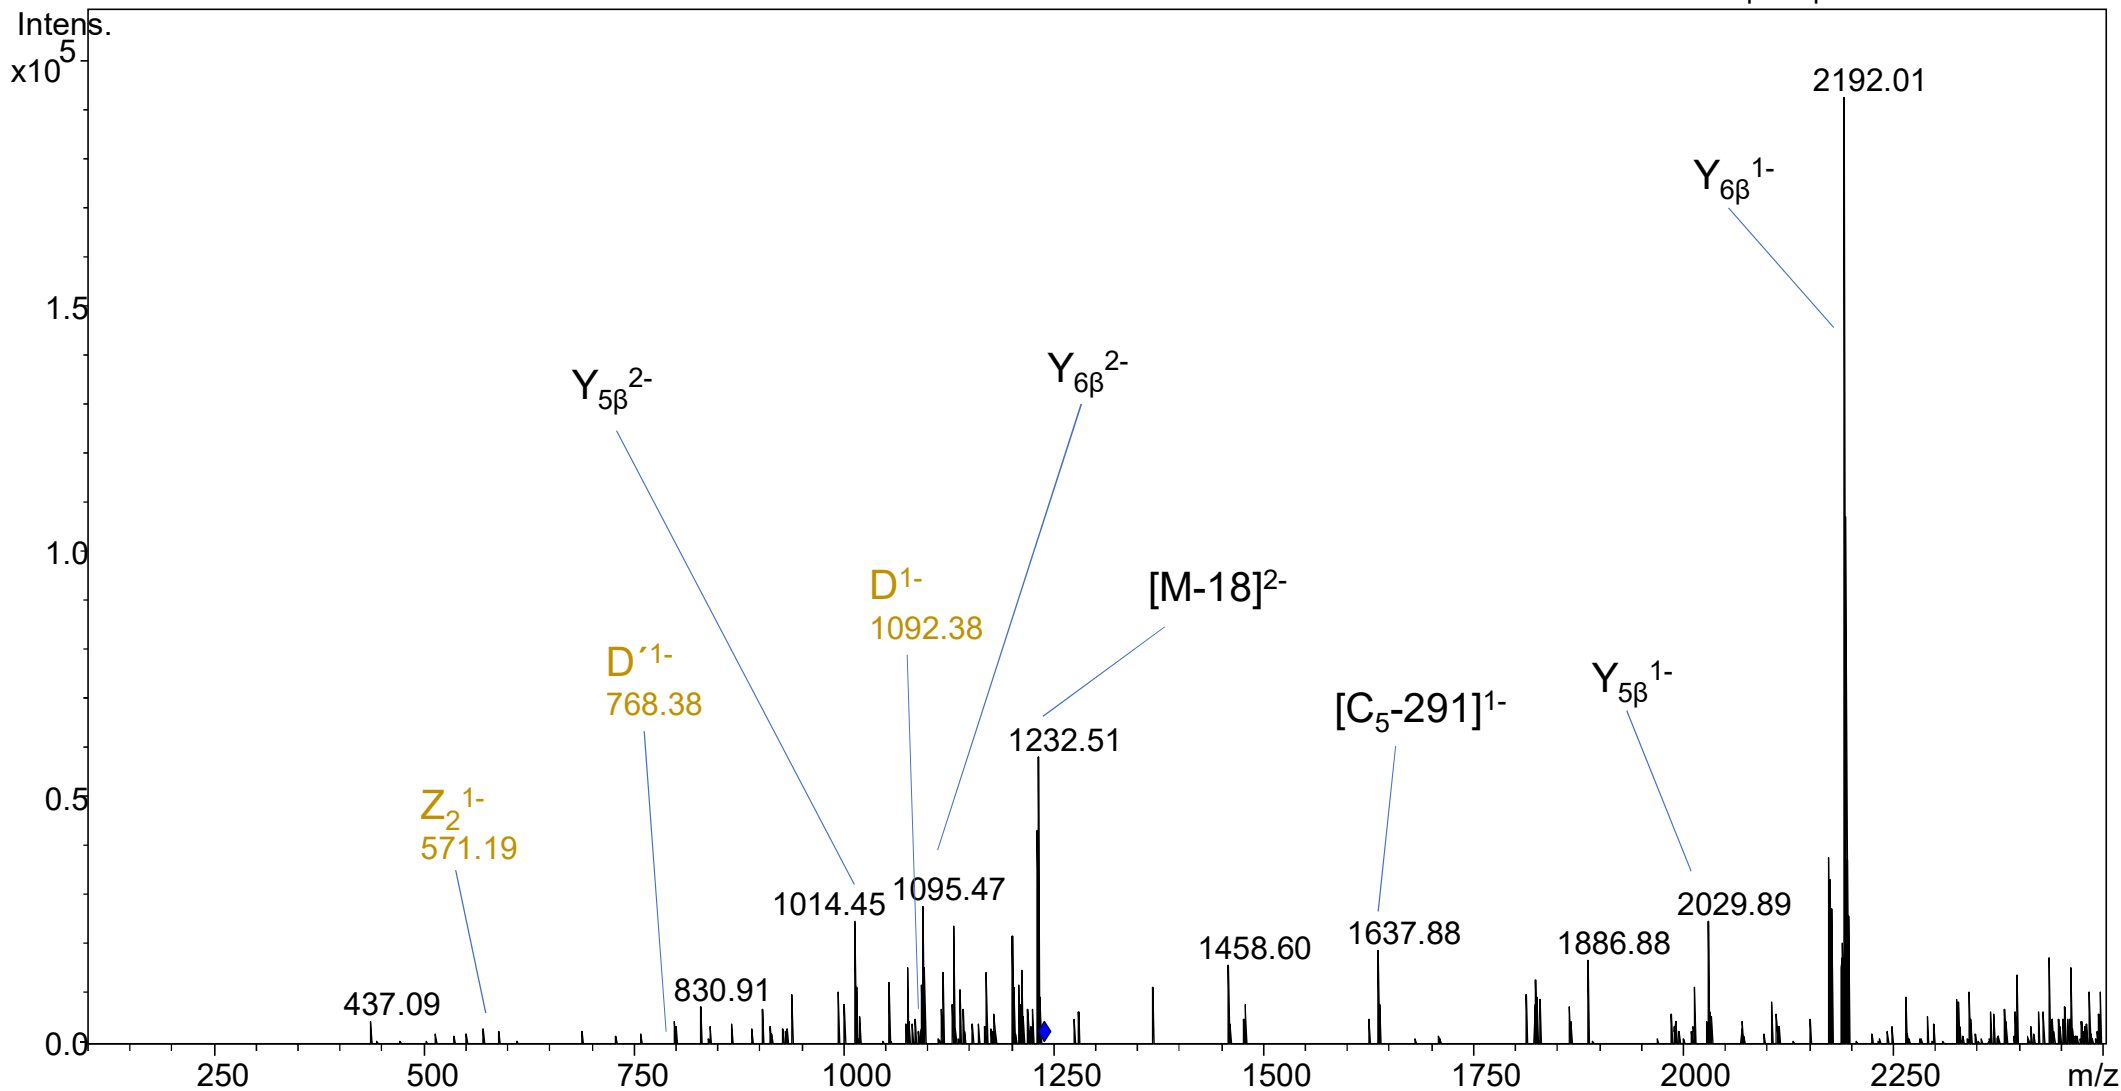

Supplement: mmc2.pdf [file mmc2.pdf]
